# Supplementary material for: Stimuli-triggered modulation of solid-state excimer emission in push–pull cyanovinylene dyes
Source: Royal Society of Chemistry journal article supplement (doi:10.1039/d4tc02736a), 2024-01-01

Supporting Information for

**Stimuli-Triggered Modulation of Solid-State Excimer Emission in Push-Pull Cyanovinylene Dyes**

Dongho Keum,<sup>‡*a*</sup> Siyoung Cho,<sup>‡*b*</sup> Jean Bouffard,<sup>*c*</sup> and Youngmi Kim<sup>*\*,b*</sup>

*<sup>a</sup>Department of Chemistry, Dankook University, 152 Jukjeon-ro, Suji-gu, Yongin-si, Gyeonggi-do, 448-701, Korea*

*<sup>b</sup>Department of Chemistry and Research Institute of Basic Sciences, Kyung Hee University, 26 Kyungheedaero, Dongdaemun-gu, Seoul 02447, Korea*

*<sup>c</sup>Department of Chemistry and Nanoscience, Ewha Womans University, 52 Ewhayeodae-gil, Seodaemun-gu, Seoul, 03760, Korea*

youngmi.kim@khu.ac.kr

Tel: +82 2-961-9537; Fax: +82 2-961-0443

**Table of Contents:**

|            |                                                                            |             |
|------------|----------------------------------------------------------------------------|-------------|
| <b>1.</b>  | Notes on the use of the “excimer” terminology                              | <b>S3</b>   |
| <b>2.</b>  | Synthesis of Compounds                                                     | <b>S4</b>   |
| <b>3.</b>  | Photophysical Property Studies                                             | <b>S7</b>   |
| <b>4.</b>  | Aggregation Behaviors of <b>CV<math>n</math></b> Dyes in Aqueous Solutions | <b>S12</b>  |
| <b>5.</b>  | Time-Resolved Photoluminescence Decay Dynamics                             | <b>S15</b>  |
| <b>6.</b>  | Thermochromic and Mechanochromic Effects                                   | <b>S24</b>  |
| <b>7.</b>  | Differential Scanning Calorimetry (DSC) Measurements                       | <b>S29</b>  |
| <b>8.</b>  | Powder X-ray Diffraction (PXRD) Analysis                                   | <b>S31</b>  |
| <b>9.</b>  | X-ray Crystallographic Data for <b>CV<math>n</math></b> Dyes               | <b>S32</b>  |
| <b>10.</b> | <sup>1</sup> H-NMR and <sup>13</sup> C-NMR Spectral Data                   | <b>S147</b> |

## Experimental

### Materials

All chemicals were purchased commercially and used as received without further purification. All solvents were spectral grade unless otherwise noted. Anhydrous *N,N*-dimethylformamide (DMF) was obtained as a sure-seal bottle from Sigma-Aldrich Co. Inc. (Saint Louis, MO). Flash column chromatography was performed using silica-gel (40  $\mu\text{m}$ ) was obtained from Merck Inc.

### General methods, instrumentation and measurements

Synthetic manipulations that required an inert atmosphere (where noted) were carried out under argon using standard Schlenk techniques. NMR ( $^1\text{H}$  and  $^{13}\text{C}$ ) spectra were recorded on JEOL 400 MHz spectrometer. The  $^1\text{H}$  and  $^{13}\text{C}$  chemical shifts ( $\delta$ ) were reported in parts per million (ppm), referenced to the residual solvent resonances. Splitting patterns are denoted as s (singlet), d (doublet), t (triplet), q (quartet), m (multiplet), and br (broad). Melting point determinations for compounds were performed using open capillaries and are reported without additional corrections. High-resolution electrospray ionization (ESI) mass spectra were obtained at the Korean National Center for Inter-University Research. UV/Vis absorption spectra were obtained on a SCINCO UV S-3100 spectrophotometer. Fluorescence measurements were recorded on a Hitachi F-7000 fluorescence spectrophotometer using quartz cuvettes with a path length of 1 cm. Solution fluorescence quantum yields were determined using rhodamine 6G ( $\Phi_{\text{FL}} = 0.95$  in ethanol) as a standard. Fluorescence quantum yields in the solid state were determined by the integrating sphere method on an absolute PL (photoluminescence) quantum yield measurement system (Hamamatsu C11347-11, Hamamatsu, Japan). Lifetime measurements were conducted at the Korea Basic Science Institute (KBSI), Daegu Center, South Korea.

## 1. Notes on the use of the “excimer” (borrowed and adapted from the Supporting Information document of *Angew. Chem. Int. Ed.* 2015, 54, 3912)

One commonly encountered definition of an excimer is that originally introduced by B. Stevens and E. Hutton (*Nature* 1960, 186, 1045–1046) to distinguish dimers that are stable in the ground state from those that are not. This, as paraphrased by J. B. Birks (*Rep. Prog. Phys.* 1975, 38, 903–945), defined the excimer as: “a dimer which is associated in an electronic excited state and dissociated in its ground electronic state.” The IUPAC Gold Book (<http://goldbook.iupac.org/E02242.html>) offers a similar definition: “An electronically excited dimer, ‘non-bonding’ in the ground state.”

These definitions are valid for intermolecular excimers in fluid media (e.g. solutions), but exclude excimers in rigid media (e.g. aggregates, crystal lattice) and intramolecular excimers. Nevertheless, the excimeric nature of luminescent emission of aromatic molecules like pyrene in the crystal, where intermolecular interactions such as van der Waals forces and  $\pi$ - $\pi$  stacking are significant, has long been recognized as excimeric in nature as well. For instance, Th. Förster wrote in his seminal review in *Angew. Chem.* (1969, 81, 364–374; *Angew. Chem. Int. Ed.* 1969, 8, 333–343):

*“The fluorescence of crystalline pyrene is blue and structureless, and its maximum (4600 Å) hardly differs from that of the long-wave component in solution (4760–4780 Å). This fluorescence is also due to excimers. (...) Excimer fluorescence occurs only in crystals of B type, in whose lattices adjacent molecules have an arrangement similar to that in the excimer. Nevertheless, this arrangement is by no means the same, as is shown by the absorption spectra of type B crystals, which (apart from a slight Davydov splitting) are very similar to the solution spectra. Thus here too the excimer configuration is only achieved after light absorption, with further approach of two molecules that were already adjacent.(...) Excimer formation appears from these observations to concern parallel pairs of adjacent molecules within the crystal rather than the crystal as such.” [emphasis ours]*

The acceptance of the term ‘excimer emission’ for other crystalline dimers is broadly shared, as exemplified by J. B. Birks, in his own seminal review of excimers (*Rep. Prog. Phys.* 1975, 38, 903–945):

*“The pyrene crystal is dimeric in structure, with the molecules arranged in (M || M) sandwich pairs which form the elementary lattice units. The molecules of the unexcited dimer have their planes and axes parallel at an interplanar distance of  $r_0 = 3.53 \text{ Å}$ . (...) because  $r_0$  is less than the range of the attractive excimer interaction, an excimer  $^1D^*$  is rapidly formed by  $^1M^*$  and its unexcited neighbor  $^1M$ , so that the crystal fluorescence spectrum consists entirely of excimer emission.”*

Consequently, Birks and others have promoted a revised definition of an excimer as “a dimer which is associated in an excited electronic state and which is dissociative (i.e. would dissociate in the absence of restraints) in its ground electronic state.” to include crystal dimers, intramolecular excimers and sandwich dimers in rigid solutions, all of which were excluded by the original definition [emphasis in the original text, *Rep. Prog. Phys.* 1975, 38, 903–945]. As discussed, additional terminology has been developed to distinguish situations in which interactions are present in the ground state (but where dissociation would occur in the absence of restraints, such as those found in condensed non-fluid phases, and thus remain ‘dissociative’) and those where no interactions are present. For instance, F. Winnik in her review of pyrene excimers in organized media (*Chem. Rev.* 1993, 93, 587-614) discusses dynamic vs. static excimers, and introduces the distinction of (pre)associated excimers.

On the basis of these definitions, the conclusion that the emission of CV dyes, composed of an electron acceptor (benzothiazole), a  $\pi$ -conjugated bridge (cyanovinyl), an electron donor (*N,N*-dialkylaniline), is excimer emission remains valid. The experimental evidence is consistent with the assertion that the photophysical properties of the dyes are entirely analogous to that of pyrene, the reference excimer-forming aromatic molecule:

- In both the case of pyrene and that of the CV dyes, the crystals are dimeric in structure, forming face-to-face sandwich pairs (type B crystals) by a combination of van der Waals forces and  $\pi$ - $\pi$  stacking interactions. These interactions are sufficient to slightly affect the absorption spectra and result in a splitting of the absorption bands, but not strong enough to maintain the stability of the dimer in solution. In other words, while interactions exist in the ground state, they do not amount to bonding, which is consistent with the IUPAC Gold Book definition of an excimer.
- In both the case of pyrene and that of the CV dyes, these ground state interactions are nevertheless not significant enough to be responsible for the new emission, and are not the same as that of the excimer. By maintaining a short distance and a proper respective orientation of the molecules, they merely facilitate the formation of a dissociative emissive excimer upon irradiation. Comparable ground state interactions are also present in the aggregates of the CV dyes, as evidenced by the small change in their absorption and excitation spectra.

## 2. Synthesis of Compounds

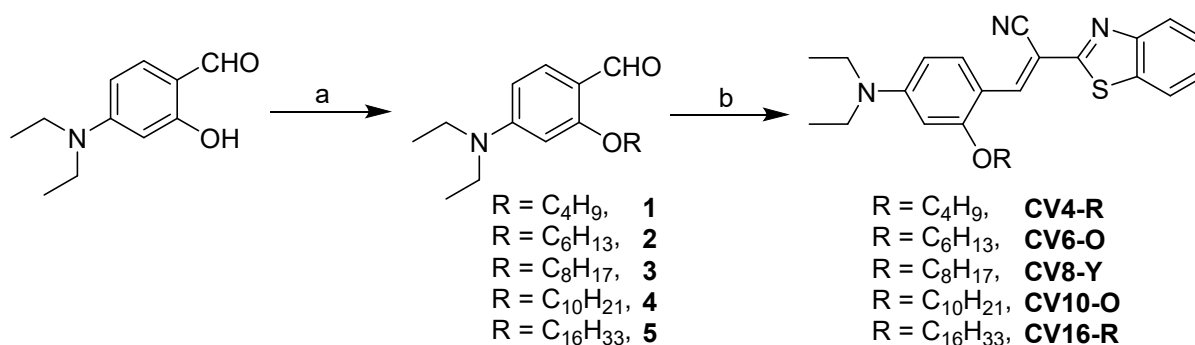

**Scheme S1.** Synthetic scheme for compounds, reagents, and conditions. (a) RBr,  $K_2CO_3$ , DMF, 80 °C, 12 h; (b) 2-benzothiazole- acetonitrile, piperidine, ethanol, room temperature, 12 h.

### (a) Synthesis of compounds 1-5

**2-Butoxy-4-(diethylamino)benzaldehyde (1).** To a stirred mixture of 4-(diethylamino)salicylaldehyde (300 mg, 1.55 mmol) and  $K_2CO_3$  (540 mg, 3.88 mmol) in dry DMF (5 mL) under an argon atmosphere was added 1-bromobutane (210  $\mu$ L, 1.86 mmol) at room temperature. After the resulting mixture was stirred at 80 °C for 12 hours, the reaction solution was evaporated under reduced pressure, diluted with  $CH_2Cl_2$ , and washed with water ( $3 \times 100$  mL). The combined organic layer was dried over  $MgSO_4$ , filtered, and the solvent was evaporated under reduced pressure. The crude product was purified by column chromatography on silica gel using progressively more polar 100:1 to 80:1 hexanes:ethyl acetate as the mobile phase to afford **1** as a brown liquid (390 mg, 99%).  $^1H$ -NMR (400 MHz,  $CDCl_3$ ):  $\delta = 10.18$  (s, 1H), 7.71 (d,  $J = 9.2$  Hz, 1H), 6.26 (d,  $J = 8.8$  Hz, 1H), 6.01 (s, 1H), 4.03 (t,  $J = 6.4$  Hz, 2H), 3.41 (q,  $J = 6.8$  Hz, 4H), 1.81 (m, 2H), 1.52 (m, 2H), 1.21 (m, 6H), 0.98 (t,  $J = 7.2$  Hz, 3H).  $^{13}C$ -NMR (100 MHz,  $CDCl_3$ ):  $\delta = 187.3, 164.0, 153.9, 130.2, 114.3, 104.3, 93.1, 67.8, 44.9, 31.3, 19.4, 14.0, 12.7$ . HR-MS (ESI): calcd. for  $C_{15}H_{23}NO_2$   $[M]^+$  249.1729, found 249.1730.

**4-(Diethylamino)-2-(hexyloxy)benzaldehyde (2).** To a stirred mixture of 4-(diethylamino)salicylaldehyde (400 mg, 2.07 mmol) and  $K_2CO_3$  (720 mg, 5.18 mmol) in dry DMF (5 mL) under an argon atmosphere was added 1-bromohexane (270  $\mu$ L, 2.48 mmol) at room temperature. After the resulting mixture was stirred at 80 °C for 12 hours, the reaction solution was evaporated under reduced pressure, diluted with  $CH_2Cl_2$ , and washed with water ( $3 \times 100$  mL). The combined organic layer was dried over  $MgSO_4$ , filtered, and the solvent was evaporated under reduced pressure. The crude product was purified by column chromatography on silica gel using progressively more polar 100:1 to 80:1 hexanes:ethyl acetate as the mobile phase to afford **2** as a brown liquid (545 mg, 95%).  $^1H$ -NMR (400 MHz,  $CDCl_3$ ):  $\delta = 10.18$  (s, 1H), 7.71 (d,  $J = 9.2$  Hz, 1H), 6.27 (d,  $J = 9.2$  Hz, 1H), 6.02 (s, 1H), 4.02 (t,  $J = 6.4$  Hz, 2H), 3.42 (q,  $J = 7.2$  Hz, 4H), 1.83 (m, 2H), 1.49 (m, 2H), 1.35 (m, 4H), 1.21 (m, 6H), 0.91 (t,  $J = 6.8$  Hz, 3H).  $^{13}C$ -NMR (100 MHz,  $CDCl_3$ ):  $\delta = 187.3, 164.0, 153.9, 130.2, 114.5, 104.3, 93.3, 68.2, 44.8, 31.6, 29.2, 25.9, 22.7, 14.1, 12.7$ . HR-MS (ESI): calcd. for  $C_{17}H_{27}NO_2$   $[M]^+$  277.2042, found 277.2042.

**4-(Diethylamino)-2-(octyloxy)benzaldehyde (3).** To a stirred mixture of 4-(diethylamino)salicylaldehyde (400 mg, 2.07 mmol) and  $K_2CO_3$  (720 mg, 5.18 mmol) in dry DMF (5 mL) under an argon atmosphere was added 1-bromooctane (430  $\mu$ L, 2.48 mmol) at room temperature. After the resulting mixture was stirred at 80 °C for 12 hours, the reaction solution was evaporated under reduced pressure, diluted with  $CH_2Cl_2$ , and washed with water ( $3 \times 100$  mL). The combined organic layer was dried over  $MgSO_4$ , filtered, and the solvent was evaporated under reduced pressure. The crude product was purified by column chromatography on silica gel using progressively more polar 100:1 to 80:1 hexanes:ethyl acetate as the mobile phase to afford **3** as a brown liquid (650 mg, 99%).  $^1H$ -NMR (400 MHz,  $CDCl_3$ ):  $\delta = 10.18$  (s, 1H), 7.71 (d,  $J = 9.2$  Hz, 1H), 6.27 (d,  $J =$

8.8 Hz, 1H), 6.02 (s, 1H), 4.02 (t,  $J = 6.4$  Hz, 2H), 3.42 (q,  $J = 7.2$  Hz, 4H), 1.83 (m, 2H), 1.49 (m, 2H), 1.26 (m, 14H), 0.89 (t,  $J = 7.2$  Hz, 3H).  $^{13}\text{C-NMR}$  (100 MHz,  $\text{CDCl}_3$ ):  $\delta = 187.3, 164.0, 153.9, 130.2, 114.5, 104.3, 93.3, 68.2, 44.8, 31.9, 29.4, 29.3, 29.3, 26.2, 22.7, 14.2, 12.7$ . HR-MS (ESI): calcd. for  $\text{C}_{19}\text{H}_{31}\text{NO}_2$   $[\text{M}]^+$  305.2355, found 305.2357.

**2-(Decyloxy)-4-(diethylamino)benzaldehyde (4).** To a stirred mixture of 4-(diethylamino)salicylaldehyde (200 mg, 1.03 mmol) and  $\text{K}_2\text{CO}_3$  (360 mg, 2.58 mmol) in dry DMF (5 mL) under an argon atmosphere was added 1-bromodecane (270  $\mu\text{L}$ , 1.24 mmol) at room temperature. After the resulting mixture was stirred at 80  $^\circ\text{C}$  for 12 hours, the reaction solution was evaporated under reduced pressure, diluted with  $\text{CH}_2\text{Cl}_2$ , and washed with water ( $3 \times 100$  mL). The combined organic layer was dried over  $\text{MgSO}_4$ , filtered, and the solvent was evaporated under reduced pressure. The crude product was purified by column chromatography on silica gel using progressively more polar 100:1 to 80:1 hexanes:ethyl acetate as the mobile phase to afford **4** as a brown liquid (310 mg, 89%).  $^1\text{H-NMR}$  (400 MHz,  $\text{CDCl}_3$ ):  $\delta = 10.18$  (s, 1H), 7.71 (d,  $J = 8.8$  Hz, 1H), 6.27 (d,  $J = 8.4$  Hz, 1H), 6.02 (s, 1H), 4.02 (t,  $J = 6.4$  Hz, 2H), 3.42 (q,  $J = 7.2$  Hz, 4H), 1.83 (m, 2H), 1.48 (m, 2H), 1.29 (m, 18H), 0.88 (t,  $J = 6.4$  Hz, 3H).  $^{13}\text{C-NMR}$  (100 MHz,  $\text{CDCl}_3$ ):  $\delta = 187.3, 164.0, 153.9, 130.2, 114.5, 104.3, 93.3, 68.2, 44.8, 32.0, 29.7, 29.5, 29.4, 29.3, 26.2, 22.8, 14.2, 12.7$ . HR-MS (ESI): calcd. for  $\text{C}_{21}\text{H}_{35}\text{NO}_2$   $[\text{M}]^+$  333.2668, found 333.2669.

**4-(Diethylamino)-2-(hexadecyloxy)benzaldehyde (5).** To a stirred mixture of 4-(diethylamino)salicylaldehyde (200 mg, 1.03 mmol) and  $\text{K}_2\text{CO}_3$  (360 mg, 2.58 mmol) in dry DMF (5 mL) under an argon atmosphere was added 1-bromohexadecane (380  $\mu\text{L}$ , 1.24 mmol) at room temperature. After the resulting mixture was stirred at 80  $^\circ\text{C}$  for 12 hours, the reaction solution was evaporated under reduced pressure, diluted with  $\text{CH}_2\text{Cl}_2$ , and washed with water ( $3 \times 100$  mL). The combined organic layer was dried over  $\text{MgSO}_4$ , filtered and the solvent was evaporated under reduced pressure. The crude product was purified by column chromatography on silica gel using progressively more polar 100:1 to 80:1 hexanes:ethyl acetate as the mobile phase to afford **5** as a white solid (390 mg, 90%).  $^1\text{H-NMR}$  (400 MHz,  $\text{CDCl}_3$ ):  $\delta = 10.18$  (s, 1H), 7.71 (d,  $J = 8.8$  Hz, 1H), 6.27 (d,  $J = 8.4$  Hz, 1H), 6.02 (s, 1H), 4.02 (t,  $J = 6.4$  Hz, 2H), 3.42 (q,  $J = 7.2$  Hz, 4H), 1.83 (m, 2H), 1.48 (m, 2H), 1.26 (m, 30H), 0.88 (t,  $J = 7.2$  Hz, 3H).  $^{13}\text{C-NMR}$  (100 MHz,  $\text{CDCl}_3$ ):  $\delta = 187.3, 164.0, 153.9, 130.2, 114.5, 104.3, 93.3, 68.2, 44.8, 32.0, 29.8, 29.7, 29.5, 29.4, 29.3, 26.2, 22.8, 14.2, 12.7$ . HR-MS (ESI): calcd. for  $\text{C}_{27}\text{H}_{48}\text{NO}_2$   $[\text{M}+\text{H}]^+$  418.3680, found 418.3685.

## (b) Synthesis of CVn-X dyes

**(E)-2-(Benzo[d]thiazol-2-yl)-3-(2-butoxy-4-(diethylamino)phenyl)acrylonitrile (CV4-R).** To a stirred solution of 2-butoxy-4-(diethylamino)benzaldehyde **1** (380 mg, 1.52 mmol) and 2-benzothiazoleacetonitrile (265 mg, 1.52 mmol) in ethanol (10 mL) at room temperature was added piperidine (190  $\mu\text{L}$ , 1.82 mmol). The resulting solution was stirred at room temperature for 12 hours. The precipitate formed was collected by filtration, washed with ethanol, and dried under vacuum to afford **CV4-R** as an orange solid (453 mg, 73%). m.p. 122-123  $^\circ\text{C}$ .  $^1\text{H-NMR}$  (400 MHz,  $\text{CDCl}_3$ ):  $\delta = 8.53$  (s, 1H), 8.44 (d,  $J = 9.2$  Hz, 1H), 8.01 (d,  $J = 8.4$  Hz, 1H), 7.83 (d,  $J = 8.8$  Hz, 1H), 7.45 (t,  $J = 6.4$  Hz, 1H), 7.33 (t,  $J = 8.4$  Hz, 1H), 6.36 (d,  $J = 9.2$  Hz, 1H), 6.07 (s, 1H), 4.05 (t,  $J = 6.4$  Hz, 2H), 3.44 (q,  $J = 7.2$  Hz, 4H), 1.90 (m, 2H), 1.61 (m, 2H), 1.24 (t,  $J = 7.2$  Hz, 6H), 1.05 (t,  $J = 7.2$  Hz, 3H).  $^{13}\text{C-NMR}$  (100 MHz,  $\text{CDCl}_3$ ):  $\delta = 166.2, 161.1, 154.1, 152.7, 141.5, 134.4, 130.5, 126.4, 124.9, 123.0, 121.3, 118.7, 110.0, 105.1, 96.3, 93.8, 68.2, 44.9, 31.3, 19.5, 14.0, 12.8$ . HR-MS (ESI): calcd. for  $\text{C}_{24}\text{H}_{27}\text{N}_3\text{OS}$   $[\text{M}]^+$  405.1875, found 405.1875.

**(E)-2-(Benzo[d]thiazol-2-yl)-3-(4-(diethylamino)-2-(hexyloxy)phenyl)acrylonitrile (CV6-O).** To a stirred solution of 4-(diethylamino)-2-(hexyloxy)benzaldehyde **2** (545 mg, 1.96 mmol) and 2-benzothiazoleacetonitrile (340 mg, 1.96 mmol) in ethanol (15 mL) at room temperature was added piperidine (240  $\mu\text{L}$ , 2.35 mmol). The resulting solution was stirred at room temperature for 12 hours. The precipitate formed was collected by filtration, washed with ethanol, and dried under vacuum to afford **CV6-O** as an orange solid (680 mg, 80%). m.p. 120-122  $^\circ\text{C}$ .  $^1\text{H-NMR}$  (400 MHz,  $\text{CDCl}_3$ ):  $\delta = 8.53$  (s, 1H), 8.44 (d,  $J = 9.2$

Hz, 1H), 8.01 (d,  $J = 7.6$  Hz, 1H), 7.82 (d,  $J = 8.4$  Hz, 1H), 7.45 (t,  $J = 8.4$  Hz, 1H), 7.33 (t,  $J = 6.8$  Hz, 1H), 6.36 (d,  $J = 9.6$  Hz, 1H), 6.06 (s, 1H), 4.04 (t,  $J = 6.4$  Hz, 2H), 3.44 (q,  $J = 7.2$  Hz, 4H), 1.90 (m, 2H), 1.57 (m, 2H), 1.39 (m, 4H), 1.23 (t,  $J = 7.2$  Hz, 6H), 0.94 (t,  $J = 6.8$  Hz, 3H).  $^{13}\text{C-NMR}$  (100 MHz,  $\text{CDCl}_3$ ):  $\delta = 166.2, 161.1, 154.1, 152.7, 141.5, 134.4, 130.5, 126.4, 124.9, 123.0, 121.3, 118.7, 110.0, 105.1, 96.3, 93.8, 68.5, 44.9, 31.7, 29.2, 26.0, 22.7, 14.2, 12.8$ . HR-MS (ESI): calcd. for  $\text{C}_{26}\text{H}_{31}\text{N}_3\text{OS}$   $[\text{M}]^+$  433.2188, found 433.2189.

**(E)-2-(Benzo[d]thiazol-2-yl)-3-(4-(diethylamino)-2-(octyloxy)phenyl)acrylonitrile (CV8-Y).** To a stirred solution of 4-(diethylamino)-2-(octyloxy)benzaldehyde **3** (650 mg, 2.13 mmol) and 2-benzothiazoleacetonitrile (370 mg, 2.13 mmol) in ethanol (15 mL) at room temperature was added piperidine (260  $\mu\text{L}$ , 2.56 mmol). The resulting solution was stirred at room temperature for 12 hours. The precipitate formed was collected by filtration, washed with ethanol, and dried under vacuum to afford **CV8-Y** as an orange solid (865 mg, 88%). m.p. 96-98  $^\circ\text{C}$ .  $^1\text{H-NMR}$  (400 MHz,  $\text{CDCl}_3$ ):  $\delta = 8.52$  (s, 1H), 8.44 (d,  $J = 9.2$  Hz, 1H), 8.01 (d,  $J = 8.0$  Hz, 1H), 7.82 (d,  $J = 8.4$  Hz, 1H), 7.45 (t,  $J = 7.2$  Hz, 1H), 7.33 (t,  $J = 6.8$  Hz, 1H), 6.35 (d,  $J = 9.2$  Hz, 1H), 6.06 (s, 1H), 4.04 (t,  $J = 6.4$  Hz, 2H), 3.44 (q,  $J = 6.8$  Hz, 4H), 1.90 (m, 2H), 1.56 (m, 2H), 1.45-1.21 (m, 14H), 0.87 (t,  $J = 7.2$  Hz, 3H).  $^{13}\text{C-NMR}$  (100 MHz,  $\text{CDCl}_3$ ):  $\delta = 166.2, 161.1, 154.1, 152.7, 141.5, 134.4, 130.5, 126.4, 124.9, 123.0, 121.3, 118.7, 110.0, 105.1, 96.2, 93.7, 68.5, 44.9, 31.9, 29.5, 29.4, 26.3, 22.8, 14.2, 12.8$ . HR-MS (ESI): calcd. for  $\text{C}_{28}\text{H}_{35}\text{N}_3\text{OS}$   $[\text{M}]^+$  461.2501, found 461.2500.

**(E)-2-(Benzo[d]thiazol-2-yl)-3-(2-(decyloxy)-4-(diethylamino)phenyl)acrylonitrile (CV10-O).** To a stirred solution of 2-(decyloxy)-4-(diethylamino)benzaldehyde **4** (310 mg, 0.93 mmol) and 2-benzothiazoleacetonitrile (162 mg, 0.93 mmol) in ethanol (10 mL) at room temperature was added piperidine (120  $\mu\text{L}$ , 1.12 mmol). The resulting solution was stirred at room temperature for 12 hours. The precipitate was collected by filtration, washed with ethanol, and dried under vacuum to afford **CV10-O** as an orange solid (300 mg, 79%). m.p. 110-112  $^\circ\text{C}$ .  $^1\text{H-NMR}$  (400 MHz,  $\text{CDCl}_3$ ):  $\delta = 8.53$  (s, 1H), 8.44 (d,  $J = 9.2$  Hz, 1H), 8.01 (d,  $J = 8.4$  Hz, 1H), 7.82 (d,  $J = 8.4$  Hz, 1H), 7.45 (t,  $J = 8.4$  Hz, 1H), 7.33 (t,  $J = 8.0$  Hz, 1H), 6.36 (d,  $J = 9.2$  Hz, 1H), 6.07 (s, 1H), 4.04 (t,  $J = 6.4$  Hz, 2H), 3.44 (q,  $J = 7.2$  Hz, 4H), 1.90 (m, 2H), 1.57 (m, 2H), 1.42-1.22 (m, 18H), 0.86 (t,  $J = 6.2$  Hz, 3H).  $^{13}\text{C-NMR}$  (100 MHz,  $\text{CDCl}_3$ ):  $\delta = 166.1, 161.1, 154.1, 152.7, 141.5, 134.4, 130.5, 126.3, 124.9, 123.0, 121.3, 118.7, 110.1, 105.1, 96.3, 93.8, 68.5, 44.9, 32.0, 29.8, 29.7, 29.5, 29.5, 26.3, 22.8, 14.2, 12.8$ . HR-MS (ESI): calcd. for  $\text{C}_{30}\text{H}_{39}\text{N}_3\text{OS}$   $[\text{M}]^+$  489.2814, found 489.2815.

**(E)-2-(Benzo[d]thiazol-2-yl)-3-(4-(diethylamino)-2-(hexadecyloxy)phenyl)acrylonitrile (CV16-R).** To a stirred solution of 4-(diethylamino)-2-(hexadecyloxy)benzaldehyde **5** (200 mg, 0.48 mmol) and 2-benzothiazoleacetonitrile (85 mg, 0.48 mmol) in ethanol (5 mL) at room temperature was added piperidine (60  $\mu\text{L}$ , 0.57 mmol). The resulting solution was stirred at room temperature for 12 hours. The precipitate was collected by filtration, washed with ethanol, and dried under vacuum to afford **CV16-R** as an orange solid (230 mg, 83%). m.p. 92  $^\circ\text{C}$ .  $^1\text{H-NMR}$  (400 MHz,  $\text{CDCl}_3$ ):  $\delta = 8.54$  (s, 1H), 8.44 (d,  $J = 9.2$  Hz, 1H), 8.01 (d,  $J = 8.4$  Hz, 1H), 7.82 (d,  $J = 8.8$  Hz, 1H), 7.44 (t,  $J = 7.2$  Hz, 1H), 7.33 (t,  $J = 8.0$  Hz, 1H), 6.37 (d,  $J = 9.2$  Hz, 1H), 6.07 (s, 1H), 4.04 (t,  $J = 6.4$  Hz, 2H), 3.45 (q,  $J = 6.8$  Hz, 4H), 1.90 (m, 2H), 1.56 (m, 2H), 1.42-1.22 (m, 30H), 0.88 (t,  $J = 6.6$  Hz, 3H).  $^{13}\text{C-NMR}$  (100 MHz,  $\text{CDCl}_3$ ):  $\delta = 166.2, 161.2, 154.2, 152.8, 141.6, 134.5, 130.6, 126.4, 125.0, 123.1, 121.3, 118.7, 110.2, 105.2, 96.4, 93.9, 68.6, 45.0, 32.1, 29.9, 29.8, 29.6, 29.5, 29.3, 26.4, 22.8, 14.3, 12.9$ . HR-MS (ESI): calcd. for  $\text{C}_{36}\text{H}_{52}\text{N}_3\text{OS}$   $[\text{M}+\text{H}]^+$  574.3821, found 574.3831.

### 3. Photophysical Property Studies

**Table S1.** Photophysical properties of compounds at 25 °C.

| Compounds     | Solution                        |                                    |                                                   |                                     |                      | Powdered Solid   |                                     |                      |                  |
|---------------|---------------------------------|------------------------------------|---------------------------------------------------|-------------------------------------|----------------------|------------------|-------------------------------------|----------------------|------------------|
|               | Solvents                        | $\lambda_{\text{abs,max}}$<br>(nm) | $\epsilon^a$<br>( $\text{M}^{-1}\text{cm}^{-1}$ ) | $\lambda_{\text{em,max}}^b$<br>(nm) | $\Phi_{\text{FL}}^c$ | $\tau^e$<br>(ns) | $\lambda_{\text{em,max}}^b$<br>(nm) | $\Phi_{\text{FL}}^d$ | $\tau^e$<br>(ns) |
| <b>CV4-R</b>  | CH <sub>2</sub> Cl <sub>2</sub> | 464                                | 74100                                             | 526                                 | 0.004                | N.D.             |                                     |                      |                  |
|               | THF                             | 461                                | 74700                                             | 524                                 | 0.005                | N.D.             | 632                                 | 0.16                 | 6.59             |
|               | CH <sub>3</sub> CN              | 467                                | 68100                                             | 531                                 | 0.001                | 0.064            |                                     |                      |                  |
| <b>CV6-O</b>  | CH <sub>2</sub> Cl <sub>2</sub> | 465                                | 79000                                             | 526                                 | 0.003                | N.D.             |                                     |                      |                  |
|               | THF                             | 460                                | 67300                                             | 521                                 | 0.002                | N.D.             | 594                                 | 0.18                 | 4.60             |
|               | CH <sub>3</sub> CN              | 470                                | 71100                                             | 530                                 | 0.001                | 0.065            |                                     |                      |                  |
| <b>CV8-Y</b>  | CH <sub>2</sub> Cl <sub>2</sub> | 464                                | 64900                                             | 527                                 | 0.003                | N.D.             |                                     |                      |                  |
|               | THF                             | 460                                | 69400                                             | 520                                 | 0.001                | N.D.             | 576                                 | 0.40                 | 1.59             |
|               | CH <sub>3</sub> CN              | 465                                | 66800                                             | 532                                 | 0.001                | 0.063            |                                     |                      |                  |
| <b>CV10-O</b> | CH <sub>2</sub> Cl <sub>2</sub> | 463                                | 83400                                             | 526                                 | 0.003                | N.D.             |                                     |                      |                  |
|               | THF                             | 460                                | 65200                                             | 522                                 | 0.004                | N.D.             | 589                                 | 0.20                 | 2.00             |
|               | CH <sub>3</sub> CN              | 465                                | 68000                                             | 532                                 | 0.001                | 0.064            |                                     |                      |                  |
| <b>CV16-R</b> | CH <sub>2</sub> Cl <sub>2</sub> | 463                                | 62200                                             | 525                                 | 0.002                | N.D.             |                                     |                      |                  |
|               | THF                             | 461                                | 70600                                             | 525                                 | 0.001                | N.D.             | 671                                 | 0.07                 | 5.45             |
|               | CH <sub>3</sub> CN              | 466                                | 59400                                             | 528                                 | 0.001                | 0.067            |                                     |                      |                  |

<sup>a</sup>Measured at each absorption maximum. <sup>b</sup>Excited at 440 nm <sup>c</sup>Quantum yields vs. rhodamine 6G in ethanol ( $\Phi_{\text{FL}} = 0.95$ ). <sup>d</sup>Absolute fluorescence quantum yield in the solid state evaluated using an integrating sphere. <sup>e</sup>The average weighted lifetimes.  $\tau_{\text{avg}} = \text{average fluorescence lifetime calculated by } \langle \tau \rangle_{\text{amp}} = \{\sum (f_i * \tau_i)\} / \{\sum (f_i)\}$ . N.D.= not determined.

(a) Absorption and emission spectra of CV $n$  dyes in organic solvents

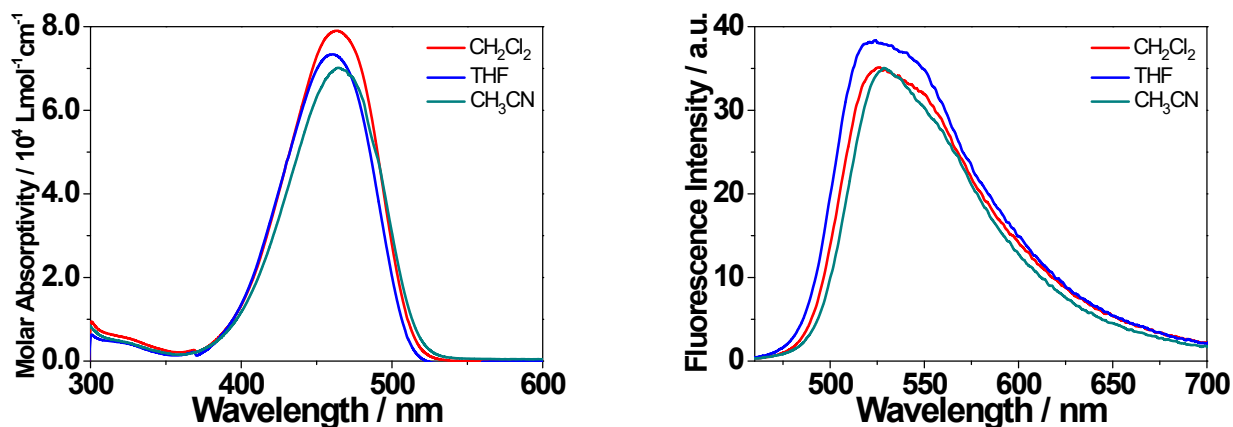

**Figure S1.** Absorption (left) and emission (right) spectra of CV4-R (20  $\mu$ M) in various organic solvents at 25  $^{\circ}$ C. Excited at 440 nm.

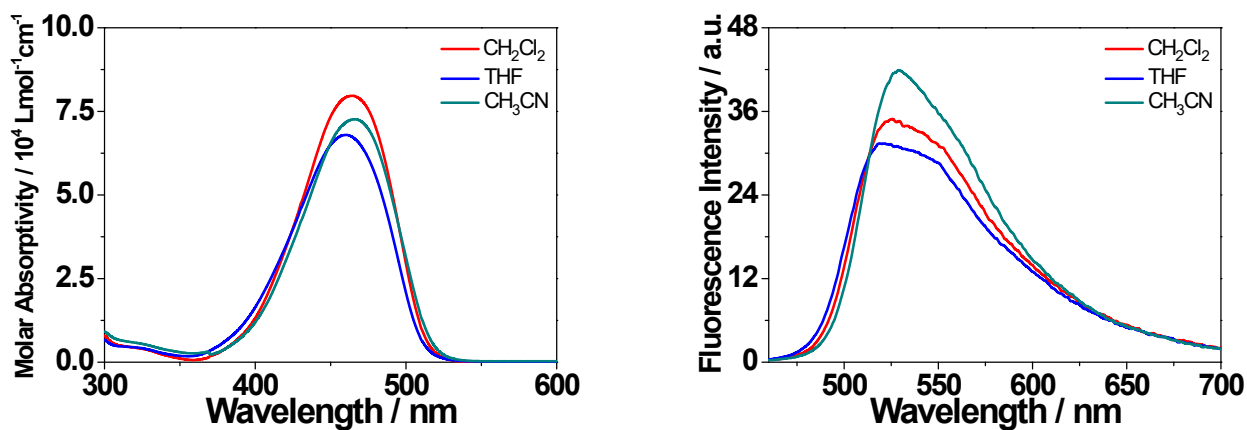

**Figure S2.** Absorption (left) and emission (right) spectra of CV6-O (20  $\mu$ M) in various organic solvents at 25  $^{\circ}$ C. Excited at 440 nm.



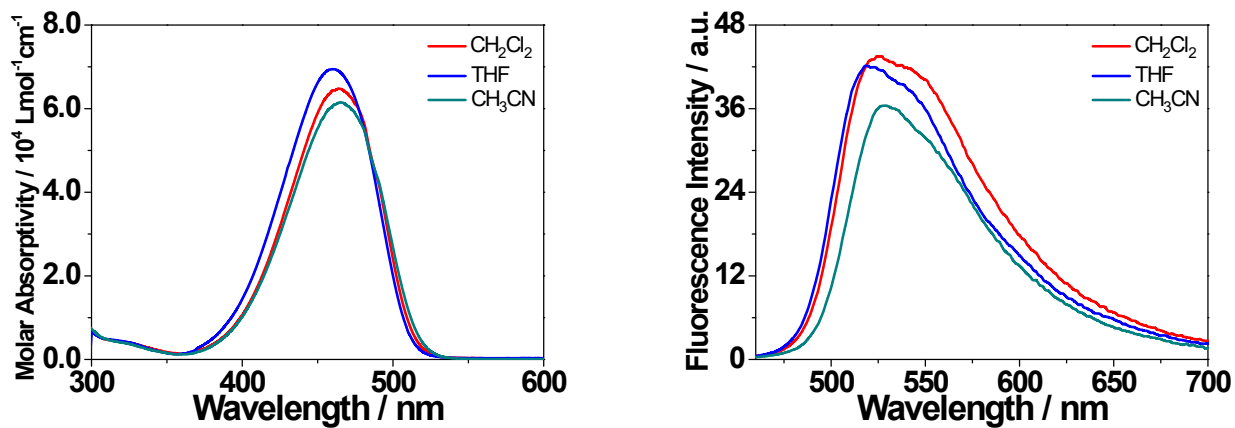

**Figure S3.** Absorption (left) and emission (right) spectra of CV8-Y (20  $\mu\text{M}$ ) in various organic solvents at 25  $^{\circ}\text{C}$ . Excited at 440 nm.

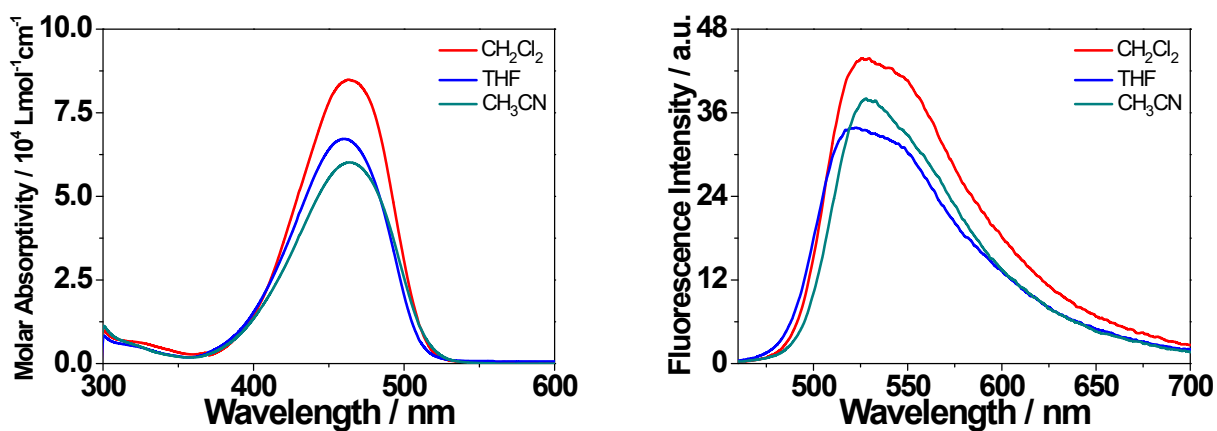

**Figure S4.** Absorption (left) and emission (right) spectra of CV10-O (20  $\mu\text{M}$ ) in various organic solvents at 25  $^{\circ}\text{C}$ . Excited at 440 nm.

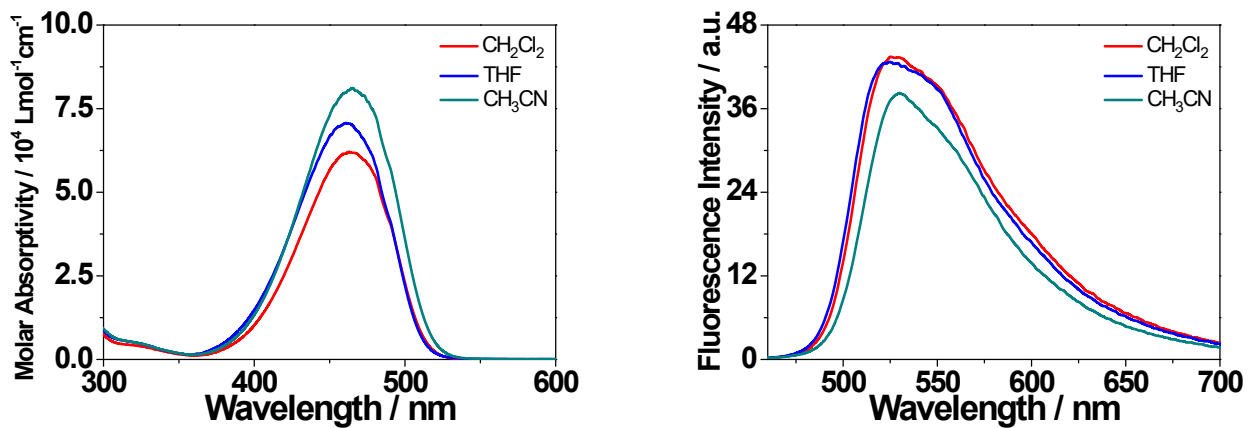

**Figure S5.** Absorption (left) and emission (right) spectra of CV16-R (20  $\mu$ M) in various organic solvents at 25  $^{\circ}$ C. Excited at 440 nm.

**(b) Comparison of absorption and emission spectra of CV $n$  dyes in CH<sub>3</sub>CN**

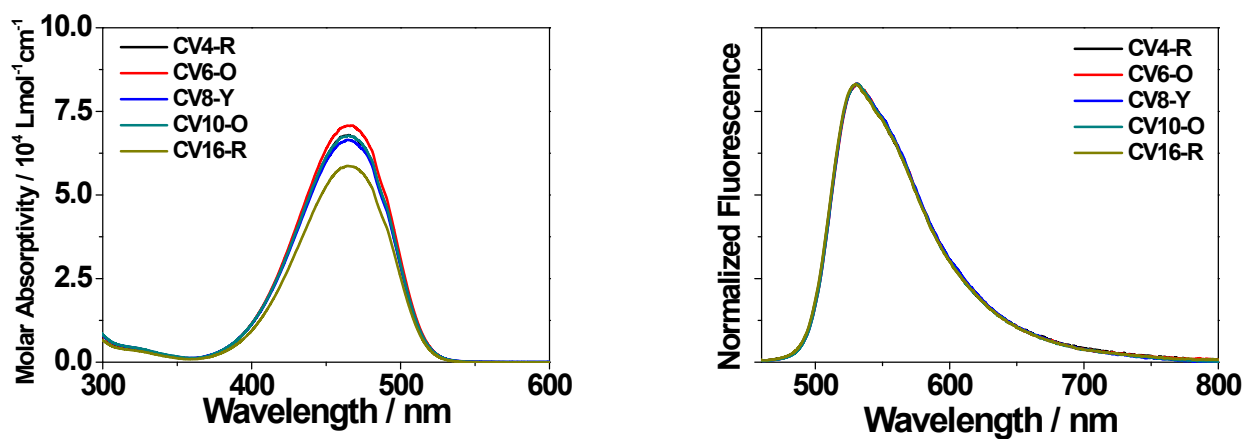

**Figure S6.** Absorption (left) and normalized emission (right) spectra of compounds in CH<sub>3</sub>CN at 25  $^{\circ}$ C. Excited at 440 nm.

(c) Comparison of emission spectra of CV8-Y in Different States

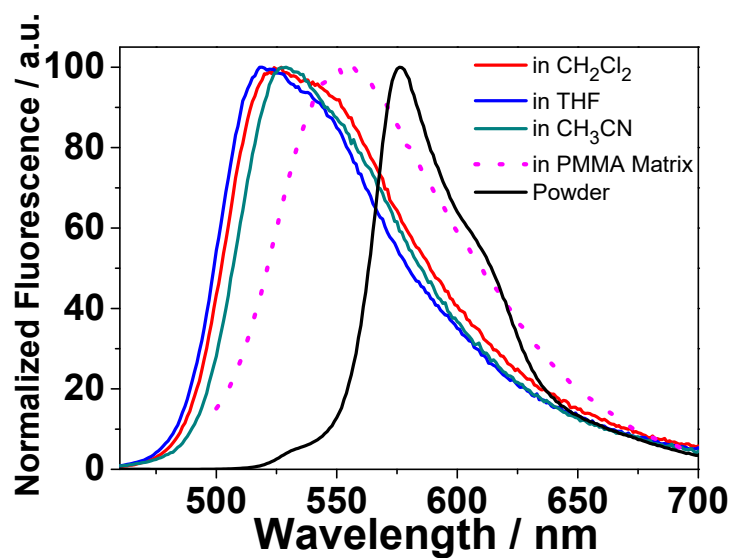

**Figure S7.** Emission spectra of CV8-Y in various organic solvents (red: CH<sub>2</sub>Cl<sub>2</sub>, blue: THF, dark green: CH<sub>3</sub>CN), in a PMMA film with 10 wt % of CV8-Y (dotted pink), and in a powder (black). Excited at 440 nm.

#### 4. Aggregation Behaviors of CVn Dyes in Aqueous Solutions

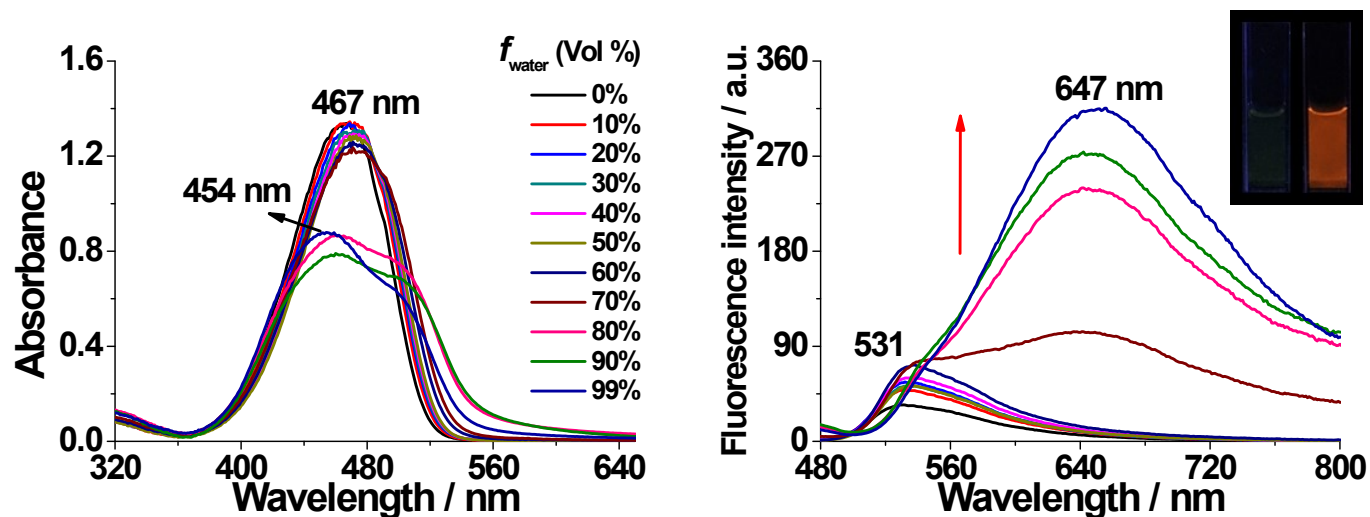

**Figure S8.** Absorption (left) and emission (right) spectra of CV4-R (20 μM) in CH<sub>3</sub>CN–water mixtures with different water fraction ( $f_{\text{water}}$ (vol%): 0–99%) at 25 °C. Excited at 440 nm. Inset shows photographs of each solution (left: CH<sub>3</sub>CN, right: CH<sub>3</sub>CN/H<sub>2</sub>O = 1:9 (v/v)) under irradiation at 365 nm.

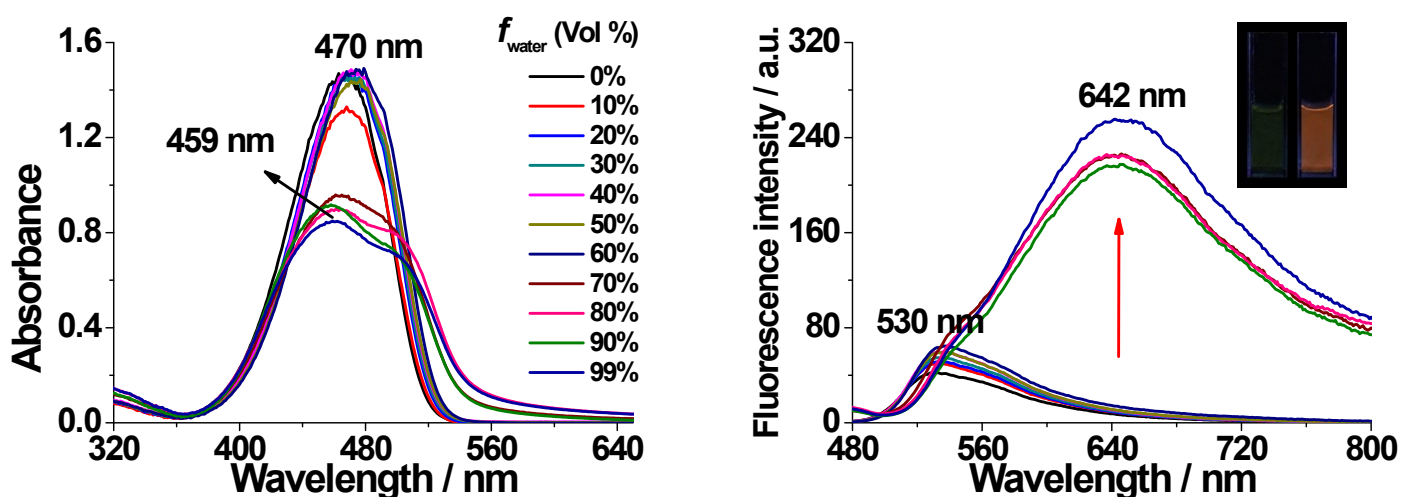

**Figure S9.** Absorption (left) and emission (right) spectra of CV6-O (20 μM) in CH<sub>3</sub>CN–water mixtures with different water fraction ( $f_{\text{water}}$ (vol%): 0–99%) at 25 °C. Excited at 440 nm. Inset shows photographs of each solution (left: CH<sub>3</sub>CN, right: CH<sub>3</sub>CN/H<sub>2</sub>O = 1:9 (v/v)) under irradiation at 365 nm.

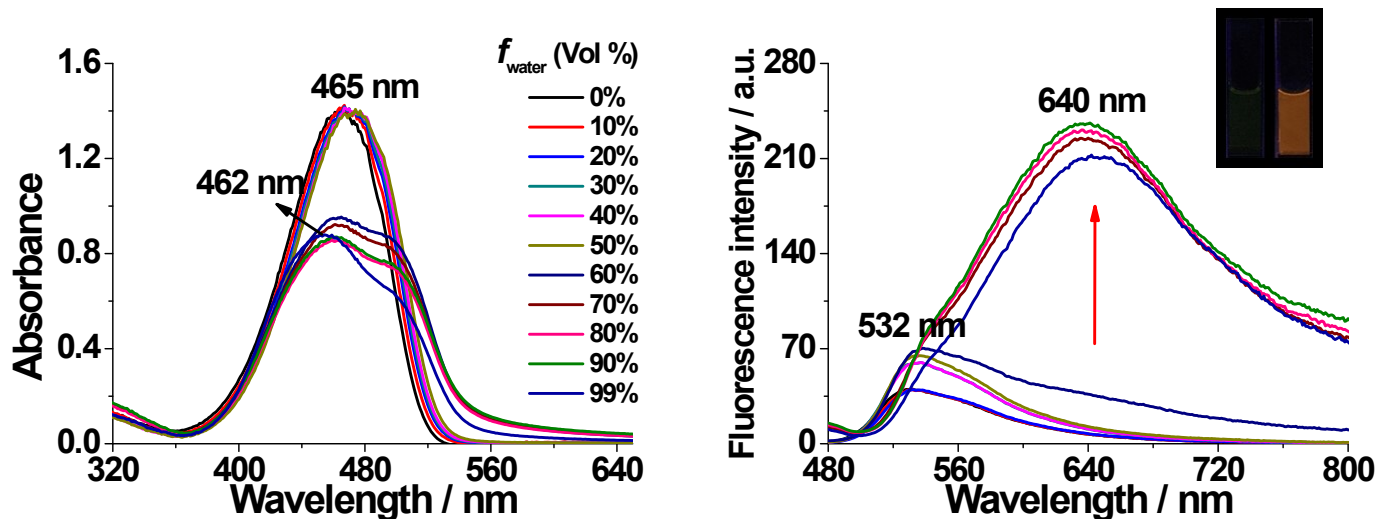

**Figure S10.** Absorption (left) and emission (right) spectra of CV8-Y (20  $\mu\text{M}$ ) in  $\text{CH}_3\text{CN}$ -water mixtures with different water fraction ( $f_{\text{water}}$ (vol%): 0–99%) at 25  $^\circ\text{C}$ . Excited at 440 nm. Inset shows photographs of each solution (left:  $\text{CH}_3\text{CN}$ , right:  $\text{CH}_3\text{CN}/\text{H}_2\text{O} = 1:9$  (v/v)) under irradiation at 365 nm.

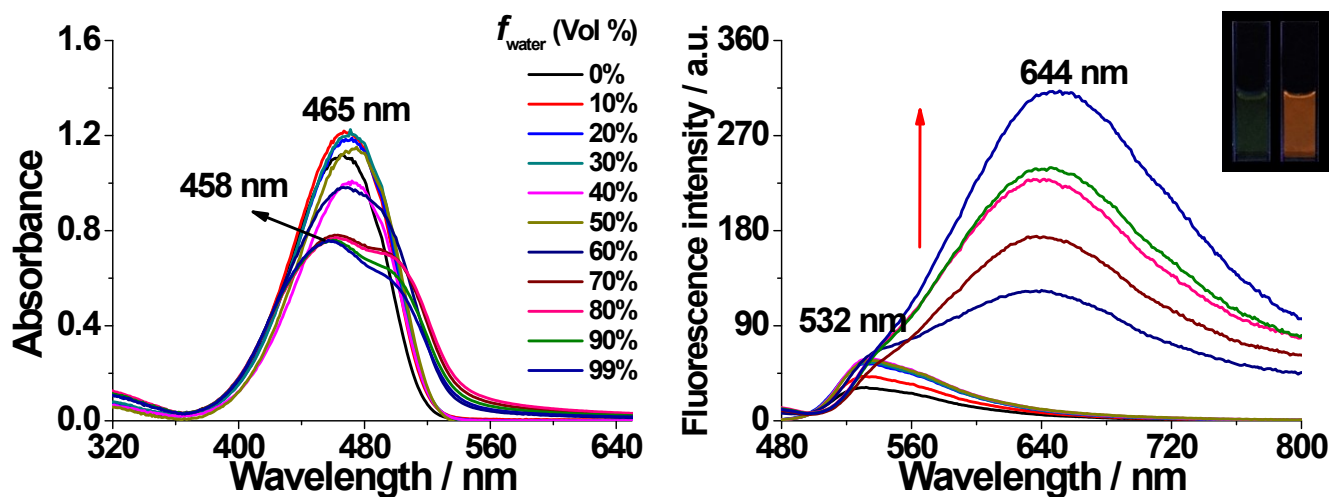

**Figure S11.** Absorption (left) and emission (right) spectra of CV10-O (20  $\mu\text{M}$ ) in  $\text{CH}_3\text{CN}$ -water mixtures with different water fraction ( $f_{\text{water}}$ (vol%): 0–99%) at 25  $^\circ\text{C}$ . Excited at 440 nm. Inset shows photographs of each solution (left:  $\text{CH}_3\text{CN}$ , right:  $\text{CH}_3\text{CN}/\text{H}_2\text{O} = 1:9$  (v/v)) under irradiation at 365 nm.

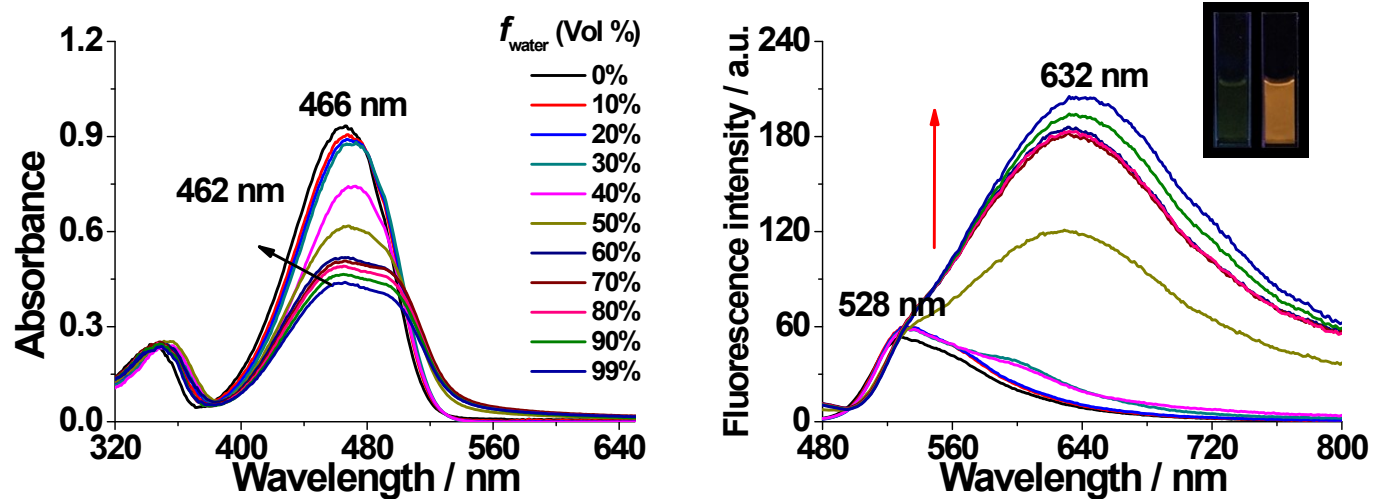

**Figure S12.** Absorption (left) and emission (right) spectra of CV16-R (20 μM) in CH<sub>3</sub>CN–water mixtures with different water fraction ( $f_{\text{water}}$ (vol%): 0–99%) at 25 °C. Excited at 440 nm. Inset shows photographs of each solution (left: CH<sub>3</sub>CN, right: CH<sub>3</sub>CN/H<sub>2</sub>O = 1:9 (v/v)) under irradiation at 365 nm.

## 5. Time-Resolved Photoluminescence Decay Dynamics

### (a) Time-resolved photoluminescence decay dynamics of CVn dyes in CH<sub>3</sub>CN

Time-resolved fluorescence decay study was carried out using a confocal microscope (MicroTime-200, Picoquant, Germany) with a 10 × (air) objective. A single-mode pulsed diode laser (470 nm with a pulse width of ~30 ps and an average power of 1~4 μW operating in 40 MHz repetition rate) was used as an excitation source. A dichroic mirror (490 DCXR, AHF), a long-pass filter (HQ500lp, AHF), a bandpass filter (500-550 nm, Thorlabs) and a single photon avalanche diode (PDM series, MPD) were used to collect emission from the samples. A time-correlated single-photon counting system (PicoHarp-300, PicoQuant GmbH, Germany) was used to count emission photons. Exponential function fitting for the obtained fluorescence decays was performed using Symphotime-64 software (Ver. 2.2).

**Table S2.** Fluorescence decays of compounds in CH<sub>3</sub>CN

| Compounds     | $\lambda_{\text{em}}$<br>[nm] | $\tau_1 (f_1)^a$<br>[ns] | $\tau_2 (f_2)^a$<br>[ns] | $\tau_3 (f_3)^a$<br>[ns] | $\tau_{\text{avg}}^b$<br>[ns] |
|---------------|-------------------------------|--------------------------|--------------------------|--------------------------|-------------------------------|
| <b>CV4-R</b>  | 530                           | 0.032<br>(0.81)          | 0.198<br>(0.19)          | 1.50<br>(0.0005)         | 0.064                         |
| <b>CV6-O</b>  | 530                           | 0.033<br>(0.81)          | 0.205<br>(0.19)          |                          | 0.065                         |
| <b>CV8-Y</b>  | 530                           | 0.031<br>(0.81)          | 0.198<br>(0.19)          | 2.30<br>(0.0005)         | 0.063                         |
| <b>CV10-O</b> | 530                           | 0.032<br>(0.81)          | 0.204<br>(0.19)          |                          | 0.064                         |
| <b>CV16-R</b> | 530                           | 0.034<br>(0.81)          | 0.205<br>(0.19)          |                          | 0.067                         |

<sup>a</sup>Lifetime ( $\tau$ ) and fraction ( $f$ ) of shorter (1) or longer (2 and 3) lived species. <sup>b</sup>Average weighted lifetimes ( $\tau_{\text{avg}}$ ) calculated by  $\langle \tau \rangle_{\text{amp}} = \{\sum (f_i * \tau_i)\} / \{\sum (f_i)\}$ . [CVn-X] = 20 μM.

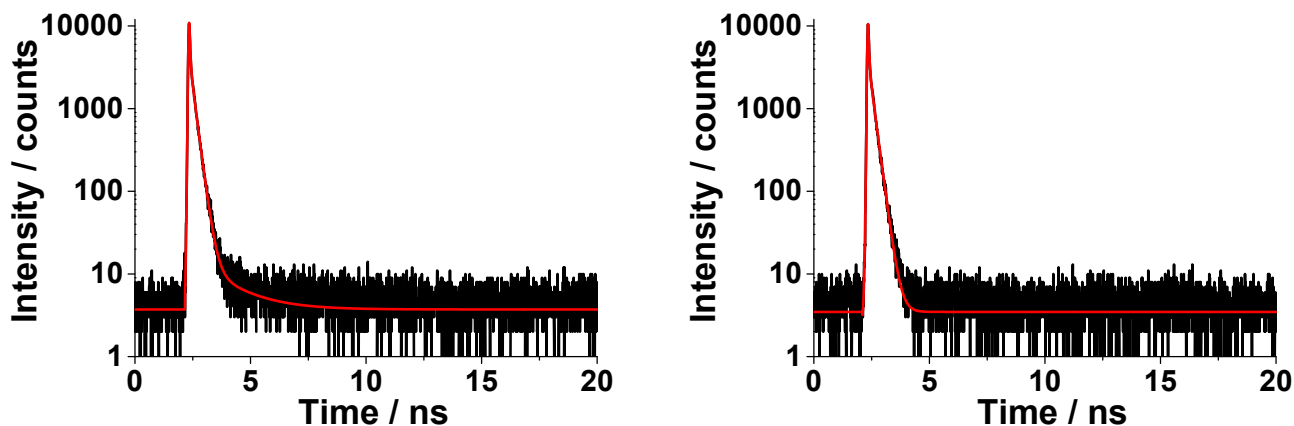

**Figure S13.** (left) Time-resolved fluorescence decays of **CV4-R** (Ex/Em = 470 nm/530 nm) in CH<sub>3</sub>CN at 25 °C. **CV4-R** tri-exponential decays gave lifetimes of 0.032 ns (81%), 0.198 ns (19%) and 1.50 ns (0.05%). Average time is 0.064 ns. (right) Time-resolved fluorescence decays of **CV6-O** (Ex/Em = 470 nm/530 nm) in CH<sub>3</sub>CN at 25 °C. **CV6-O** bi-exponential decays gave lifetimes of 0.033 ns (81%) and 0.205 ns (19%). Average time is 0.065 ns.

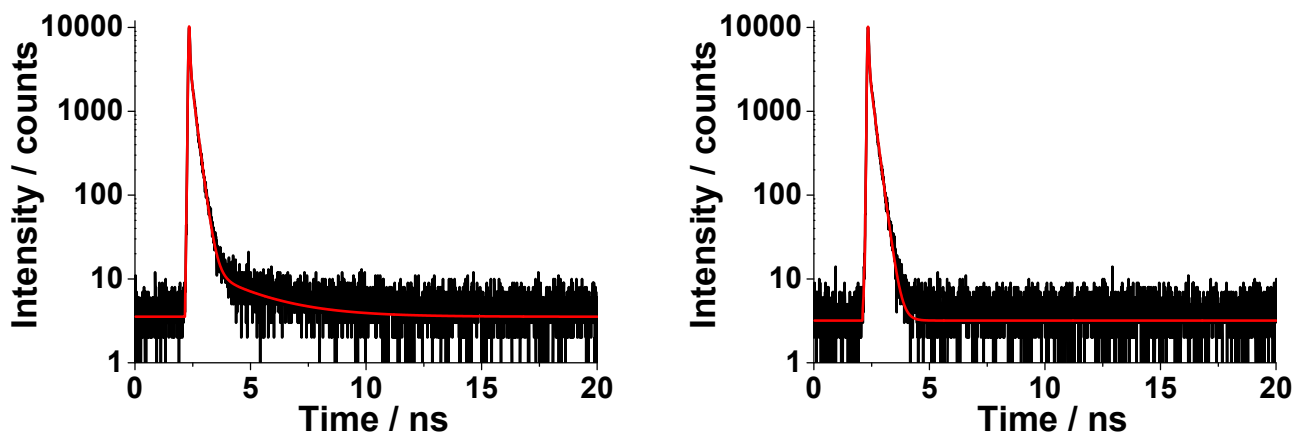

**Figure S14.** (left) Time-resolved fluorescence decays of **CV8-Y** (Ex/Em = 470 nm/530 nm) in CH<sub>3</sub>CN at 25 °C. **CV8-Y** tri-exponential decays gave lifetimes of 0.031 ns (81%), 0.198 ns (19%) and 2.30 ns (0.05%). Average time is 0.063 ns. (right) Time-resolved fluorescence decays of **CV10-O** (Ex/Em = 470 nm/530 nm) in CH<sub>3</sub>CN at 25 °C. **CV10-O** bi-exponential decays gave lifetimes of 0.032 ns (81%) and 0.204 ns (19%). Average time is 0.064 ns.



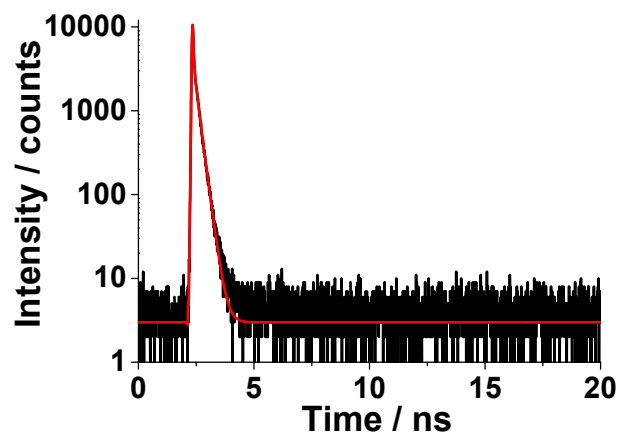

**Figure S15.** Time-resolved fluorescence decays of CV16-R (Ex/Em = 470 nm/530 nm) in CH<sub>3</sub>CN at 25 °C. CV16-R bi-exponential decays gave lifetimes of 0.034 ns (81%) and 0.205 ns (19%). Average time is 0.067 ns.

## (b) Time-resolved photoluminescence decay dynamics of CV*n* dyes in solid powder

Fluorescence lifetime decays for **CV6-O**, **CV8-Y**, **CV10-O** and **CV16-R** were measured using an inverted-type scanning confocal microscope (MicroTime-200, Picoquant, Germany) with a 20 × objective. A 470 nm single-mode pulsed diode laser (~100 ps pulse width) was used as an excitation source. A dichroic mirror (490 DCXR, AHF), a long-pass filter (HQ500lp, AHF), a 50 μm pinhole, and a single photon avalanche diode (PDM series, MPD) were used to collect emissions from the samples. Time-correlated single-photon counting technique was used to obtain fluorescence decay curves as a function of time with a resolution of 16 ps. Exponential fittings for the obtained fluorescence decays were performed by the iterative least-squares deconvolution fitting using the Symphotime software (version 5.3). Fluorescence lifetime decays for **CV4-R** was conducted using an inverted-type scanning confocal microscope (SP8 FALCON, Leica Microsystems, Germany) with a 40 × (air) objective lens. A 470 nm picosecond laser line (10 MHz, PicoQuant, Germany) was used as an excitation source. A hybrid photon detector was used to collect emissions at 630±20 and 650±30 nm from the samples. The confocal and PL lifetime images of 512×512 pixels were simultaneously recorded using a galvo-stage and time-correlated single-photon counting technique. Exponential fittings for the recorded PL decay profiles were performed using the suited Leica software (LAS X Ver.3.5.5).

**Table S3.** Fluorescence decays of CV*n* dyes in solid powder

| Compounds     | $\lambda_{em}$<br>[nm] | $\tau_1 (f_1)^a$<br>[ns] | $\tau_2 (f_2)^a$<br>[ns] | $\tau_{avg}^b$<br>[ns] |
|---------------|------------------------|--------------------------|--------------------------|------------------------|
| <b>CV4-R</b>  | 630                    | 3.57<br>(0.35)           | 8.23<br>(0.65)           | 6.59                   |
| <b>CV6-O</b>  | 590                    | 6.39<br>(0.50)           | 2.80<br>(0.50)           | 4.60                   |
| <b>CV8-Y</b>  | 580                    | 2.29<br>(0.27)           | 1.33<br>(0.73)           | 1.59                   |
| <b>CV10-O</b> | 590                    | 2.52<br>(0.74)           | 0.53<br>(0.26)           | 2.00                   |
| <b>CV16-R</b> | 670                    | 5.45<br>(1.00)           |                          | 5.45                   |

<sup>a</sup>Lifetime ( $\tau$ ) and fraction ( $f$ ) of shorter (1) or longer (2) lived species. <sup>b</sup>Average weighted lifetimes ( $\tau_{avg}$ ) calculated by  $\langle\tau\rangle_{amp} = \{\sum (f_i*\tau_i)\}/\{\sum(f_i)\}$ .

**Table S4.** Fluorescence decays of CV*n* dyes (powered solids) upon external stimuli (heat, pressure, vapor)

| Compd         | Treatment Conditions                     | $\lambda_{em}^{max}$ [nm] |                     |                     |
|---------------|------------------------------------------|---------------------------|---------------------|---------------------|
|               |                                          | $(\tau_{avg}^a$ [ns])     |                     |                     |
|               |                                          | <b>A</b>                  | <b>B</b>            | <b>C</b>            |
| <b>CV4-R</b>  | Initial (A) → Annealing (B) → Fuming (C) | 632 nm<br>(6.59 ns)       | 640 nm<br>(4.54 ns) | 634 nm<br>(7.53 ns) |
|               | Initial (A) → Grinding (B) → Fuming(C)   | 632 nm<br>(6.59 ns)       | 642 nm<br>(4.31 ns) | 629 nm<br>(4.15 ns) |
| <b>CV8-Y</b>  | Initial (A) → Annealing (B) → Fuming (C) | 576 nm<br>(1.59 ns)       | 654 nm<br>(4.50 ns) | 570 nm<br>(1.18 ns) |
|               | Initial (A) → Grinding (B) → Fuming (C)  | 576 nm<br>(1.59 ns)       | 662 nm<br>(3.92 ns) | 566 nm<br>(1.00 ns) |
| <b>CV16-R</b> | Initial (A) → Annealing (B) → Fuming (C) | 671 nm<br>(5.45 ns)       | 663 nm<br>(4.80 ns) | 671 nm<br>(4.86 ns) |
|               | Initial (A) → Grinding (B) → Fuming(C)   | 671 nm<br>(5.45 ns)       | 595 nm<br>(3.51 ns) | 670 nm<br>(4.61 ns) |

<sup>a</sup>Average weighted lifetimes ( $\tau_{avg}$ ) calculated by  $\langle\tau\rangle_{amp} = \{\sum (f_i*\tau_i)\}/\{\sum(f_i)\}$ .

**Table S5.** Fluorescence quantum yields ( $\Phi_{\text{FL}}$ ) of **CV $n$**  dyes (powered solids) upon external stimuli (heat, pressure, vapor)

| Compd         | Treatment Conditions                                             | $\Phi_{\text{FL}}$ |                   |                   |
|---------------|------------------------------------------------------------------|--------------------|-------------------|-------------------|
|               |                                                                  | A                  | B                 | C                 |
| <b>CV4-R</b>  | Initial (A) $\rightarrow$ Annealing (B) $\rightarrow$ Fuming (C) | 0.162 $\pm$ 0.008  | 0.088 $\pm$ 0.006 | 0.146 $\pm$ 0.008 |
|               | Initial (A) $\rightarrow$ Grinding (B) $\rightarrow$ Fuming(C)   | 0.162 $\pm$ 0.008  | 0.058 $\pm$ 0.005 | 0.135 $\pm$ 0.004 |
| <b>CV6-O</b>  | Initial (A) $\rightarrow$ Annealing (B) $\rightarrow$ Fuming (C) | 0.175 $\pm$ 0.003  | 0.049 $\pm$ 0.006 | 0.124 $\pm$ 0.003 |
|               | Initial (A) $\rightarrow$ Grinding (B) $\rightarrow$ Fuming(C)   | 0.175 $\pm$ 0.003  | 0.065 $\pm$ 0.002 | 0.212 $\pm$ 0.007 |
| <b>CV8-Y</b>  | Initial (A) $\rightarrow$ Annealing (B) $\rightarrow$ Fuming (C) | 0.402 $\pm$ 0.012  | 0.062 $\pm$ 0.003 | 0.324 $\pm$ 0.009 |
|               | Initial (A) $\rightarrow$ Grinding (B) $\rightarrow$ Fuming (C)  | 0.402 $\pm$ 0.012  | 0.067 $\pm$ 0.003 | 0.302 $\pm$ 0.005 |
| <b>CV10-O</b> | Initial (A) $\rightarrow$ Annealing (B) $\rightarrow$ Fuming (C) | 0.198 $\pm$ 0.014  | 0.051 $\pm$ 0.003 | 0.151 $\pm$ 0.006 |
|               | Initial (A) $\rightarrow$ Grinding (B) $\rightarrow$ Fuming(C)   | 0.198 $\pm$ 0.014  | 0.063 $\pm$ 0.003 | 0.233 $\pm$ 0.012 |
| <b>CV16-R</b> | Initial (A) $\rightarrow$ Annealing (B) $\rightarrow$ Fuming (C) | 0.070 $\pm$ 0.007  | 0.061 $\pm$ 0.002 | 0.065 $\pm$ 0.007 |
|               | Initial (A) $\rightarrow$ Grinding (B) $\rightarrow$ Fuming(C)   | 0.070 $\pm$ 0.007  | 0.167 $\pm$ 0.006 | 0.062 $\pm$ 0.001 |

<sup>a</sup>Absolute fluorescence quantum yield in the solid state evaluated using an integrating sphere.

(c) Fluorescence decays of solid powder CV4-R upon external stimuli (heating-fuming process and grinding-fuming process)

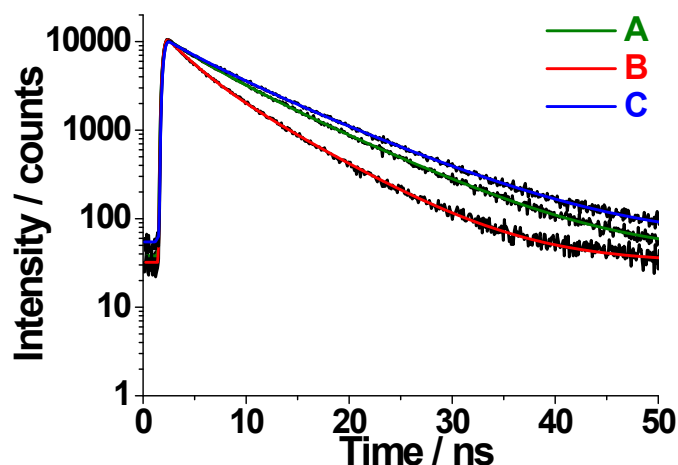

**Figure S16.** Time-resolved emission decays of solid powder CV4-R in different conditions. (A) Initial, as-prepared solid powder, CV4-R bi-exponential decays gave lifetimes of 3.57 ns (35%) and 8.23 ns (65%). Average time is 6.59 ns. (B) Heating at 124 °C for 1 min and cooling to RT, CV4-R bi-exponential decays gave lifetimes of 2.52 ns (51%) and 6.61 ns (49%). Average time is 4.54 ns. (C) Subsequent fuming with CH<sub>2</sub>Cl<sub>2</sub> vapor at RT, CV4-R bi-exponential decays gave lifetimes of 4.31 ns (33%) and 9.13 ns (49%). Average time is 7.53 ns.

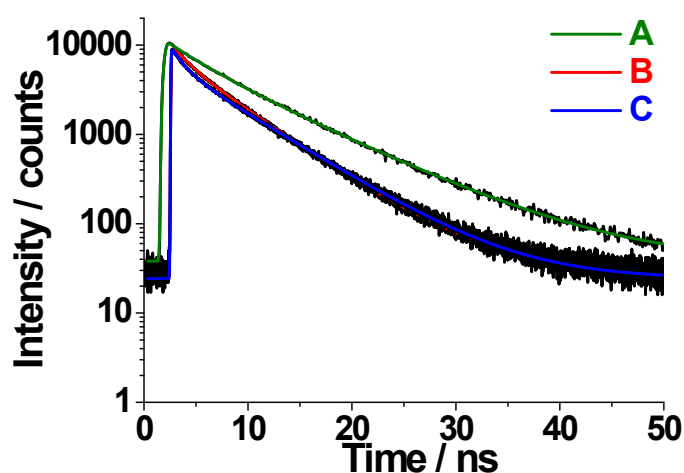

**Figure S17.** Time-resolved emission decays of solid powder CV4-R in different conditions. (A) Initial, as-prepared solid powder, CV4-R bi-exponential decays gave lifetimes of 3.57 ns (35%) and 8.23 ns (65%). Average time is 6.59 ns. (B) Grinding at RT, CV4-R bi-exponential decays gave lifetimes of 5.56 ns (68%) and 1.66 ns (32%). Average time is 4.31 ns. (C) Subsequent fuming with CH<sub>2</sub>Cl<sub>2</sub> vapor at RT, CV4-R bi-exponential decays gave lifetimes of 6.06 ns (60%) and 1.24 ns (40%). Average time is 4.15 ns.

(d) Fluorescence decays of solid powder CV8-Y upon external stimuli (heating-fuming process and grinding-fuming process)

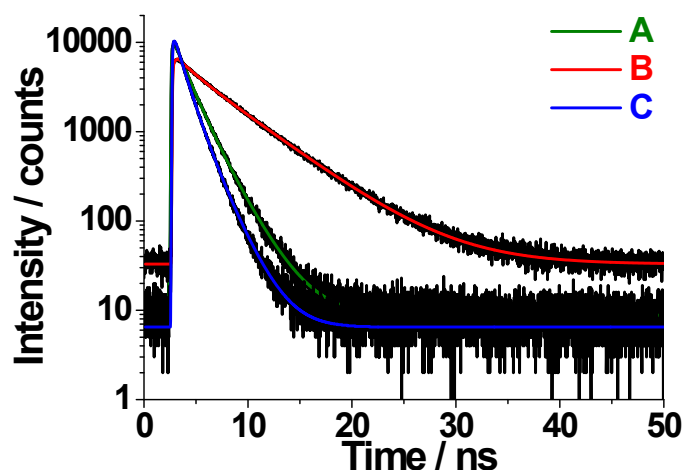

**Figure S18.** Time-resolved emission decays of solid powder CV8-Y in different conditions. (A) Initial, as-prepared solid powder, CV8-Y bi-exponential decays gave lifetimes of 2.29 ns (27%) and 1.33 ns (73%). Average lifetime of 1.59 ns. (B) Heating at 98 °C for 1 min and cooling to RT, CV8-Y bi-exponential decays gave lifetimes of 5.12 ns (82%) and 1.62 ns (18%). Average lifetime of 4.50 ns. (C) Subsequent fuming with CH<sub>2</sub>Cl<sub>2</sub> vapor at RT, CV8-Y bi-exponential decays gave lifetimes of 1.83 ns (22%) and 1.00 ns (78%). Average lifetime of 1.18 ns.

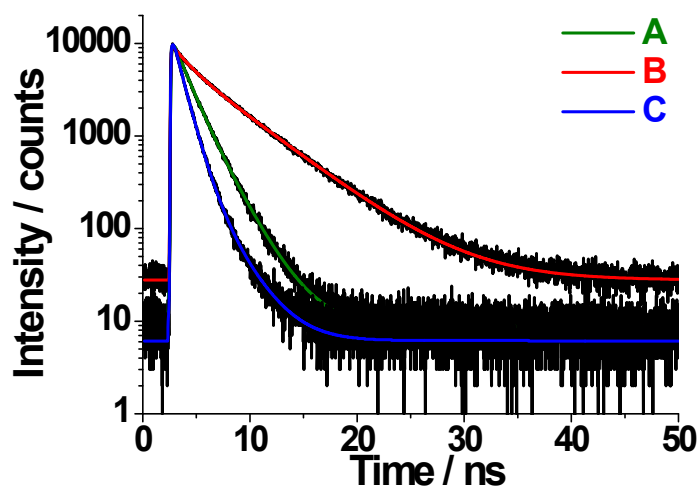

**Figure S19.** Time-resolved emission decays of solid powder CV8-Y in different conditions. (A) Initial, as-prepared solid powder, CV8-Y bi-exponential decays gave lifetimes of 2.29 ns (27%) and 1.33 ns (73%). Average lifetime of 1.59 ns. (B) Grinding at RT, CV8-Y bi-exponential decays gave lifetimes of 5.01 ns (69%) and 1.47 ns (31%). Average lifetime of 3.92 ns. (C) Subsequent fuming with CH<sub>2</sub>Cl<sub>2</sub> vapor at RT, CV8-Y bi-exponential decays gave lifetimes of 2.29 ns (6%) and 0.91 ns (97%). Average lifetime of 1.00 ns.

(e) Fluorescence decays of solid powder CV16-R upon external stimuli (heating-fuming process and grinding-fuming process)

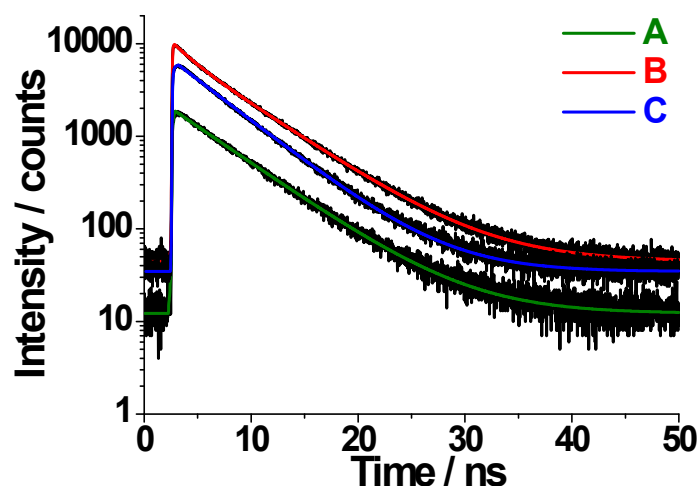

**Figure S20.** Time-resolved emission decays of solid powder CV16-R in different conditions. (A) Initial, as-prepared solid powder, CV16-R mono-exponential decays gave lifetime of 5.45 ns (100%). (B) Heating at 92 °C for 1 min and cooling to RT, CV16-R bi-exponential decays gave lifetimes of 5.66 ns (78%) and 1.72 ns (22%). Average lifetime of 4.80 ns. (C) Subsequent fuming with CH<sub>2</sub>Cl<sub>2</sub> vapor at RT, CV16-R mono-exponential decays gave lifetime of 4.86 ns (100%).

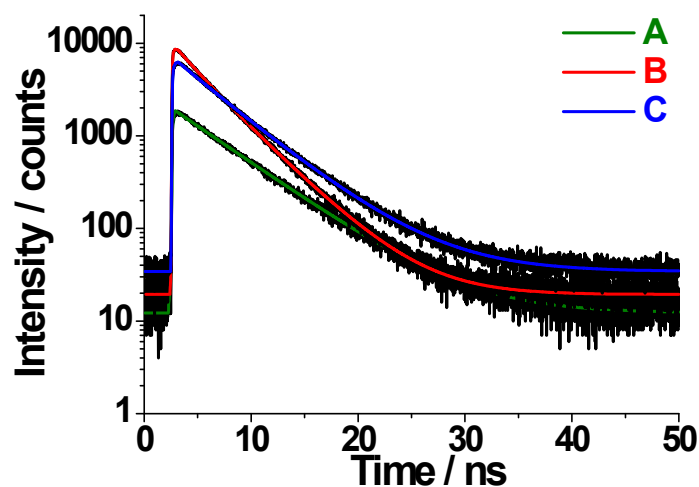

**Figure S21.** Time-resolved emission decays of solid powder CV16-R in different conditions. (A) Initial, as-prepared solid powder, CV16-R mono-exponential decays gave lifetime of 5.45 ns (100%). (B) Grinding at RT, CV16-R bi-exponential decays gave lifetimes of 4.05 ns (67%) and 2.39 ns (33%). Average lifetime of 3.51 ns. (C) Subsequent fuming with CH<sub>2</sub>Cl<sub>2</sub> vapor at RT, CV16-R bi-exponential decays gave lifetimes of 5.47 ns (47%) and 3.86 ns (53%). Average lifetime of 4.61 ns.

(f) Fluorescence decays of solid powder CV6-O

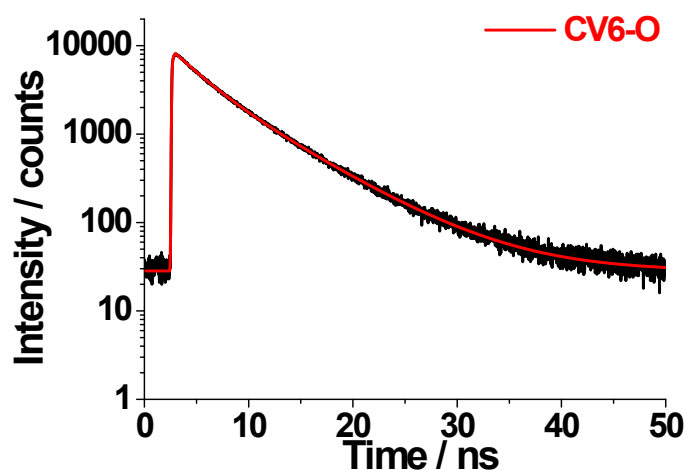

**Figure S22.** Time-resolved emission decays of as-prepared solid powder CV6-O. CV6-O bi-exponential decays gave lifetimes of 6.39 ns (50%) and 2.80 ns (50%). Average lifetime of 4.60 ns.

(g) Fluorescence decays of solid powder CV10-O

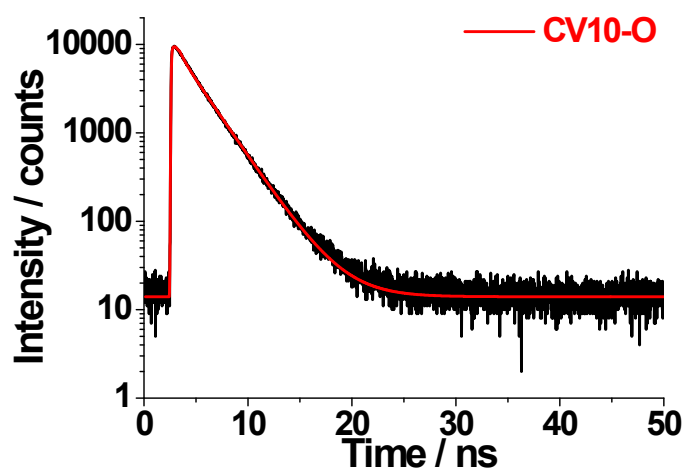

**Figure S23.** Time-resolved emission decays of as-prepared solid powder CV10-O. CV10-O bi-exponential decays gave lifetimes of 2.52 ns (74%) and 0.53 ns (26%). Average lifetime of 2.00 ns.

## 6. Thermochromic and Mechanochromic Effects

### (a) Mechanochromic effect of solid powder CV4-R

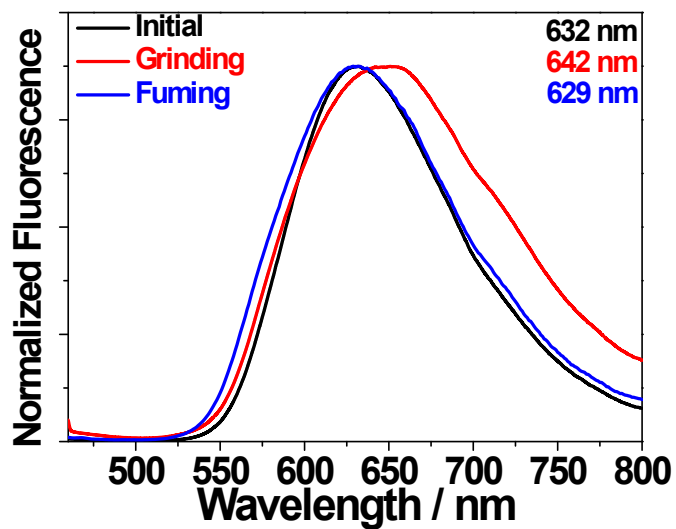

**Figure S24.** Normalized fluorescence emission spectra of CV4-R (black) as-prepared solid powder, (red) ground with spatula, and (blue) the same sample subsequently fumed with  $\text{CH}_2\text{Cl}_2$  for 20 min. Excited at 440 nm.



(b) Thermochromic and mechanochromic effect of solid powder CV6-O

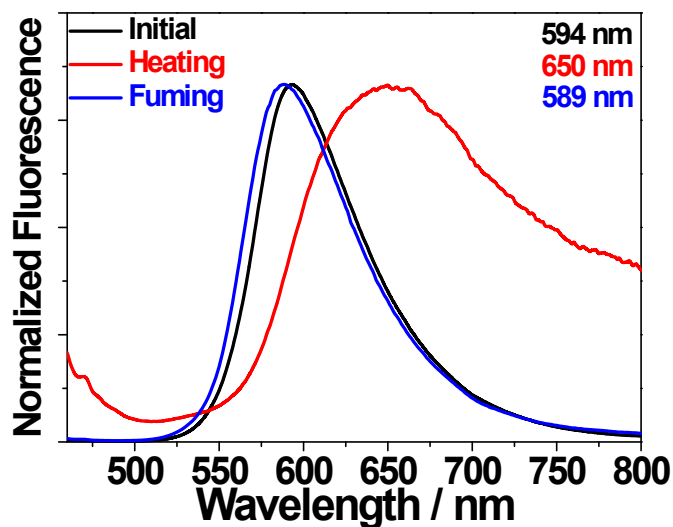

**Figure S25.** Normalized fluorescence emission spectra of CV6-O (black) as-prepared solid powder, (red) heated at 122 °C for 1 min and followed by cooling to RT, and (blue) the same sample subsequently fumed with CH<sub>2</sub>Cl<sub>2</sub> for 20 min. Excited at 440 nm.

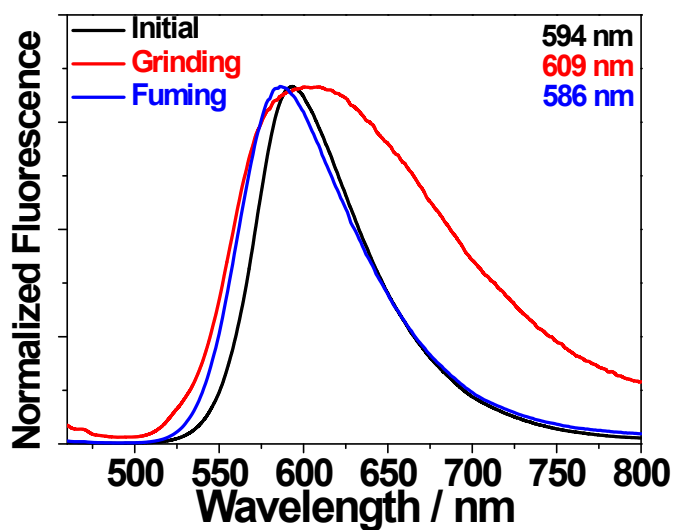

**Figure S26.** Normalized fluorescence emission spectra of CV6-O (black) as-prepared solid powder, (red) ground with spatula, and (blue) the same sample subsequently fumed with CH<sub>2</sub>Cl<sub>2</sub> for 20 min. Excited at 440 nm.

(c) Thermochromic and mechanochromic effect of solid powder CV10-O

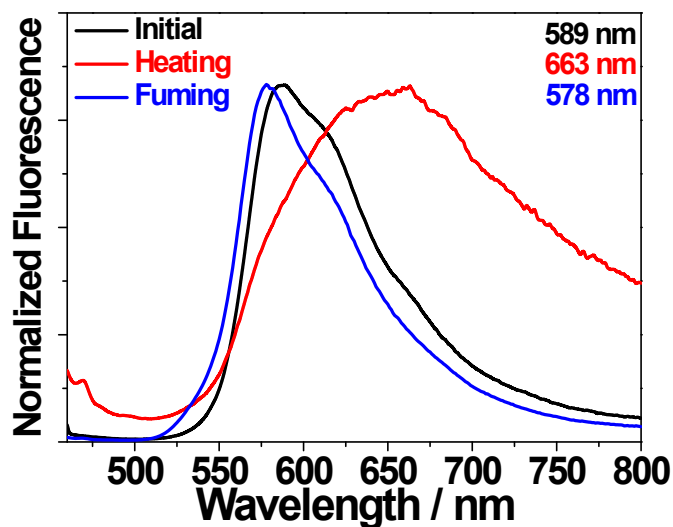

**Figure S27.** Normalized fluorescence emission spectra of CV10-O (a) as-prepared powder (black solid-line), (b) heated at 112 °C for 1 min and followed by cooling to RT (red solid-line), and (c) the same sample subsequently fumed with CH<sub>2</sub>Cl<sub>2</sub> for 20 min (red dotted-line). Excited at 440 nm.

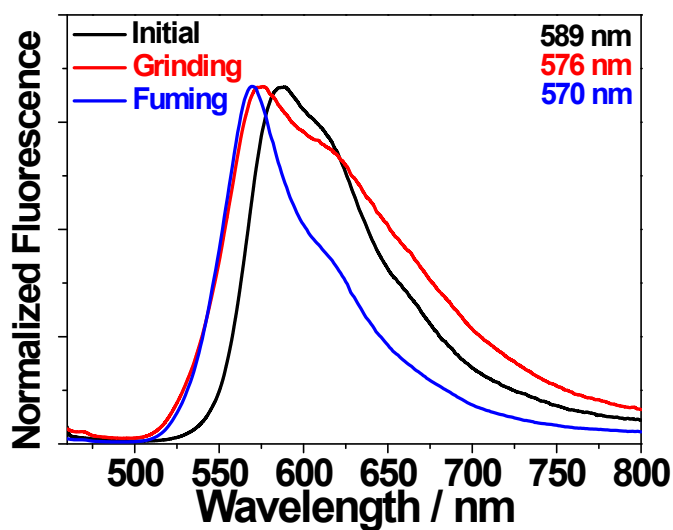

**Figure S28.** Normalized fluorescence emission spectra of CV10-O (a) as-prepared powder (black solid-line), (b) ground with spatula (blue solid-line), and (c) the same sample subsequently fumed with CH<sub>2</sub>Cl<sub>2</sub> for 20 min (blue dotted-line). Excited at 440 nm.

(d) Thermochromic and mechanochromic effect of solid powder CV16-R

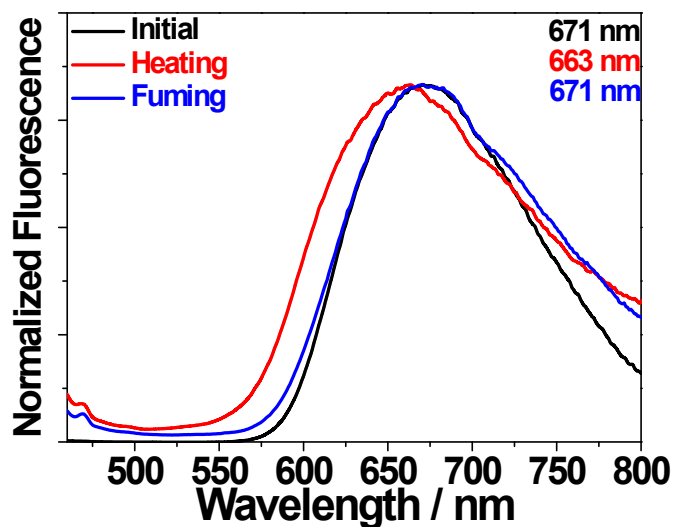

**Figure S29.** Normalized fluorescence emission spectra of CV16-R (a) as-prepared powder (black solid-line), (b) heated at 92 °C for 1 min and followed by cooling to RT (red solid-line), and (c) the same sample subsequently fumed with CH<sub>2</sub>Cl<sub>2</sub> for 20 min (red dotted-line). Excited at 440 nm.

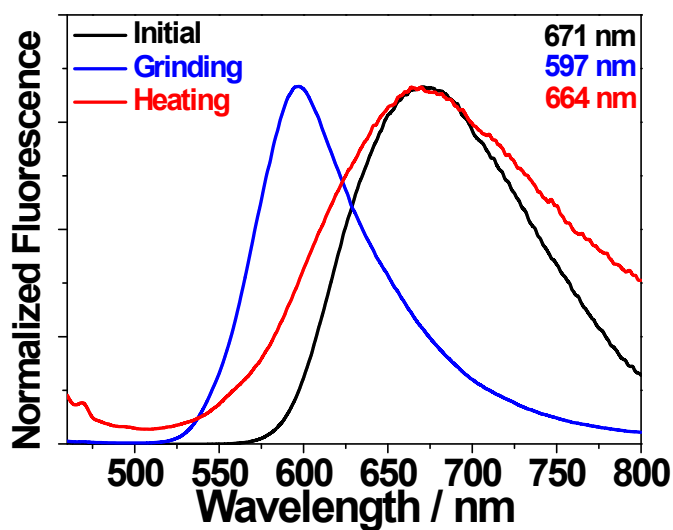

**Figure S30.** Normalized fluorescence emission spectra of CV16-R (a) as-prepared powder (black), (b) ground with spatula (blue), (c) the same sample subsequently heated at 92 °C for 1 min and followed by cooling to RT (red). Excited at 440 nm.

(e) Emission spectrum of red-emitting CV6-R single crystal

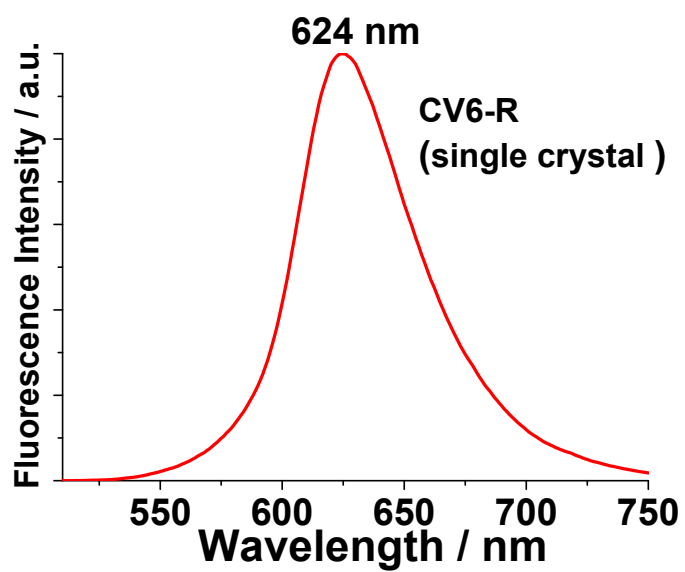

**Figure S31.** Fluorescence emission spectra of red-emitting CV6-R single crystal. Excited at 440 nm.

## 7. Differential Scanning Calorimetry (DSC) Measurements

### (a) DSC analysis of CV4-R and CV8-Y solid powders

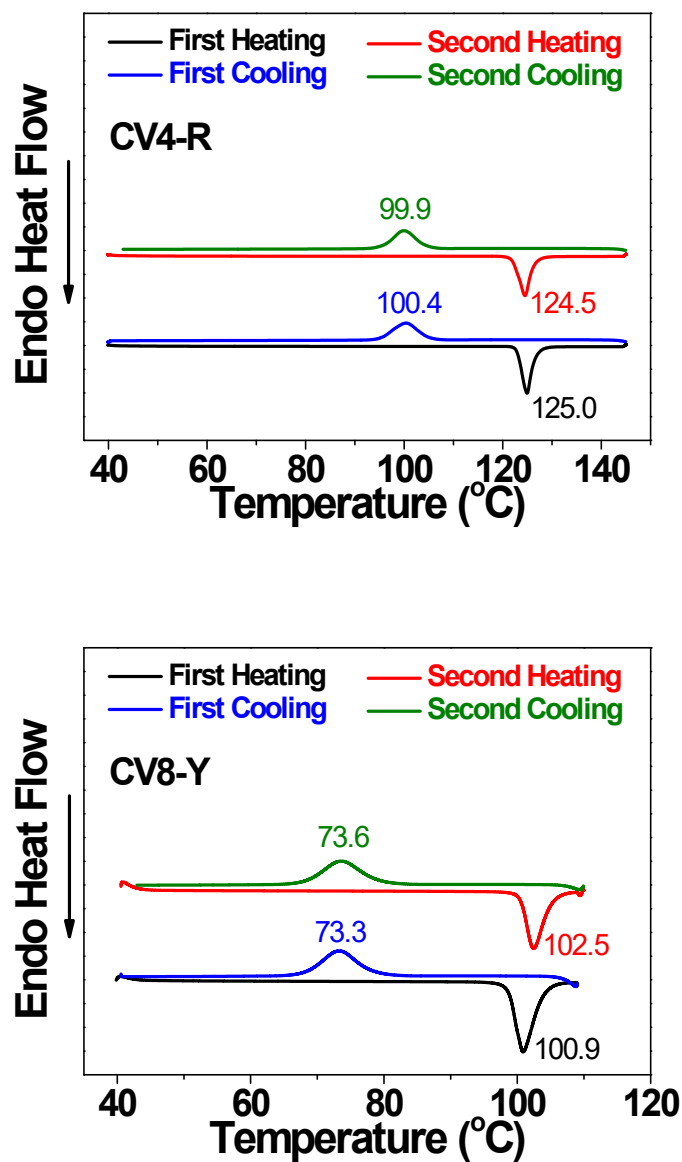

**Figure S32.** Differential scanning calorimetry curves of CV4-R (top) and CV8-Y (bottom) under the heating rate of 10 °C/min: 1<sup>st</sup> heating-cooling cycle (black and blue, respectively) and 2<sup>nd</sup> heating-cooling cycle (red and green, respectively) of as-prepared solid powders CV4-R (top) and CV8-Y (bottom).

(b) DSC analysis of solid powder CV8-Y in different states

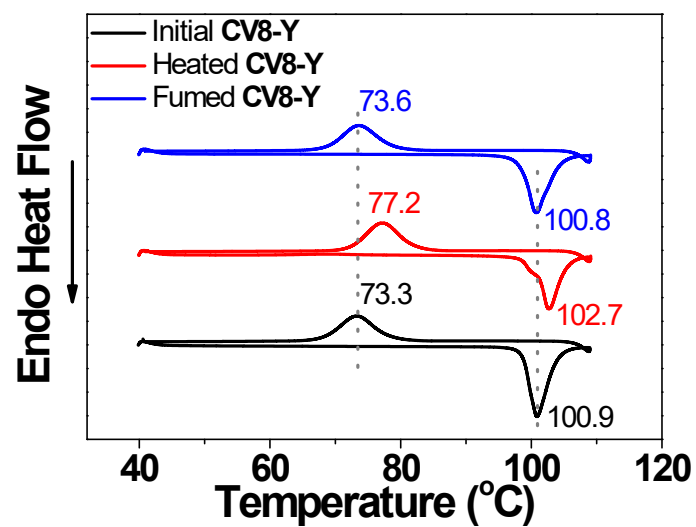

**Figure S33.** DSC thermograms of solid powder CV8-Y under the heating rate of 10 °C/min: As-prepared solid powder (black), heating at 98 °C for 1 min and cooling to RT (red), and the same sample subsequently fumed with CH<sub>2</sub>Cl<sub>2</sub> at RT for 20 min (blue).

## 8. Powder X-ray Diffraction (PXRD) Analysis

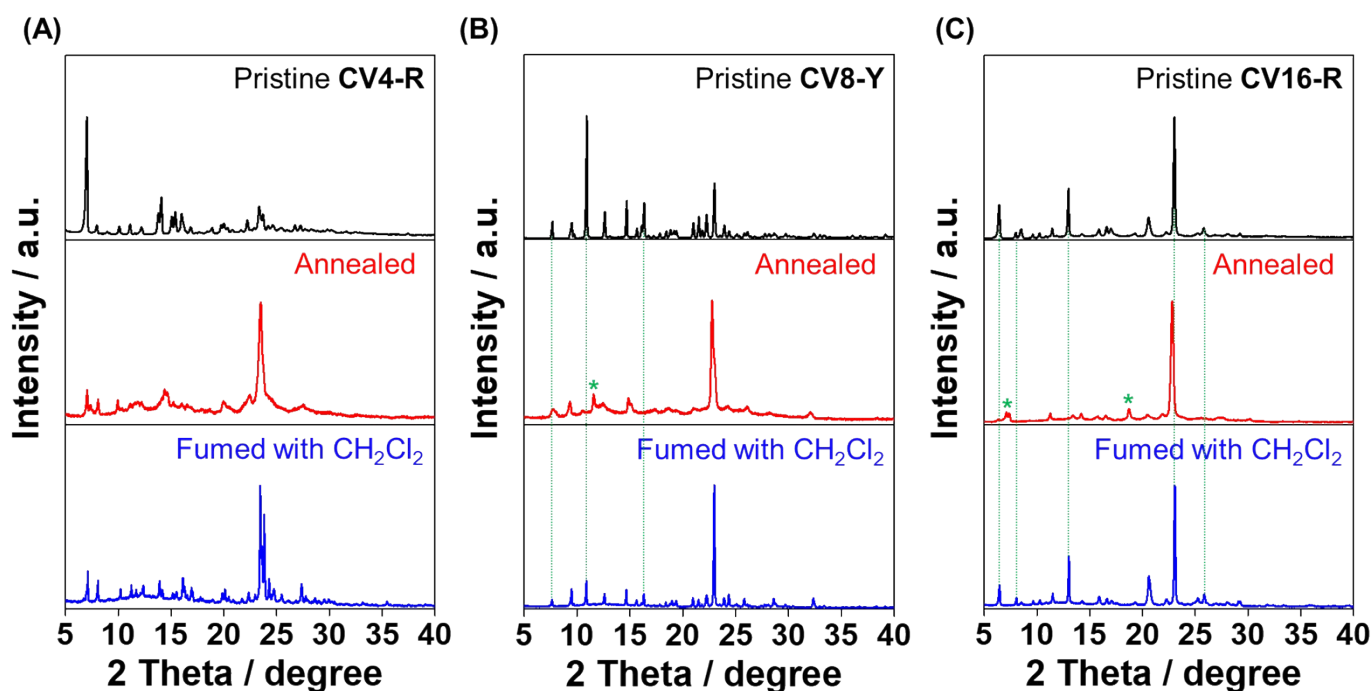

**Figure S34.** Powder X-ray diffraction patterns of CV4-R (A), CV8-Y (B) and CV16-R (C) in different states. As-prepared solid powder (black), after heating at melting temperature for 1 min and cooling to RT (red), and the same sample subsequently exposed to  $\text{CH}_2\text{Cl}_2$  for 20 min (blue). Green dot line indicates changes in diffraction peaks. Green \* indicates new peaks appeared.

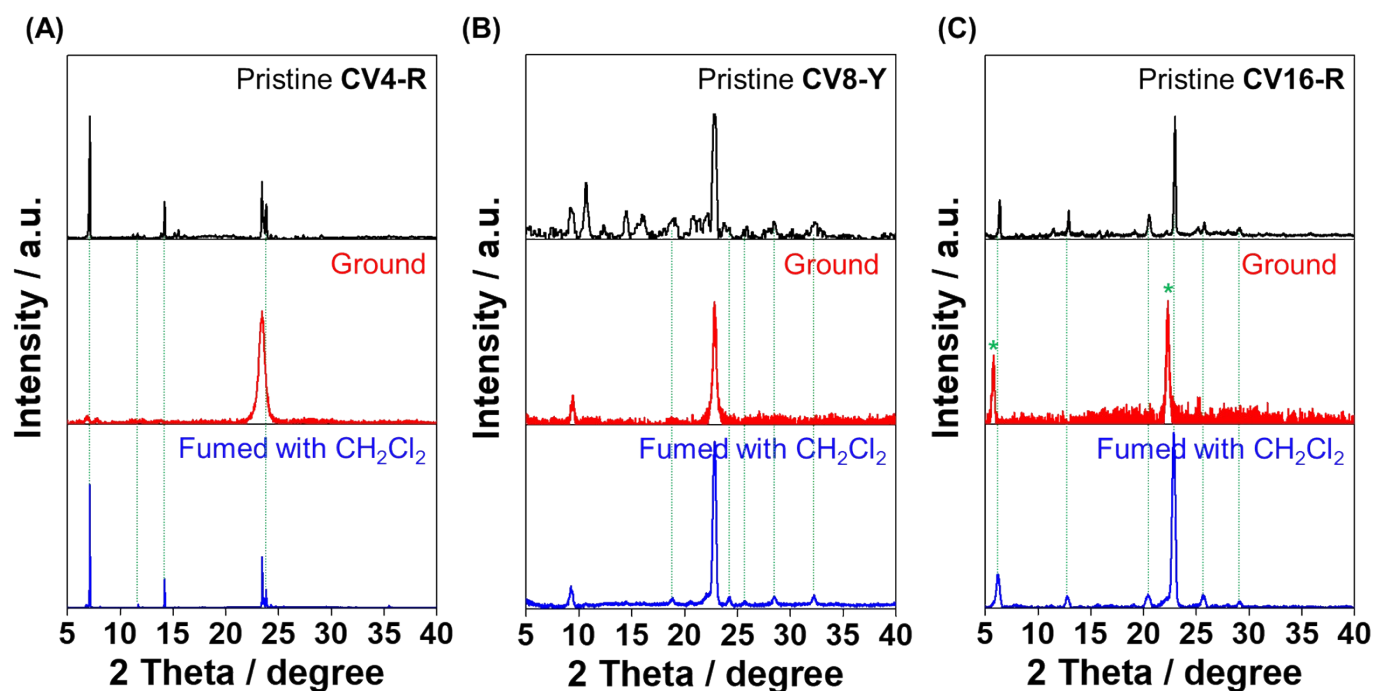

**Figure S35.** Powder X-ray diffraction patterns of CV4-R (A), CV8-Y (B) and CV16-R (C) in different states. As-prepared solid powder (black), after grinding with a spatula (red), and the same sample subsequently exposed to  $\text{CH}_2\text{Cl}_2$  for 20 min (blue). Green dot line indicates changes in diffraction peaks. Green \* indicates new peaks appeared.

## 9. X-ray Crystallographic Data for CVn Dyes

Single crystals suitable for X-ray structure analysis were obtained by slow evaporation from 1,2-dichloroethane/hexane mixture solution for **CV4-R** and **CV8-Y**, dichloroethane/cyclohexane/ether mixture solution for **CV6-R**, and dichloromethane/methanol mixture solution for **CV10-O** and **CV16-R**.

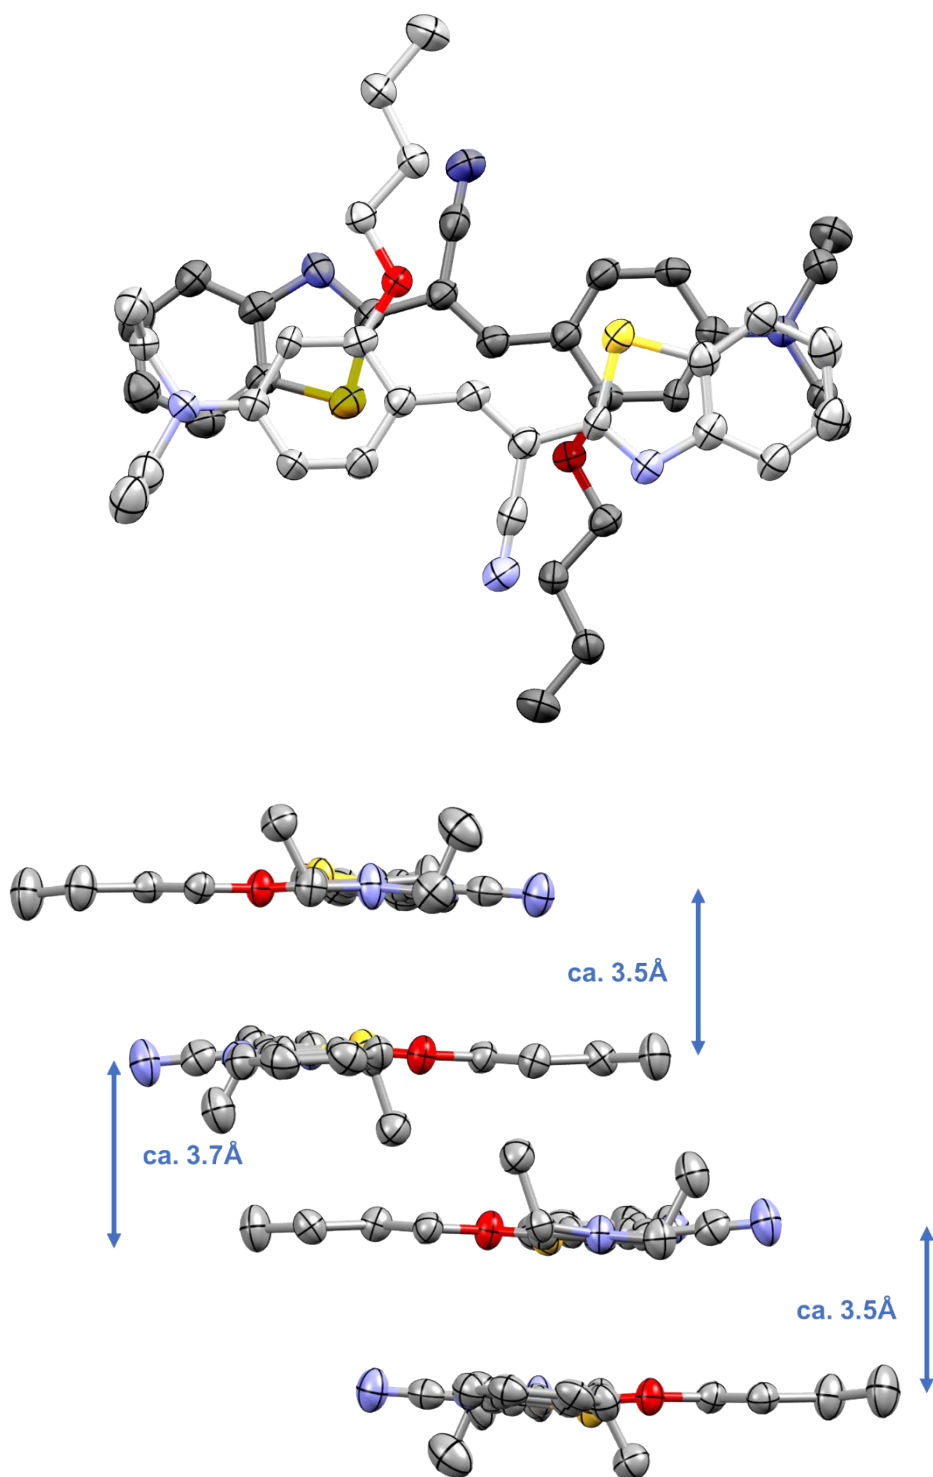

**Figure S36.**  $\pi$ -Stacking observed in the X-ray crystal structure of **CV4-R** (top view: (top); side view (bottom)) drawn with thermal ellipsoids set at 50% probability and with hydrogen atoms omitted for clarity.



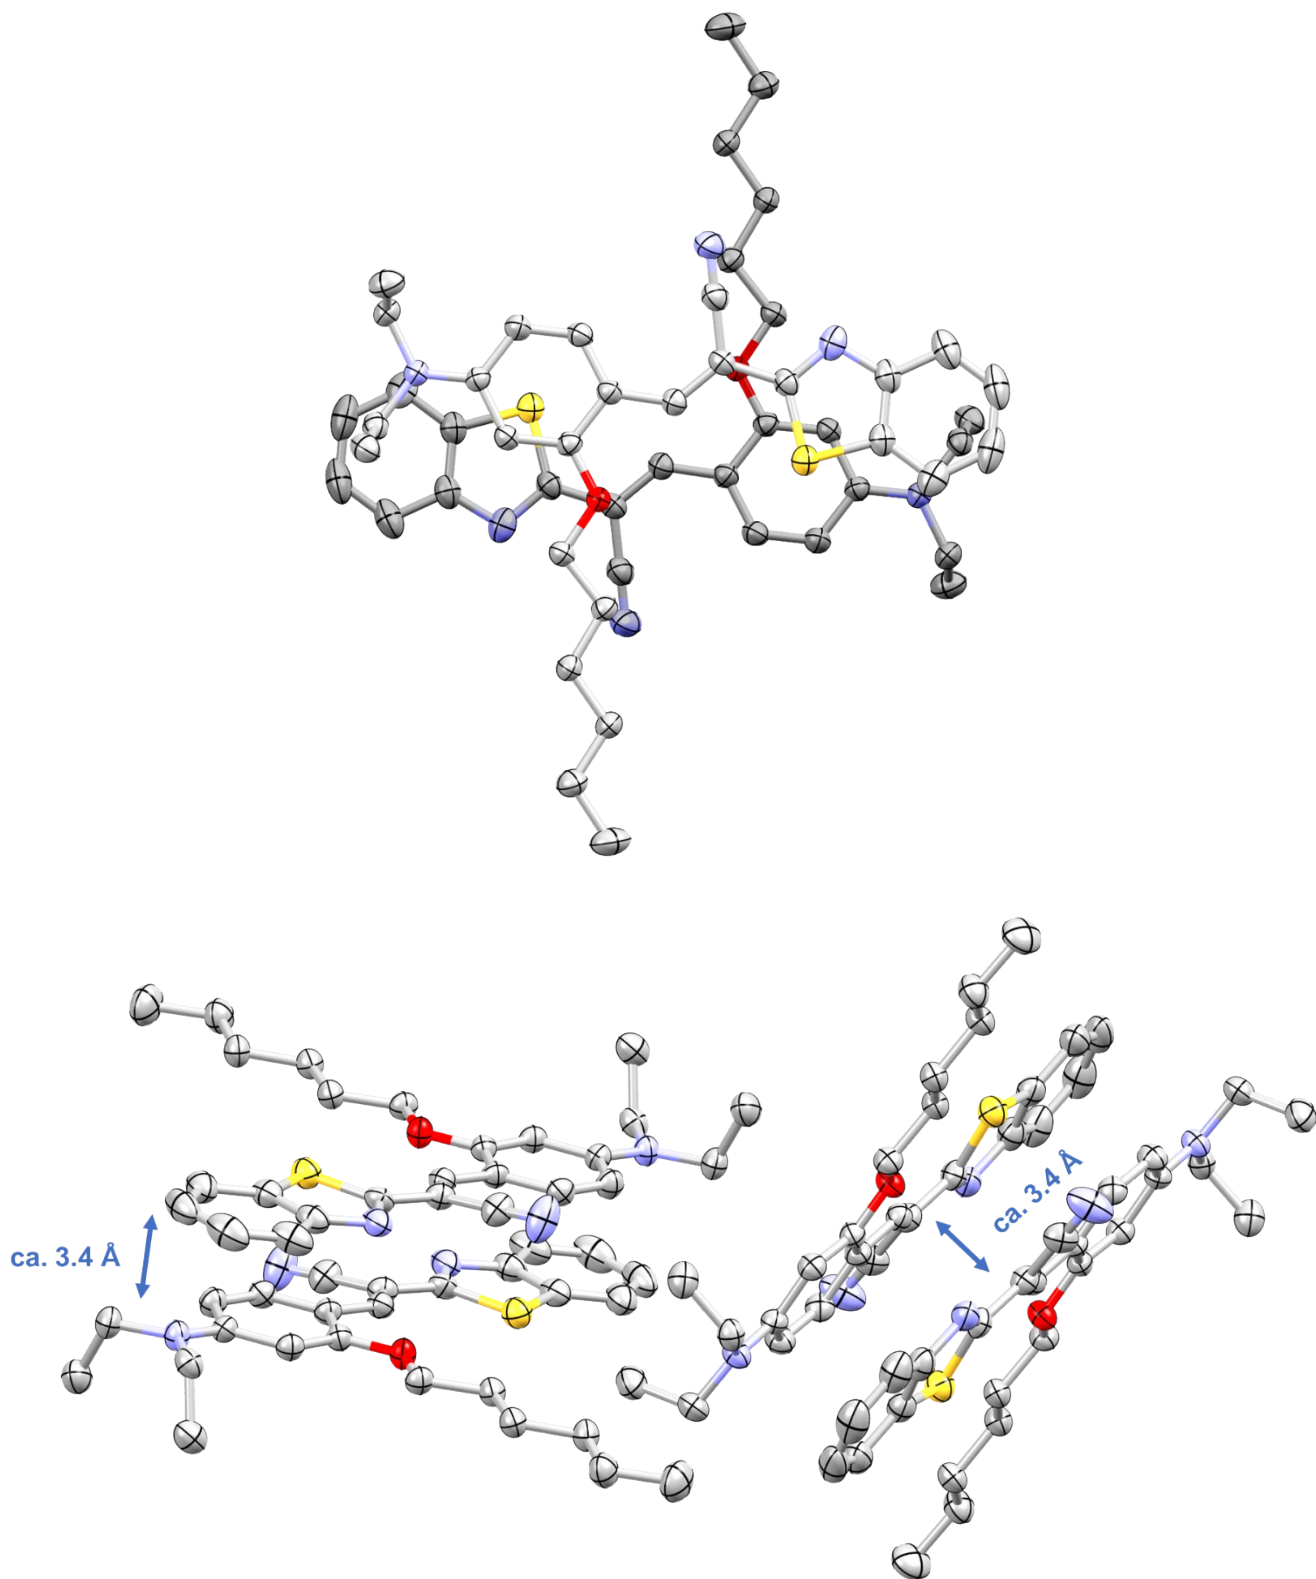

**Figure S37.**  $\pi$ -Stacking observed in the X-ray crystal structure of CV6-R (top view: (top); side view (bottom)) drawn with thermal ellipsoids set at 50% probability and with hydrogen atoms omitted for clarity.

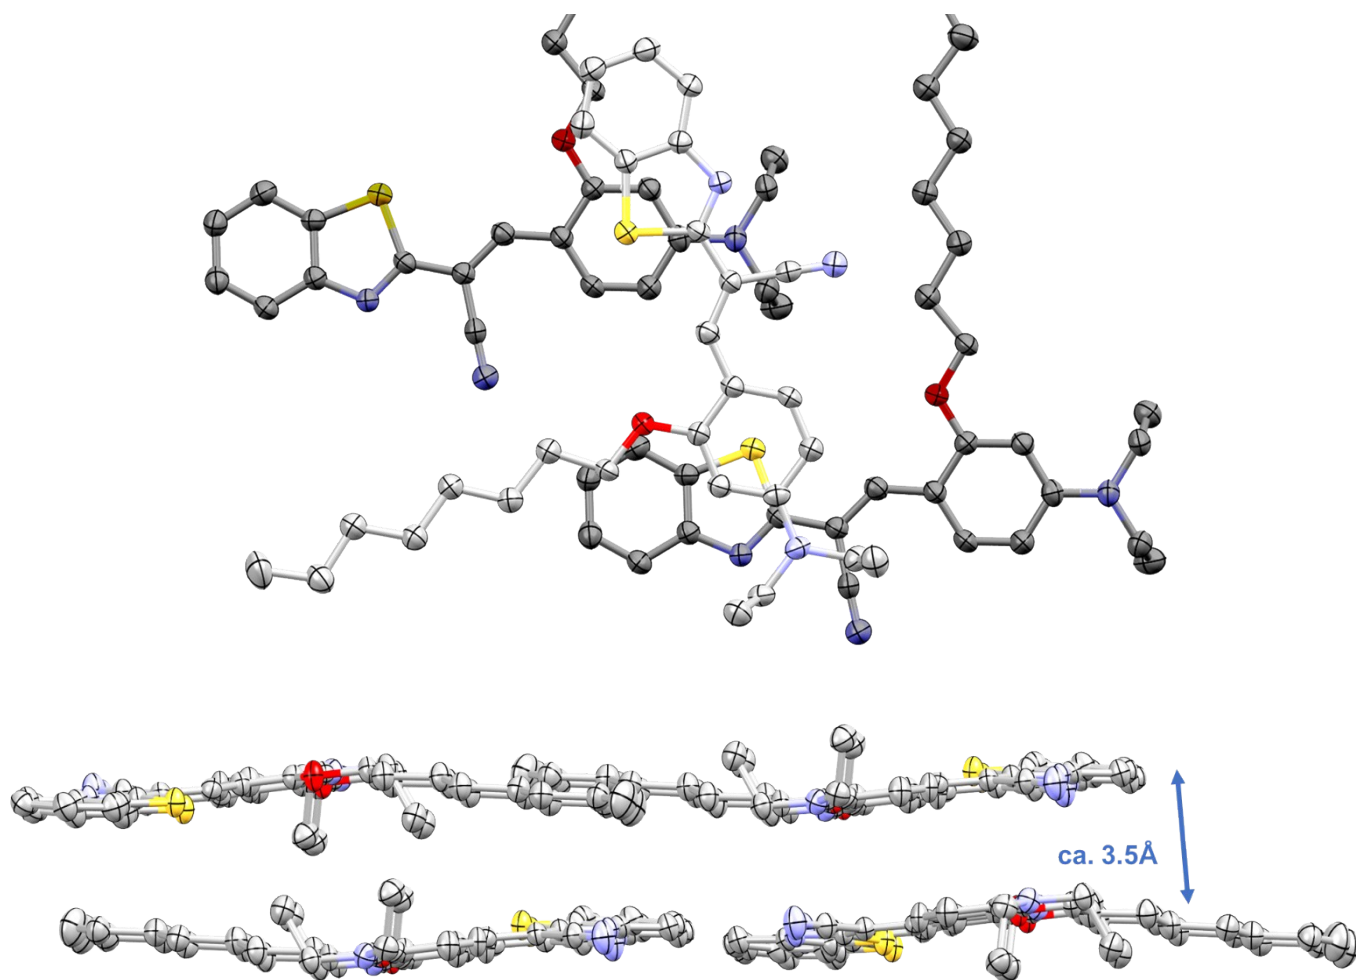

**Figure S38.**  $\pi$ -Stacking observed in the X-ray crystal structure of CV8-Y (top view: (top); side view (bottom)) drawn with thermal ellipsoids set at 50% probability. The alkoxy side chains were truncated and hydrogen atoms were omitted for clarity.

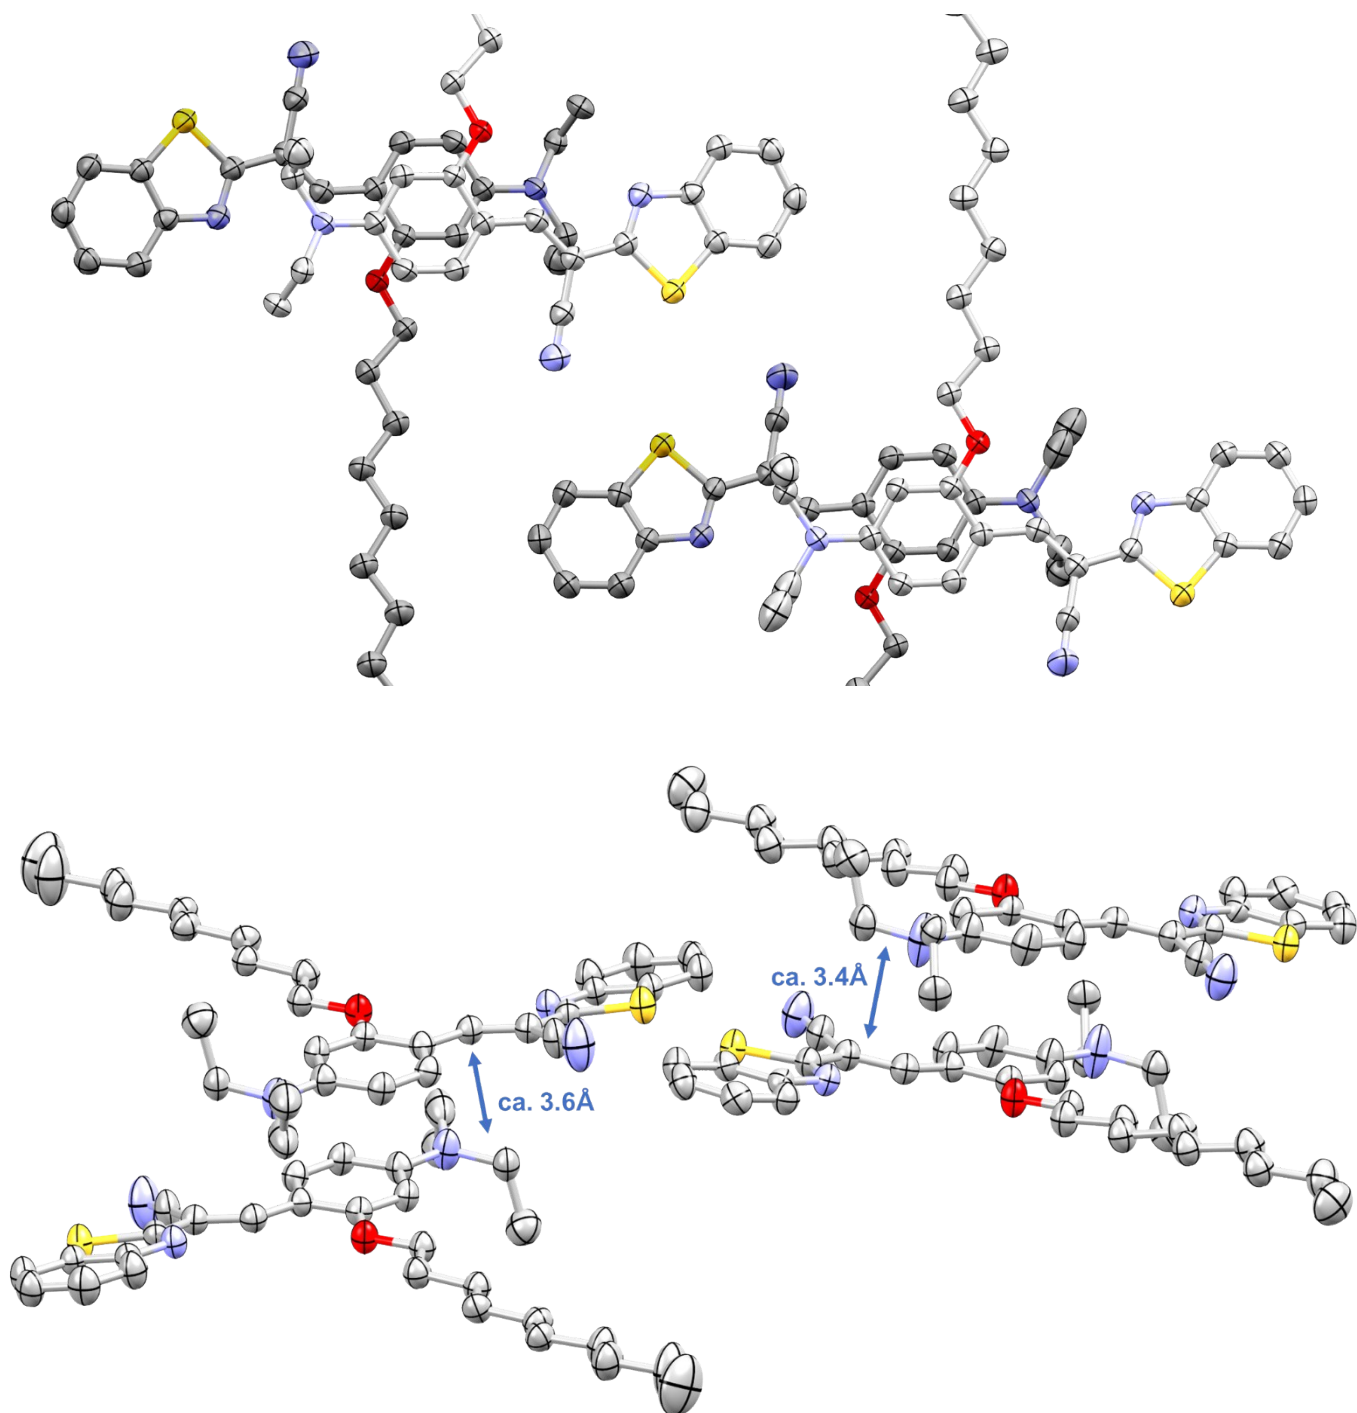

**Figure S39.**  $\pi$ -Stacking observed in the X-ray crystal structure of **CV10-O** (top view: (top); side view (bottom)) drawn with thermal ellipsoids set at 50% probability. The alkoxy side chains were truncated and hydrogen atoms were omitted for clarity.

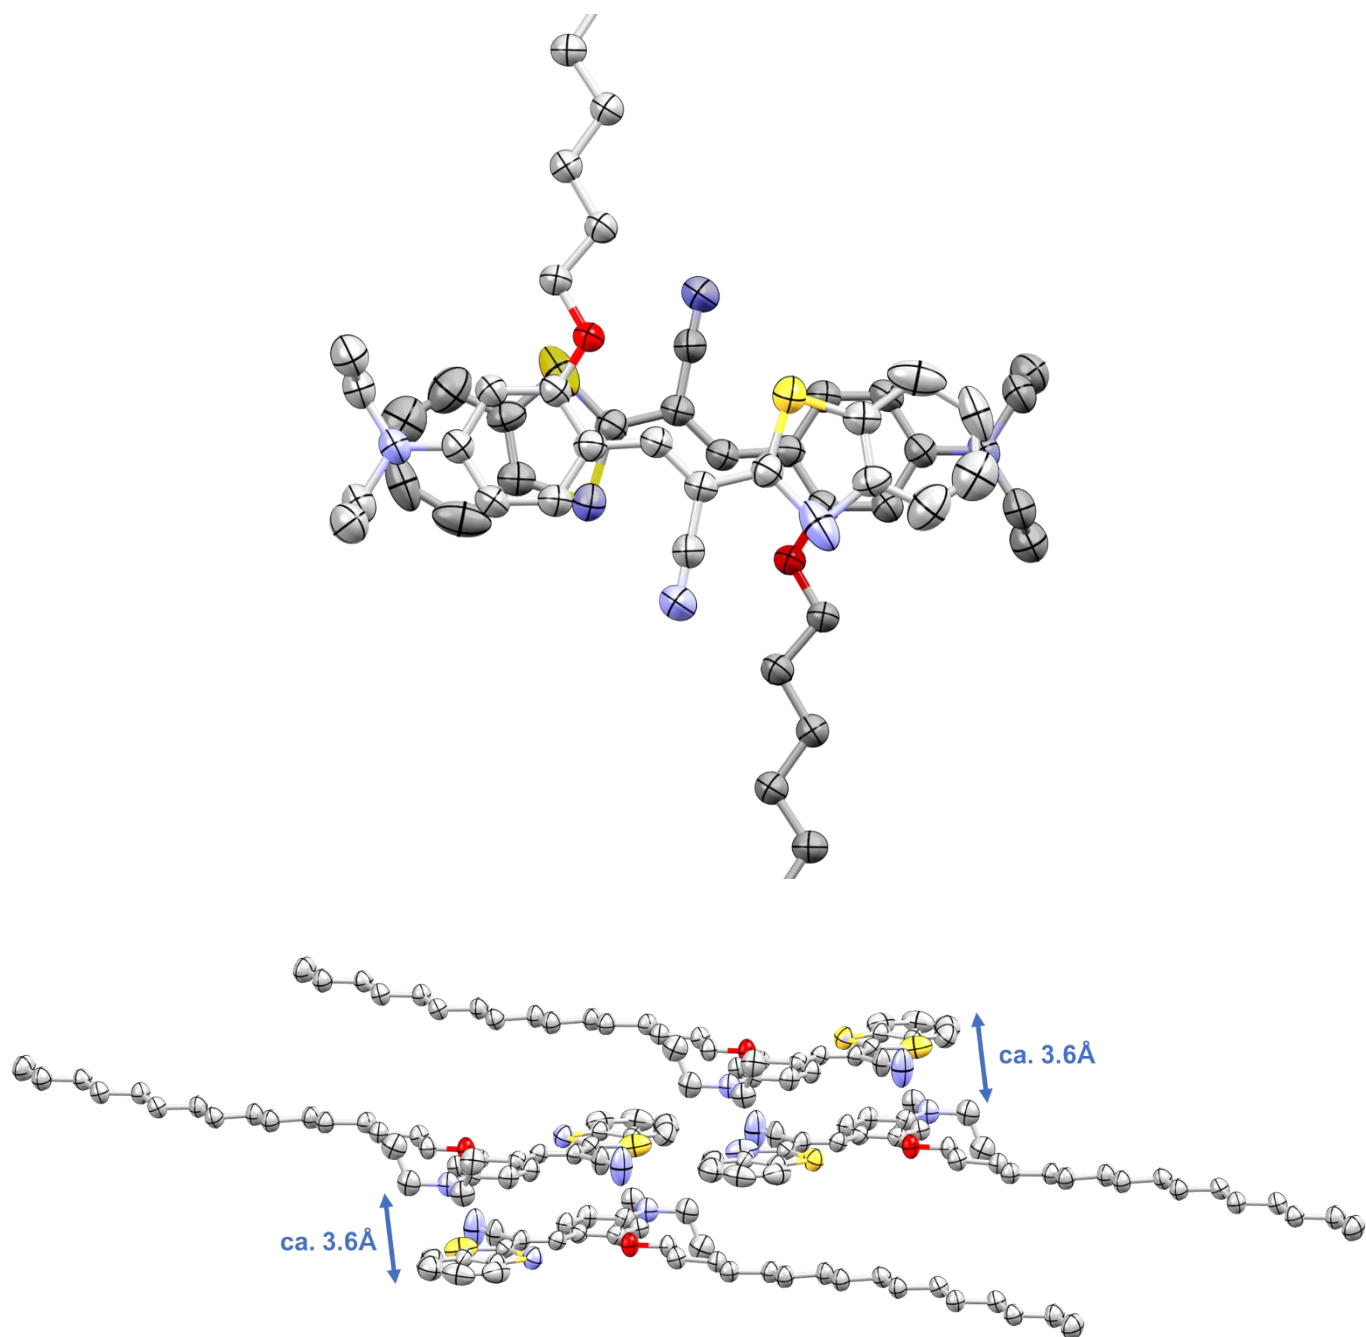

**Figure S40.**  $\pi$ -Stacking observed in the X-ray crystal structure of **CV16-R** (top view: (top); side view (bottom)) drawn with thermal ellipsoids set at 50% probability. The alkoxy side chains were truncated and hydrogen atoms were omitted for clarity.

**Table S6.** Crystal data and structure refinement for **CV4-R**.

|                                   |                                                            |
|-----------------------------------|------------------------------------------------------------|
| Identification code               | <b>CV4-R</b>                                               |
| Empirical formula                 | $C_{96} H_{108} N_{12} O_4 S_4$                            |
| Formula weight                    | 1622.18                                                    |
| Temperature                       | 186(2) K                                                   |
| Wavelength                        | 0.71073 Å                                                  |
| Crystal system                    | Triclinic                                                  |
| Space group                       | P-1                                                        |
| Unit cell dimensions              | a = 11.6543(8) Å<br>b = 15.9640(12) Å<br>c = 25.0748(18) Å |
| Volume                            | 4347.9(5) Å <sup>3</sup>                                   |
| Z                                 | 2                                                          |
| Density (calculated)              | 1.239 Mg/m <sup>3</sup>                                    |
| Absorption coefficient            | 0.169 mm <sup>-1</sup>                                     |
| F(000)                            | 1728                                                       |
| Crystal size                      | 0.24 x 0.12 x 0.10 mm <sup>3</sup>                         |
| Theta range for data collection   | 0.82 to 26.03°.                                            |
| Index ranges                      | -11<=h<=14, -19<=k<=19, -23<=l<=30                         |
| Reflections collected             | 27138                                                      |
| Independent reflections           | 16980 [R(int) = 0.0444]                                    |
| Completeness to theta = 26.03°    | 99.0 %                                                     |
| Absorption correction             | None                                                       |
| Refinement method                 | Full-matrix least-squares on F <sup>2</sup>                |
| Data / restraints / parameters    | 16980 / 0 / 1057                                           |
| Goodness-of-fit on F <sup>2</sup> | 1.033                                                      |
| Final R indices [I>2sigma(I)]     | R1 = 0.0797, wR2 = 0.2099                                  |
| R indices (all data)              | R1 = 0.1585, wR2 = 0.2665                                  |
| Largest diff. peak and hole       | 0.554 and -0.448 e.Å <sup>-3</sup>                         |

**Table S7.** Atomic coordinates ( $\times 10^4$ ) and equivalent isotropic displacement parameters ( $\text{\AA}^2 \times 10^3$ ) for CV4-R.  $U(\text{eq})$  is defined as one third of the trace of the orthogonalized  $U^{ij}$  tensor.

|       | x        | y       | z        | $U(\text{eq})$ |
|-------|----------|---------|----------|----------------|
| C(1)  | 2911(4)  | 1163(3) | 9821(2)  | 41(1)          |
| C(2)  | 2049(4)  | 1085(3) | 9505(2)  | 45(1)          |
| C(3)  | 802(5)   | 1353(3) | 9695(2)  | 49(1)          |
| C(4)  | 473(5)   | 1667(4) | 10233(2) | 51(1)          |
| C(5)  | 1349(5)  | 1700(3) | 10554(2) | 51(1)          |
| C(6)  | 2597(5)  | 1451(3) | 10365(2) | 46(1)          |
| C(7)  | 3548(5)  | 1526(3) | 10666(2) | 43(1)          |
| C(8)  | 3568(5)  | 1661(3) | 11203(2) | 46(1)          |
| N(1)  | 4750(4)  | 1780(3) | 11941(2) | 46(1)          |
| S(1)  | 5840(1)  | 1860(1) | 10994(1) | 64(1)          |
| C(9)  | 4634(5)  | 1750(3) | 11422(2) | 45(1)          |
| C(10) | 5865(5)  | 1876(3) | 12012(2) | 47(1)          |
| C(11) | 6591(5)  | 1924(4) | 11542(2) | 52(1)          |
| C(12) | 7739(5)  | 2000(4) | 11566(2) | 68(2)          |
| C(13) | 8140(5)  | 2035(4) | 12067(2) | 63(2)          |
| C(14) | 7420(5)  | 2001(4) | 12527(2) | 58(2)          |
| C(15) | 6290(5)  | 1920(3) | 12510(2) | 58(1)          |
| O(1)  | 4116(3)  | 957(2)  | 9638(1)  | 49(1)          |
| C(16) | 4469(4)  | 836(3)  | 9072(2)  | 44(1)          |
| C(17) | 5734(4)  | 873(3)  | 8971(2)  | 46(1)          |
| C(18) | 6147(4)  | 810(4)  | 8375(2)  | 54(1)          |
| C(19) | 7402(5)  | 846(5)  | 8247(3)  | 96(2)          |
| N(2)  | -55(4)   | 1313(3) | 9379(2)  | 67(1)          |
| C(20) | -1376(5) | 1587(4) | 9570(2)  | 59(2)          |
| C(21) | -1701(5) | 868(4)  | 9857(2)  | 69(2)          |
| C(22) | 282(7)   | 1172(6) | 8657(5)  | 160(6)         |

|       |          |         |          |        |
|-------|----------|---------|----------|--------|
| C(23) | 570(8)   | 350(8)  | 8769(4)  | 155(5) |
| C(24) | 2577(5)  | 1676(4) | 11593(2) | 56(1)  |
| N(3)  | 1769(5)  | 1682(4) | 11895(2) | 76(2)  |
| C(25) | 6991(4)  | 1084(3) | 5946(2)  | 43(1)  |
| C(26) | 7893(4)  | 1048(3) | 6277(2)  | 41(1)  |
| C(27) | 8988(4)  | 1160(3) | 6068(2)  | 48(1)  |
| C(28) | 9150(5)  | 1263(4) | 5513(2)  | 59(2)  |
| C(29) | 8267(5)  | 1283(4) | 5193(2)  | 53(1)  |
| C(30) | 7131(4)  | 1213(3) | 5386(2)  | 42(1)  |
| C(31) | 6145(4)  | 1256(3) | 5075(2)  | 43(1)  |
| C(32) | 5968(4)  | 1431(3) | 4551(2)  | 42(1)  |
| C(33) | 4861(4)  | 1404(3) | 4323(2)  | 42(1)  |
| N(4)  | 4627(4)  | 1619(3) | 3831(2)  | 44(1)  |
| S(2)  | 3786(1)  | 1086(1) | 4718(1)  | 51(1)  |
| C(34) | 3496(5)  | 1544(3) | 3742(2)  | 45(1)  |
| C(35) | 2893(4)  | 1272(3) | 4188(2)  | 46(1)  |
| C(36) | 1758(5)  | 1195(4) | 4157(2)  | 53(1)  |
| C(37) | 1212(5)  | 1393(4) | 3690(2)  | 56(1)  |
| C(38) | 1812(5)  | 1641(3) | 3250(2)  | 55(1)  |
| C(39) | 2961(5)  | 1720(3) | 3263(2)  | 51(1)  |
| O(2)  | 5900(3)  | 1001(2) | 6134(1)  | 46(1)  |
| C(40) | 5700(4)  | 819(3)  | 6689(2)  | 43(1)  |
| C(41) | 4481(4)  | 698(3)  | 6778(2)  | 45(1)  |
| C(42) | 4190(5)  | 524(4)  | 7366(2)  | 64(2)  |
| C(43) | 2935(5)  | 486(5)  | 7493(3)  | 85(2)  |
| N(5)  | 9851(4)  | 1172(3) | 6402(2)  | 59(1)  |
| C(44) | 10962(5) | 1395(4) | 6194(2)  | 69(2)  |
| C(45) | 11950(6) | 605(5)  | 5975(2)  | 84(2)  |

|       |          |         |         |       |
|-------|----------|---------|---------|-------|
| C(46) | 9706(5)  | 1008(4) | 6971(2) | 50(1) |
| C(47) | 10003(5) | 48(4)   | 7106(2) | 58(1) |
| C(48) | 6825(5)  | 1667(3) | 4181(2) | 48(1) |
| N(6)  | 7518(4)  | 1854(3) | 3896(2) | 64(1) |
| C(49) | 6870(4)  | 6424(3) | 5190(2) | 44(1) |
| C(50) | 7777(4)  | 6367(3) | 5512(2) | 40(1) |
| C(51) | 8846(4)  | 6544(3) | 5315(2) | 45(1) |
| C(52) | 8927(5)  | 6774(4) | 4773(2) | 50(1) |
| C(53) | 8028(5)  | 6820(3) | 4456(2) | 50(1) |
| C(54) | 6958(4)  | 6643(3) | 4638(2) | 44(1) |
| C(55) | 5988(4)  | 6669(3) | 4328(2) | 44(1) |
| C(56) | 5857(4)  | 6756(3) | 3789(2) | 44(1) |
| C(57) | 4752(4)  | 6734(3) | 3567(2) | 41(1) |
| N(7)  | 4601(3)  | 6808(3) | 3038(2) | 47(1) |
| S(3)  | 3559(1)  | 6588(1) | 3988(1) | 54(1) |
| C(58) | 3462(5)  | 6736(3) | 2970(2) | 46(1) |
| C(59) | 2776(5)  | 6614(3) | 3437(2) | 45(1) |
| C(60) | 1622(5)  | 6534(3) | 3416(2) | 54(1) |
| C(61) | 1180(5)  | 6575(4) | 2922(2) | 63(2) |
| C(62) | 1864(6)  | 6700(4) | 2462(2) | 62(2) |
| C(63) | 2999(5)  | 6777(4) | 2477(2) | 55(1) |
| O(3)  | 5839(3)  | 6243(2) | 5362(1) | 50(1) |
| C(64) | 5655(4)  | 6038(3) | 5912(2) | 45(1) |
| C(65) | 4459(4)  | 5875(3) | 5998(2) | 44(1) |
| C(66) | 4163(4)  | 5724(4) | 6585(2) | 48(1) |
| C(67) | 2928(5)  | 5627(4) | 6706(2) | 72(2) |
| N(8)  | 9747(4)  | 6494(3) | 5641(2) | 47(1) |
| C(68) | 10845(5) | 6697(4) | 5442(2) | 57(1) |



|       |          |         |          |       |
|-------|----------|---------|----------|-------|
| C(69) | 11826(5) | 5904(4) | 5159(2)  | 74(2) |
| C(70) | 9672(4)  | 6204(3) | 6190(2)  | 41(1) |
| C(71) | 10067(5) | 5201(4) | 6242(2)  | 60(2) |
| C(72) | 6806(5)  | 6831(4) | 3404(2)  | 53(1) |
| N(9)  | 7565(4)  | 6896(4) | 3104(2)  | 70(1) |
| C(73) | 3244(4)  | 5750(3) | 9052(2)  | 39(1) |
| C(74) | 2440(4)  | 5568(3) | 8740(2)  | 41(1) |
| C(75) | 1314(4)  | 5530(3) | 8971(2)  | 43(1) |
| C(76) | 1035(4)  | 5702(3) | 9526(2)  | 47(1) |
| C(77) | 1828(4)  | 5894(3) | 9831(2)  | 44(1) |
| C(78) | 2968(4)  | 5928(3) | 9611(2)  | 41(1) |
| C(79) | 3856(4)  | 6109(3) | 9908(2)  | 40(1) |
| C(80) | 3871(4)  | 6287(3) | 10441(2) | 40(1) |
| C(81) | 4886(4)  | 6473(3) | 10645(2) | 38(1) |
| N(10) | 4952(4)  | 6604(3) | 11158(2) | 46(1) |
| S(4)  | 6102(1)  | 6542(1) | 10205(1) | 50(1) |
| C(82) | 6044(5)  | 6748(3) | 11226(2) | 45(1) |
| C(83) | 6788(4)  | 6725(3) | 10755(2) | 45(1) |
| C(84) | 7930(5)  | 6835(3) | 10760(2) | 52(1) |
| C(85) | 8288(5)  | 6974(3) | 11258(2) | 57(1) |
| C(86) | 7534(5)  | 6996(3) | 11723(2) | 58(2) |
| C(87) | 6408(5)  | 6891(3) | 11717(2) | 53(1) |
| O(4)  | 4360(3)  | 5761(2) | 8846(1)  | 46(1) |
| C(88) | 4696(4)  | 5636(3) | 8279(2)  | 43(1) |
| C(89) | 5923(4)  | 5752(3) | 8166(2)  | 42(1) |
| C(90) | 6284(4)  | 5768(3) | 7571(2)  | 46(1) |
| C(91) | 7495(5)  | 5909(4) | 7453(2)  | 65(2) |
| N(11) | 538(4)   | 5318(3) | 8662(2)  | 48(1) |

|       |          |         |          |       |
|-------|----------|---------|----------|-------|
| C(92) | -568(4)  | 5183(3) | 8902(2)  | 51(1) |
| C(93) | -1679(5) | 6042(4) | 8992(2)  | 64(2) |
| C(94) | 762(5)   | 5237(4) | 8077(2)  | 53(1) |
| C(95) | 433(5)   | 6121(4) | 7811(2)  | 67(2) |
| C(96) | 2886(5)  | 6305(3) | 10835(2) | 47(1) |
| N(12) | 2082(4)  | 6338(3) | 11148(2) | 63(1) |

---

**Table S8.** Bond lengths [ $\text{\AA}$ ] and angles [ $^\circ$ ] for **CV4-R**.

---

|              |          |
|--------------|----------|
| C(1)-O(1)    | 1.359(5) |
| C(1)-C(2)    | 1.374(6) |
| C(1)-C(6)    | 1.414(6) |
| C(2)-C(3)    | 1.400(6) |
| C(2)-H(2)    | 0.9500   |
| C(3)-N(2)    | 1.350(6) |
| C(3)-C(4)    | 1.412(6) |
| C(4)-C(5)    | 1.372(6) |
| C(4)-H(4)    | 0.9500   |
| C(5)-C(6)    | 1.403(6) |
| C(5)-H(5)    | 0.9500   |
| C(6)-C(7)    | 1.436(6) |
| C(7)-C(8)    | 1.369(6) |
| C(7)-H(7)    | 0.9500   |
| C(8)-C(24)   | 1.437(7) |
| C(8)-C(9)    | 1.456(6) |
| N(1)-C(9)    | 1.323(6) |
| N(1)-C(10)   | 1.389(6) |
| S(1)-C(11)   | 1.720(5) |
| S(1)-C(9)    | 1.746(5) |
| C(10)-C(15)  | 1.397(7) |
| C(10)-C(11)  | 1.403(7) |
| C(11)-C(12)  | 1.391(7) |
| C(12)-C(13)  | 1.389(7) |
| C(12)-H(12)  | 0.9500   |
| C(13)-C(14)  | 1.374(7) |
| C(13)-H(13)  | 0.9500   |
| C(14)-C(15)  | 1.372(7) |
| C(14)-H(14)  | 0.9500   |
| C(15)-H(15)  | 0.9500   |
| O(1)-C(16)   | 1.435(5) |
| C(16)-C(17)  | 1.494(6) |
| C(16)-H(16A) | 0.9900   |
| C(16)-H(16B) | 0.9900   |

|              |           |
|--------------|-----------|
| C(17)-C(18)  | 1.521(6)  |
| C(17)-H(17A) | 0.9900    |
| C(17)-H(17B) | 0.9900    |
| C(18)-C(19)  | 1.489(7)  |
| C(18)-H(18A) | 0.9900    |
| C(18)-H(18B) | 0.9900    |
| C(19)-H(19A) | 0.9800    |
| C(19)-H(19B) | 0.9800    |
| C(19)-H(19C) | 0.9800    |
| N(2)-C(20)   | 1.478(6)  |
| N(2)-C(22)   | 1.814(13) |
| C(20)-C(21)  | 1.492(7)  |
| C(20)-H(20A) | 0.9900    |
| C(20)-H(20B) | 0.9900    |
| C(21)-H(21A) | 0.9800    |
| C(21)-H(21B) | 0.9800    |
| C(21)-H(21C) | 0.9800    |
| C(22)-C(23)  | 1.271(11) |
| C(22)-H(22A) | 0.9900    |
| C(22)-H(22B) | 0.9900    |
| C(23)-H(23A) | 0.9800    |
| C(23)-H(23B) | 0.9800    |
| C(23)-H(23C) | 0.9800    |
| C(24)-N(3)   | 1.149(6)  |
| C(25)-O(2)   | 1.366(5)  |
| C(25)-C(26)  | 1.384(6)  |
| C(25)-C(30)  | 1.421(6)  |
| C(26)-C(27)  | 1.402(6)  |
| C(26)-H(26)  | 0.9500    |
| C(27)-N(5)   | 1.372(6)  |
| C(27)-C(28)  | 1.404(7)  |
| C(28)-C(29)  | 1.356(6)  |
| C(28)-H(28)  | 0.9500    |
| C(29)-C(30)  | 1.409(6)  |
| C(29)-H(29)  | 0.9500    |
| C(30)-C(31)  | 1.430(6)  |

|              |          |
|--------------|----------|
| C(31)-C(32)  | 1.362(6) |
| C(31)-H(31)  | 0.9500   |
| C(32)-C(48)  | 1.445(7) |
| C(32)-C(33)  | 1.473(6) |
| C(33)-N(4)   | 1.306(6) |
| C(33)-S(2)   | 1.739(5) |
| N(4)-C(34)   | 1.402(6) |
| S(2)-C(35)   | 1.725(5) |
| C(34)-C(39)  | 1.387(6) |
| C(34)-C(35)  | 1.413(7) |
| C(35)-C(36)  | 1.380(6) |
| C(36)-C(37)  | 1.367(7) |
| C(36)-H(36)  | 0.9500   |
| C(37)-C(38)  | 1.381(7) |
| C(37)-H(37)  | 0.9500   |
| C(38)-C(39)  | 1.392(7) |
| C(38)-H(38)  | 0.9500   |
| C(39)-H(39)  | 0.9500   |
| O(2)-C(40)   | 1.433(5) |
| C(40)-C(41)  | 1.496(6) |
| C(40)-H(40A) | 0.9900   |
| C(40)-H(40B) | 0.9900   |
| C(41)-C(42)  | 1.527(7) |
| C(41)-H(41A) | 0.9900   |
| C(41)-H(41B) | 0.9900   |
| C(42)-C(43)  | 1.490(7) |
| C(42)-H(42A) | 0.9900   |
| C(42)-H(42B) | 0.9900   |
| C(43)-H(43A) | 0.9800   |
| C(43)-H(43B) | 0.9800   |
| C(43)-H(43C) | 0.9800   |
| N(5)-C(46)   | 1.454(6) |
| N(5)-C(44)   | 1.507(6) |
| C(44)-C(45)  | 1.446(8) |
| C(44)-H(44A) | 0.9900   |
| C(44)-H(44B) | 0.9900   |

|              |          |
|--------------|----------|
| C(45)-H(45A) | 0.9800   |
| C(45)-H(45B) | 0.9800   |
| C(45)-H(45C) | 0.9800   |
| C(46)-C(47)  | 1.492(7) |
| C(46)-H(46A) | 0.9900   |
| C(46)-H(46B) | 0.9900   |
| C(47)-H(47A) | 0.9800   |
| C(47)-H(47B) | 0.9800   |
| C(47)-H(47C) | 0.9800   |
| C(48)-N(6)   | 1.145(6) |
| C(49)-O(3)   | 1.363(5) |
| C(49)-C(50)  | 1.367(6) |
| C(49)-C(54)  | 1.430(6) |
| C(50)-C(51)  | 1.417(6) |
| C(50)-H(50)  | 0.9500   |
| C(51)-N(8)   | 1.370(6) |
| C(51)-C(52)  | 1.410(6) |
| C(52)-C(53)  | 1.355(6) |
| C(52)-H(52)  | 0.9500   |
| C(53)-C(54)  | 1.408(6) |
| C(53)-H(53)  | 0.9500   |
| C(54)-C(55)  | 1.420(6) |
| C(55)-C(56)  | 1.374(6) |
| C(55)-H(55)  | 0.9500   |
| C(56)-C(72)  | 1.436(7) |
| C(56)-C(57)  | 1.462(6) |
| C(57)-N(7)   | 1.353(6) |
| C(57)-S(3)   | 1.747(5) |
| N(7)-C(58)   | 1.399(6) |
| S(3)-C(59)   | 1.719(5) |
| C(58)-C(63)  | 1.385(7) |
| C(58)-C(59)  | 1.407(6) |
| C(59)-C(60)  | 1.399(6) |
| C(60)-C(61)  | 1.378(7) |
| C(60)-H(60)  | 0.9500   |
| C(61)-C(62)  | 1.394(7) |

|              |          |
|--------------|----------|
| C(61)-H(61)  | 0.9500   |
| C(62)-C(63)  | 1.376(7) |
| C(62)-H(62)  | 0.9500   |
| C(63)-H(63)  | 0.9500   |
| O(3)-C(64)   | 1.431(5) |
| C(64)-C(65)  | 1.501(6) |
| C(64)-H(64A) | 0.9900   |
| C(64)-H(64B) | 0.9900   |
| C(65)-C(66)  | 1.518(6) |
| C(65)-H(65A) | 0.9900   |
| C(65)-H(65B) | 0.9900   |
| C(66)-C(67)  | 1.504(6) |
| C(66)-H(66A) | 0.9900   |
| C(66)-H(66B) | 0.9900   |
| C(67)-H(67A) | 0.9800   |
| C(67)-H(67B) | 0.9800   |
| C(67)-H(67C) | 0.9800   |
| N(8)-C(70)   | 1.453(6) |
| N(8)-C(68)   | 1.471(6) |
| C(68)-C(69)  | 1.502(7) |
| C(68)-H(68A) | 0.9900   |
| C(68)-H(68B) | 0.9900   |
| C(69)-H(69A) | 0.9800   |
| C(69)-H(69B) | 0.9800   |
| C(69)-H(69C) | 0.9800   |
| C(70)-C(71)  | 1.512(7) |
| C(70)-H(70A) | 0.9900   |
| C(70)-H(70B) | 0.9900   |
| C(71)-H(71A) | 0.9800   |
| C(71)-H(71B) | 0.9800   |
| C(71)-H(71C) | 0.9800   |
| C(72)-N(9)   | 1.140(6) |
| C(73)-O(4)   | 1.360(5) |
| C(73)-C(74)  | 1.381(6) |
| C(73)-C(78)  | 1.417(6) |
| C(74)-C(75)  | 1.405(6) |

|              |          |
|--------------|----------|
| C(74)-H(74)  | 0.9500   |
| C(75)-N(11)  | 1.372(5) |
| C(75)-C(76)  | 1.406(6) |
| C(76)-C(77)  | 1.365(6) |
| C(76)-H(76)  | 0.9500   |
| C(77)-C(78)  | 1.409(6) |
| C(77)-H(77)  | 0.9500   |
| C(78)-C(79)  | 1.437(6) |
| C(79)-C(80)  | 1.371(6) |
| C(79)-H(79)  | 0.9500   |
| C(80)-C(96)  | 1.434(6) |
| C(80)-C(81)  | 1.452(6) |
| C(81)-N(10)  | 1.318(5) |
| C(81)-S(4)   | 1.748(4) |
| N(10)-C(82)  | 1.395(6) |
| S(4)-C(83)   | 1.731(5) |
| C(82)-C(87)  | 1.385(6) |
| C(82)-C(83)  | 1.391(6) |
| C(83)-C(84)  | 1.404(6) |
| C(84)-C(85)  | 1.393(7) |
| C(84)-H(84)  | 0.9500   |
| C(85)-C(86)  | 1.386(7) |
| C(85)-H(85)  | 0.9500   |
| C(86)-C(87)  | 1.382(7) |
| C(86)-H(86)  | 0.9500   |
| C(87)-H(87)  | 0.9500   |
| O(4)-C(88)   | 1.435(5) |
| C(88)-C(89)  | 1.506(6) |
| C(88)-H(88A) | 0.9900   |
| C(88)-H(88B) | 0.9900   |
| C(89)-C(90)  | 1.513(6) |
| C(89)-H(89A) | 0.9900   |
| C(89)-H(89B) | 0.9900   |
| C(90)-C(91)  | 1.508(6) |
| C(90)-H(90A) | 0.9900   |
| C(90)-H(90B) | 0.9900   |



|                |          |
|----------------|----------|
| C(91)-H(91A)   | 0.9800   |
| C(91)-H(91B)   | 0.9800   |
| C(91)-H(91C)   | 0.9800   |
| N(11)-C(92)    | 1.455(5) |
| N(11)-C(94)    | 1.463(6) |
| C(92)-C(93)    | 1.521(7) |
| C(92)-H(92A)   | 0.9900   |
| C(92)-H(92B)   | 0.9900   |
| C(93)-H(93A)   | 0.9800   |
| C(93)-H(93B)   | 0.9800   |
| C(93)-H(93C)   | 0.9800   |
| C(94)-C(95)    | 1.497(7) |
| C(94)-H(94A)   | 0.9900   |
| C(94)-H(94B)   | 0.9900   |
| C(95)-H(95A)   | 0.9800   |
| C(95)-H(95B)   | 0.9800   |
| C(95)-H(95C)   | 0.9800   |
| C(96)-N(12)    | 1.151(6) |
|                |          |
| O(1)-C(1)-C(2) | 122.7(4) |
| O(1)-C(1)-C(6) | 115.6(4) |
| C(2)-C(1)-C(6) | 121.7(4) |
| C(1)-C(2)-C(3) | 121.4(4) |
| C(1)-C(2)-H(2) | 119.3    |
| C(3)-C(2)-H(2) | 119.3    |
| N(2)-C(3)-C(2) | 121.7(4) |
| N(2)-C(3)-C(4) | 121.0(5) |
| C(2)-C(3)-C(4) | 117.3(4) |
| C(5)-C(4)-C(3) | 120.9(5) |
| C(5)-C(4)-H(4) | 119.6    |
| C(3)-C(4)-H(4) | 119.6    |
| C(4)-C(5)-C(6) | 122.3(5) |
| C(4)-C(5)-H(5) | 118.8    |
| C(6)-C(5)-H(5) | 118.8    |
| C(5)-C(6)-C(1) | 116.3(4) |
| C(5)-C(6)-C(7) | 125.4(4) |

|                    |          |
|--------------------|----------|
| C(1)-C(6)-C(7)     | 118.2(4) |
| C(8)-C(7)-C(6)     | 131.2(5) |
| C(8)-C(7)-H(7)     | 114.4    |
| C(6)-C(7)-H(7)     | 114.4    |
| C(7)-C(8)-C(24)    | 122.9(5) |
| C(7)-C(8)-C(9)     | 121.9(5) |
| C(24)-C(8)-C(9)    | 115.1(4) |
| C(9)-N(1)-C(10)    | 109.2(4) |
| C(11)-S(1)-C(9)    | 89.4(2)  |
| N(1)-C(9)-C(8)     | 123.9(4) |
| N(1)-C(9)-S(1)     | 115.9(4) |
| C(8)-C(9)-S(1)     | 120.1(4) |
| N(1)-C(10)-C(15)   | 124.5(5) |
| N(1)-C(10)-C(11)   | 115.9(4) |
| C(15)-C(10)-C(11)  | 119.6(5) |
| C(12)-C(11)-C(10)  | 120.8(5) |
| C(12)-C(11)-S(1)   | 129.6(4) |
| C(10)-C(11)-S(1)   | 109.5(4) |
| C(13)-C(12)-C(11)  | 118.2(5) |
| C(13)-C(12)-H(12)  | 120.9    |
| C(11)-C(12)-H(12)  | 120.9    |
| C(14)-C(13)-C(12)  | 120.9(5) |
| C(14)-C(13)-H(13)  | 119.5    |
| C(12)-C(13)-H(13)  | 119.5    |
| C(15)-C(14)-C(13)  | 121.6(5) |
| C(15)-C(14)-H(14)  | 119.2    |
| C(13)-C(14)-H(14)  | 119.2    |
| C(14)-C(15)-C(10)  | 118.9(5) |
| C(14)-C(15)-H(15)  | 120.6    |
| C(10)-C(15)-H(15)  | 120.6    |
| C(1)-O(1)-C(16)    | 119.1(3) |
| O(1)-C(16)-C(17)   | 107.9(4) |
| O(1)-C(16)-H(16A)  | 110.1    |
| C(17)-C(16)-H(16A) | 110.1    |
| O(1)-C(16)-H(16B)  | 110.1    |
| C(17)-C(16)-H(16B) | 110.1    |

|                     |          |
|---------------------|----------|
| H(16A)-C(16)-H(16B) | 108.4    |
| C(16)-C(17)-C(18)   | 111.2(4) |
| C(16)-C(17)-H(17A)  | 109.4    |
| C(18)-C(17)-H(17A)  | 109.4    |
| C(16)-C(17)-H(17B)  | 109.4    |
| C(18)-C(17)-H(17B)  | 109.4    |
| H(17A)-C(17)-H(17B) | 108.0    |
| C(19)-C(18)-C(17)   | 113.8(4) |
| C(19)-C(18)-H(18A)  | 108.8    |
| C(17)-C(18)-H(18A)  | 108.8    |
| C(19)-C(18)-H(18B)  | 108.8    |
| C(17)-C(18)-H(18B)  | 108.8    |
| H(18A)-C(18)-H(18B) | 107.7    |
| C(18)-C(19)-H(19A)  | 109.5    |
| C(18)-C(19)-H(19B)  | 109.5    |
| H(19A)-C(19)-H(19B) | 109.5    |
| C(18)-C(19)-H(19C)  | 109.5    |
| H(19A)-C(19)-H(19C) | 109.5    |
| H(19B)-C(19)-H(19C) | 109.5    |
| C(3)-N(2)-C(20)     | 122.8(4) |
| C(3)-N(2)-C(22)     | 121.1(4) |
| C(20)-N(2)-C(22)    | 114.6(4) |
| N(2)-C(20)-C(21)    | 113.1(5) |
| N(2)-C(20)-H(20A)   | 109.0    |
| C(21)-C(20)-H(20A)  | 109.0    |
| N(2)-C(20)-H(20B)   | 109.0    |
| C(21)-C(20)-H(20B)  | 109.0    |
| H(20A)-C(20)-H(20B) | 107.8    |
| C(20)-C(21)-H(21A)  | 109.5    |
| C(20)-C(21)-H(21B)  | 109.5    |
| H(21A)-C(21)-H(21B) | 109.5    |
| C(20)-C(21)-H(21C)  | 109.5    |
| H(21A)-C(21)-H(21C) | 109.5    |
| H(21B)-C(21)-H(21C) | 109.5    |
| C(23)-C(22)-N(2)    | 81.9(10) |
| C(23)-C(22)-H(22A)  | 115.0    |

|                     |          |
|---------------------|----------|
| N(2)-C(22)-H(22A)   | 115.0    |
| C(23)-C(22)-H(22B)  | 115.0    |
| N(2)-C(22)-H(22B)   | 115.0    |
| H(22A)-C(22)-H(22B) | 112.0    |
| C(22)-C(23)-H(23A)  | 109.5    |
| C(22)-C(23)-H(23B)  | 109.5    |
| H(23A)-C(23)-H(23B) | 109.5    |
| C(22)-C(23)-H(23C)  | 109.5    |
| H(23A)-C(23)-H(23C) | 109.5    |
| H(23B)-C(23)-H(23C) | 109.5    |
| N(3)-C(24)-C(8)     | 178.2(6) |
| O(2)-C(25)-C(26)    | 122.5(4) |
| O(2)-C(25)-C(30)    | 115.0(4) |
| C(26)-C(25)-C(30)   | 122.5(4) |
| C(25)-C(26)-C(27)   | 120.6(4) |
| C(25)-C(26)-H(26)   | 119.7    |
| C(27)-C(26)-H(26)   | 119.7    |
| N(5)-C(27)-C(26)    | 120.4(4) |
| N(5)-C(27)-C(28)    | 122.2(4) |
| C(26)-C(27)-C(28)   | 117.4(4) |
| C(29)-C(28)-C(27)   | 121.3(5) |
| C(29)-C(28)-H(28)   | 119.3    |
| C(27)-C(28)-H(28)   | 119.3    |
| C(28)-C(29)-C(30)   | 123.3(5) |
| C(28)-C(29)-H(29)   | 118.3    |
| C(30)-C(29)-H(29)   | 118.3    |
| C(29)-C(30)-C(25)   | 114.8(4) |
| C(29)-C(30)-C(31)   | 126.3(4) |
| C(25)-C(30)-C(31)   | 118.9(4) |
| C(32)-C(31)-C(30)   | 132.6(5) |
| C(32)-C(31)-H(31)   | 113.7    |
| C(30)-C(31)-H(31)   | 113.7    |
| C(31)-C(32)-C(48)   | 123.3(4) |
| C(31)-C(32)-C(33)   | 121.6(4) |
| C(48)-C(32)-C(33)   | 115.1(4) |
| N(4)-C(33)-C(32)    | 123.2(4) |

|                     |          |
|---------------------|----------|
| N(4)-C(33)-S(2)     | 117.1(4) |
| C(32)-C(33)-S(2)    | 119.7(3) |
| C(33)-N(4)-C(34)    | 109.3(4) |
| C(35)-S(2)-C(33)    | 89.1(2)  |
| C(39)-C(34)-N(4)    | 124.9(5) |
| C(39)-C(34)-C(35)   | 120.1(5) |
| N(4)-C(34)-C(35)    | 115.0(4) |
| C(36)-C(35)-C(34)   | 120.7(5) |
| C(36)-C(35)-S(2)    | 129.7(4) |
| C(34)-C(35)-S(2)    | 109.6(3) |
| C(37)-C(36)-C(35)   | 119.3(5) |
| C(37)-C(36)-H(36)   | 120.3    |
| C(35)-C(36)-H(36)   | 120.3    |
| C(36)-C(37)-C(38)   | 120.0(5) |
| C(36)-C(37)-H(37)   | 120.0    |
| C(38)-C(37)-H(37)   | 120.0    |
| C(37)-C(38)-C(39)   | 122.5(5) |
| C(37)-C(38)-H(38)   | 118.8    |
| C(39)-C(38)-H(38)   | 118.8    |
| C(34)-C(39)-C(38)   | 117.3(5) |
| C(34)-C(39)-H(39)   | 121.3    |
| C(38)-C(39)-H(39)   | 121.3    |
| C(25)-O(2)-C(40)    | 119.2(3) |
| O(2)-C(40)-C(41)    | 108.1(4) |
| O(2)-C(40)-H(40A)   | 110.1    |
| C(41)-C(40)-H(40A)  | 110.1    |
| O(2)-C(40)-H(40B)   | 110.1    |
| C(41)-C(40)-H(40B)  | 110.1    |
| H(40A)-C(40)-H(40B) | 108.4    |
| C(40)-C(41)-C(42)   | 111.1(4) |
| C(40)-C(41)-H(41A)  | 109.4    |
| C(42)-C(41)-H(41A)  | 109.4    |
| C(40)-C(41)-H(41B)  | 109.4    |
| C(42)-C(41)-H(41B)  | 109.4    |
| H(41A)-C(41)-H(41B) | 108.0    |
| C(43)-C(42)-C(41)   | 113.9(5) |

|                     |          |
|---------------------|----------|
| C(43)-C(42)-H(42A)  | 108.8    |
| C(41)-C(42)-H(42A)  | 108.8    |
| C(43)-C(42)-H(42B)  | 108.8    |
| C(41)-C(42)-H(42B)  | 108.8    |
| H(42A)-C(42)-H(42B) | 107.7    |
| C(42)-C(43)-H(43A)  | 109.5    |
| C(42)-C(43)-H(43B)  | 109.5    |
| H(43A)-C(43)-H(43B) | 109.5    |
| C(42)-C(43)-H(43C)  | 109.5    |
| H(43A)-C(43)-H(43C) | 109.5    |
| H(43B)-C(43)-H(43C) | 109.5    |
| C(27)-N(5)-C(46)    | 121.5(4) |
| C(27)-N(5)-C(44)    | 120.9(4) |
| C(46)-N(5)-C(44)    | 117.5(4) |
| C(45)-C(44)-N(5)    | 110.9(5) |
| C(45)-C(44)-H(44A)  | 109.5    |
| N(5)-C(44)-H(44A)   | 109.5    |
| C(45)-C(44)-H(44B)  | 109.5    |
| N(5)-C(44)-H(44B)   | 109.5    |
| H(44A)-C(44)-H(44B) | 108.1    |
| C(44)-C(45)-H(45A)  | 109.5    |
| C(44)-C(45)-H(45B)  | 109.5    |
| H(45A)-C(45)-H(45B) | 109.5    |
| C(44)-C(45)-H(45C)  | 109.5    |
| H(45A)-C(45)-H(45C) | 109.5    |
| H(45B)-C(45)-H(45C) | 109.5    |
| N(5)-C(46)-C(47)    | 114.9(4) |
| N(5)-C(46)-H(46A)   | 108.5    |
| C(47)-C(46)-H(46A)  | 108.5    |
| N(5)-C(46)-H(46B)   | 108.5    |
| C(47)-C(46)-H(46B)  | 108.5    |
| H(46A)-C(46)-H(46B) | 107.5    |
| C(46)-C(47)-H(47A)  | 109.5    |
| C(46)-C(47)-H(47B)  | 109.5    |
| H(47A)-C(47)-H(47B) | 109.5    |
| C(46)-C(47)-H(47C)  | 109.5    |

|                     |          |
|---------------------|----------|
| H(47A)-C(47)-H(47C) | 109.5    |
| H(47B)-C(47)-H(47C) | 109.5    |
| N(6)-C(48)-C(32)    | 178.7(5) |
| O(3)-C(49)-C(50)    | 123.0(4) |
| O(3)-C(49)-C(54)    | 114.8(4) |
| C(50)-C(49)-C(54)   | 122.2(4) |
| C(49)-C(50)-C(51)   | 121.3(4) |
| C(49)-C(50)-H(50)   | 119.4    |
| C(51)-C(50)-H(50)   | 119.4    |
| N(8)-C(51)-C(52)    | 122.3(4) |
| N(8)-C(51)-C(50)    | 121.0(4) |
| C(52)-C(51)-C(50)   | 116.7(5) |
| C(53)-C(52)-C(51)   | 121.6(4) |
| C(53)-C(52)-H(52)   | 119.2    |
| C(51)-C(52)-H(52)   | 119.2    |
| C(52)-C(53)-C(54)   | 123.1(5) |
| C(52)-C(53)-H(53)   | 118.4    |
| C(54)-C(53)-H(53)   | 118.4    |
| C(53)-C(54)-C(55)   | 126.2(4) |
| C(53)-C(54)-C(49)   | 115.1(4) |
| C(55)-C(54)-C(49)   | 118.7(4) |
| C(56)-C(55)-C(54)   | 132.7(5) |
| C(56)-C(55)-H(55)   | 113.6    |
| C(54)-C(55)-H(55)   | 113.6    |
| C(55)-C(56)-C(72)   | 122.9(4) |
| C(55)-C(56)-C(57)   | 121.6(4) |
| C(72)-C(56)-C(57)   | 115.4(4) |
| N(7)-C(57)-C(56)    | 123.0(4) |
| N(7)-C(57)-S(3)     | 116.9(3) |
| C(56)-C(57)-S(3)    | 120.0(3) |
| C(57)-N(7)-C(58)    | 107.4(4) |
| C(59)-S(3)-C(57)    | 89.0(2)  |
| C(63)-C(58)-N(7)    | 123.7(5) |
| C(63)-C(58)-C(59)   | 120.0(5) |
| N(7)-C(58)-C(59)    | 116.3(4) |
| C(60)-C(59)-C(58)   | 121.3(5) |

|                     |          |
|---------------------|----------|
| C(60)-C(59)-S(3)    | 128.4(4) |
| C(58)-C(59)-S(3)    | 110.3(4) |
| C(61)-C(60)-C(59)   | 117.8(5) |
| C(61)-C(60)-H(60)   | 121.1    |
| C(59)-C(60)-H(60)   | 121.1    |
| C(60)-C(61)-C(62)   | 120.5(5) |
| C(60)-C(61)-H(61)   | 119.7    |
| C(62)-C(61)-H(61)   | 119.7    |
| C(63)-C(62)-C(61)   | 122.1(5) |
| C(63)-C(62)-H(62)   | 118.9    |
| C(61)-C(62)-H(62)   | 118.9    |
| C(62)-C(63)-C(58)   | 118.2(5) |
| C(62)-C(63)-H(63)   | 120.9    |
| C(58)-C(63)-H(63)   | 120.9    |
| C(49)-O(3)-C(64)    | 118.9(4) |
| O(3)-C(64)-C(65)    | 108.4(4) |
| O(3)-C(64)-H(64A)   | 110.0    |
| C(65)-C(64)-H(64A)  | 110.0    |
| O(3)-C(64)-H(64B)   | 110.0    |
| C(65)-C(64)-H(64B)  | 110.0    |
| H(64A)-C(64)-H(64B) | 108.4    |
| C(64)-C(65)-C(66)   | 110.8(4) |
| C(64)-C(65)-H(65A)  | 109.5    |
| C(66)-C(65)-H(65A)  | 109.5    |
| C(64)-C(65)-H(65B)  | 109.5    |
| C(66)-C(65)-H(65B)  | 109.5    |
| H(65A)-C(65)-H(65B) | 108.1    |
| C(67)-C(66)-C(65)   | 113.6(4) |
| C(67)-C(66)-H(66A)  | 108.9    |
| C(65)-C(66)-H(66A)  | 108.9    |
| C(67)-C(66)-H(66B)  | 108.9    |
| C(65)-C(66)-H(66B)  | 108.9    |
| H(66A)-C(66)-H(66B) | 107.7    |
| C(66)-C(67)-H(67A)  | 109.5    |
| C(66)-C(67)-H(67B)  | 109.5    |
| H(67A)-C(67)-H(67B) | 109.5    |



|                     |          |
|---------------------|----------|
| C(66)-C(67)-H(67C)  | 109.5    |
| H(67A)-C(67)-H(67C) | 109.5    |
| H(67B)-C(67)-H(67C) | 109.5    |
| C(51)-N(8)-C(70)    | 121.0(4) |
| C(51)-N(8)-C(68)    | 121.2(4) |
| C(70)-N(8)-C(68)    | 117.7(4) |
| N(8)-C(68)-C(69)    | 112.1(4) |
| N(8)-C(68)-H(68A)   | 109.2    |
| C(69)-C(68)-H(68A)  | 109.2    |
| N(8)-C(68)-H(68B)   | 109.2    |
| C(69)-C(68)-H(68B)  | 109.2    |
| H(68A)-C(68)-H(68B) | 107.9    |
| C(68)-C(69)-H(69A)  | 109.5    |
| C(68)-C(69)-H(69B)  | 109.5    |
| H(69A)-C(69)-H(69B) | 109.5    |
| C(68)-C(69)-H(69C)  | 109.5    |
| H(69A)-C(69)-H(69C) | 109.5    |
| H(69B)-C(69)-H(69C) | 109.5    |
| N(8)-C(70)-C(71)    | 114.2(4) |
| N(8)-C(70)-H(70A)   | 108.7    |
| C(71)-C(70)-H(70A)  | 108.7    |
| N(8)-C(70)-H(70B)   | 108.7    |
| C(71)-C(70)-H(70B)  | 108.7    |
| H(70A)-C(70)-H(70B) | 107.6    |
| C(70)-C(71)-H(71A)  | 109.5    |
| C(70)-C(71)-H(71B)  | 109.5    |
| H(71A)-C(71)-H(71B) | 109.5    |
| C(70)-C(71)-H(71C)  | 109.5    |
| H(71A)-C(71)-H(71C) | 109.5    |
| H(71B)-C(71)-H(71C) | 109.5    |
| N(9)-C(72)-C(56)    | 179.0(6) |
| O(4)-C(73)-C(74)    | 122.5(4) |
| O(4)-C(73)-C(78)    | 115.3(4) |
| C(74)-C(73)-C(78)   | 122.2(4) |
| C(73)-C(74)-C(75)   | 120.7(4) |
| C(73)-C(74)-H(74)   | 119.7    |

|                   |          |
|-------------------|----------|
| C(75)-C(74)-H(74) | 119.7    |
| N(11)-C(75)-C(74) | 120.4(4) |
| N(11)-C(75)-C(76) | 122.1(4) |
| C(74)-C(75)-C(76) | 117.5(4) |
| C(77)-C(76)-C(75) | 121.5(4) |
| C(77)-C(76)-H(76) | 119.3    |
| C(75)-C(76)-H(76) | 119.3    |
| C(76)-C(77)-C(78) | 122.4(4) |
| C(76)-C(77)-H(77) | 118.8    |
| C(78)-C(77)-H(77) | 118.8    |
| C(77)-C(78)-C(73) | 115.8(4) |
| C(77)-C(78)-C(79) | 125.4(4) |
| C(73)-C(78)-C(79) | 118.8(4) |
| C(80)-C(79)-C(78) | 132.6(4) |
| C(80)-C(79)-H(79) | 113.7    |
| C(78)-C(79)-H(79) | 113.7    |
| C(79)-C(80)-C(96) | 122.4(4) |
| C(79)-C(80)-C(81) | 122.1(4) |
| C(96)-C(80)-C(81) | 115.5(4) |
| N(10)-C(81)-C(80) | 123.4(4) |
| N(10)-C(81)-S(4)  | 116.2(3) |
| C(80)-C(81)-S(4)  | 120.4(3) |
| C(81)-N(10)-C(82) | 109.7(4) |
| C(83)-S(4)-C(81)  | 88.5(2)  |
| C(87)-C(82)-C(83) | 120.6(5) |
| C(87)-C(82)-N(10) | 124.4(5) |
| C(83)-C(82)-N(10) | 115.0(4) |
| C(82)-C(83)-C(84) | 121.5(5) |
| C(82)-C(83)-S(4)  | 110.5(4) |
| C(84)-C(83)-S(4)  | 128.0(4) |
| C(85)-C(84)-C(83) | 117.3(5) |
| C(85)-C(84)-H(84) | 121.4    |
| C(83)-C(84)-H(84) | 121.4    |
| C(86)-C(85)-C(84) | 120.5(5) |
| C(86)-C(85)-H(85) | 119.8    |
| C(84)-C(85)-H(85) | 119.8    |

|                     |          |
|---------------------|----------|
| C(87)-C(86)-C(85)   | 122.3(5) |
| C(87)-C(86)-H(86)   | 118.9    |
| C(85)-C(86)-H(86)   | 118.9    |
| C(86)-C(87)-C(82)   | 117.9(5) |
| C(86)-C(87)-H(87)   | 121.0    |
| C(82)-C(87)-H(87)   | 121.0    |
| C(73)-O(4)-C(88)    | 119.4(3) |
| O(4)-C(88)-C(89)    | 107.5(3) |
| O(4)-C(88)-H(88A)   | 110.2    |
| C(89)-C(88)-H(88A)  | 110.2    |
| O(4)-C(88)-H(88B)   | 110.2    |
| C(89)-C(88)-H(88B)  | 110.2    |
| H(88A)-C(88)-H(88B) | 108.5    |
| C(88)-C(89)-C(90)   | 112.1(4) |
| C(88)-C(89)-H(89A)  | 109.2    |
| C(90)-C(89)-H(89A)  | 109.2    |
| C(88)-C(89)-H(89B)  | 109.2    |
| C(90)-C(89)-H(89B)  | 109.2    |
| H(89A)-C(89)-H(89B) | 107.9    |
| C(91)-C(90)-C(89)   | 112.6(4) |
| C(91)-C(90)-H(90A)  | 109.1    |
| C(89)-C(90)-H(90A)  | 109.1    |
| C(91)-C(90)-H(90B)  | 109.1    |
| C(89)-C(90)-H(90B)  | 109.1    |
| H(90A)-C(90)-H(90B) | 107.8    |
| C(90)-C(91)-H(91A)  | 109.5    |
| C(90)-C(91)-H(91B)  | 109.5    |
| H(91A)-C(91)-H(91B) | 109.5    |
| C(90)-C(91)-H(91C)  | 109.5    |
| H(91A)-C(91)-H(91C) | 109.5    |
| H(91B)-C(91)-H(91C) | 109.5    |
| C(75)-N(11)-C(92)   | 121.2(4) |
| C(75)-N(11)-C(94)   | 121.9(4) |
| C(92)-N(11)-C(94)   | 116.9(4) |
| N(11)-C(92)-C(93)   | 113.7(4) |
| N(11)-C(92)-H(92A)  | 108.8    |

|                     |          |
|---------------------|----------|
| C(93)-C(92)-H(92A)  | 108.8    |
| N(11)-C(92)-H(92B)  | 108.8    |
| C(93)-C(92)-H(92B)  | 108.8    |
| H(92A)-C(92)-H(92B) | 107.7    |
| C(92)-C(93)-H(93A)  | 109.5    |
| C(92)-C(93)-H(93B)  | 109.5    |
| H(93A)-C(93)-H(93B) | 109.5    |
| C(92)-C(93)-H(93C)  | 109.5    |
| H(93A)-C(93)-H(93C) | 109.5    |
| H(93B)-C(93)-H(93C) | 109.5    |
| N(11)-C(94)-C(95)   | 113.4(5) |
| N(11)-C(94)-H(94A)  | 108.9    |
| C(95)-C(94)-H(94A)  | 108.9    |
| N(11)-C(94)-H(94B)  | 108.9    |
| C(95)-C(94)-H(94B)  | 108.9    |
| H(94A)-C(94)-H(94B) | 107.7    |
| C(94)-C(95)-H(95A)  | 109.5    |
| C(94)-C(95)-H(95B)  | 109.5    |
| H(95A)-C(95)-H(95B) | 109.5    |
| C(94)-C(95)-H(95C)  | 109.5    |
| H(95A)-C(95)-H(95C) | 109.5    |
| H(95B)-C(95)-H(95C) | 109.5    |
| N(12)-C(96)-C(80)   | 178.6(6) |

---

Symmetry transformations used to generate equivalent atoms:

**Table S9.** Anisotropic displacement parameters ( $\text{\AA}^2 \times 10^3$ ) for **CV4-R**. The anisotropic displacement factor exponent takes the form:  $-2\pi^2[h^2a^{*2}U^{11} + \dots + 2hka^*b^*U^{12}]$ .

|       | U <sup>11</sup> | U <sup>22</sup> | U <sup>33</sup> | U <sup>23</sup> | U <sup>13</sup> | U <sup>12</sup> |
|-------|-----------------|-----------------|-----------------|-----------------|-----------------|-----------------|
| C(1)  | 42(3)           | 42(3)           | 40(3)           | 3(2)            | -1(2)           | -18(2)          |
| C(2)  | 45(3)           | 61(4)           | 35(3)           | -2(2)           | -6(2)           | -24(3)          |
| C(3)  | 53(3)           | 56(4)           | 42(3)           | -3(2)           | -8(3)           | -23(3)          |
| C(4)  | 49(3)           | 66(4)           | 39(3)           | -5(3)           | 0(2)            | -23(3)          |
| C(5)  | 59(3)           | 53(4)           | 36(3)           | -7(2)           | -1(3)           | -15(3)          |
| C(6)  | 52(3)           | 43(3)           | 42(3)           | 2(2)            | -7(2)           | -16(3)          |
| C(7)  | 54(3)           | 38(3)           | 38(3)           | 4(2)            | -12(2)          | -14(2)          |
| C(8)  | 54(3)           | 43(3)           | 39(3)           | 2(2)            | -7(2)           | -13(3)          |
| N(1)  | 46(2)           | 45(3)           | 45(3)           | -2(2)           | -5(2)           | -11(2)          |
| S(1)  | 70(1)           | 89(1)           | 39(1)           | -4(1)           | -3(1)           | -36(1)          |
| C(9)  | 56(3)           | 44(3)           | 33(3)           | -2(2)           | -6(2)           | -14(3)          |
| C(10) | 49(3)           | 44(3)           | 41(3)           | -4(2)           | -13(3)          | -5(2)           |
| C(11) | 55(3)           | 55(4)           | 44(3)           | 2(2)            | -6(3)           | -18(3)          |
| C(12) | 63(4)           | 88(5)           | 57(4)           | -1(3)           | 0(3)            | -33(4)          |
| C(13) | 64(4)           | 59(4)           | 74(4)           | -1(3)           | -19(3)          | -27(3)          |
| C(14) | 64(4)           | 53(4)           | 54(4)           | -2(3)           | -12(3)          | -14(3)          |
| C(15) | 66(4)           | 52(4)           | 51(3)           | 4(3)            | -14(3)          | -14(3)          |
| O(1)  | 47(2)           | 65(3)           | 35(2)           | 1(2)            | -8(2)           | -19(2)          |
| C(16) | 49(3)           | 51(3)           | 32(3)           | -1(2)           | -1(2)           | -18(3)          |
| C(17) | 44(3)           | 47(3)           | 51(3)           | 6(2)            | -16(2)          | -18(2)          |
| C(18) | 43(3)           | 72(4)           | 48(3)           | 2(3)            | -10(2)          | -19(3)          |
| C(19) | 67(4)           | 157(8)          | 74(5)           | 9(5)            | 4(4)            | -54(5)          |
| N(2)  | 46(3)           | 105(4)          | 52(3)           | -23(3)          | -2(2)           | -28(3)          |
| C(20) | 52(3)           | 71(4)           | 53(3)           | 4(3)            | -13(3)          | -17(3)          |
| C(21) | 65(4)           | 78(5)           | 68(4)           | 2(3)            | -7(3)           | -29(3)          |
| C(22) | 52(5)           | 87(7)           | 344(17)         | -82(9)          | -30(7)          | -23(5)          |

|       |        |         |        |        |        |          |
|-------|--------|---------|--------|--------|--------|----------|
| C(23) | 130(8) | 286(15) | 116(7) | 112(9) | -70(6) | -143(10) |
| C(24) | 62(4)  | 63(4)   | 42(3)  | 2(3)   | -15(3) | -18(3)   |
| N(3)  | 68(3)  | 115(5)  | 45(3)  | 0(3)   | -2(3)  | -32(3)   |
| C(25) | 48(3)  | 42(3)   | 39(3)  | 3(2)   | -1(2)  | -15(2)   |
| C(26) | 41(3)  | 53(3)   | 31(3)  | 6(2)   | -13(2) | -17(2)   |
| C(27) | 43(3)  | 61(4)   | 40(3)  | 4(2)   | -7(2)  | -18(3)   |
| C(28) | 38(3)  | 99(5)   | 44(3)  | 16(3)  | -5(3)  | -28(3)   |
| C(29) | 46(3)  | 77(4)   | 35(3)  | 2(3)   | -4(2)  | -19(3)   |
| C(30) | 42(3)  | 44(3)   | 37(3)  | 4(2)   | -6(2)  | -11(2)   |
| C(31) | 49(3)  | 44(3)   | 36(3)  | 2(2)   | -2(2)  | -17(2)   |
| C(32) | 43(3)  | 41(3)   | 39(3)  | 3(2)   | -5(2)  | -9(2)    |
| C(33) | 48(3)  | 47(3)   | 30(3)  | 1(2)   | -11(2) | -13(2)   |
| N(4)  | 49(3)  | 44(3)   | 37(2)  | 2(2)   | -7(2)  | -14(2)   |
| S(2)  | 58(1)  | 62(1)   | 37(1)  | 3(1)   | -9(1)  | -24(1)   |
| C(34) | 50(3)  | 35(3)   | 41(3)  | -3(2)  | -7(2)  | -5(2)    |
| C(35) | 46(3)  | 47(3)   | 43(3)  | -9(2)  | -5(2)  | -14(2)   |
| C(36) | 55(3)  | 65(4)   | 43(3)  | -5(3)  | -2(3)  | -27(3)   |
| C(37) | 54(3)  | 57(4)   | 54(3)  | -18(3) | -8(3)  | -16(3)   |
| C(38) | 59(4)  | 51(4)   | 49(3)  | -7(3)  | -13(3) | -9(3)    |
| C(39) | 58(3)  | 54(4)   | 36(3)  | 0(2)   | -8(3)  | -13(3)   |
| O(2)  | 44(2)  | 61(2)   | 37(2)  | 7(2)   | -7(2)  | -24(2)   |
| C(40) | 47(3)  | 46(3)   | 41(3)  | 2(2)   | -6(2)  | -21(2)   |
| C(41) | 43(3)  | 45(3)   | 49(3)  | 1(2)   | -6(2)  | -17(2)   |
| C(42) | 53(3)  | 91(5)   | 58(4)  | 15(3)  | -9(3)  | -37(3)   |
| C(43) | 61(4)  | 121(6)  | 79(5)  | 21(4)  | 1(3)   | -43(4)   |
| N(5)  | 39(2)  | 93(4)   | 48(3)  | 16(2)  | -7(2)  | -28(3)   |
| C(44) | 70(4)  | 79(5)   | 63(4)  | 4(3)   | -22(3) | -29(4)   |
| C(45) | 75(4)  | 99(6)   | 62(4)  | -9(4)  | -13(3) | -10(4)   |

|       |       |       |       |       |        |        |
|-------|-------|-------|-------|-------|--------|--------|
| C(46) | 44(3) | 67(4) | 44(3) | 9(3)  | -12(2) | -26(3) |
| C(47) | 64(4) | 61(4) | 51(3) | 6(3)  | -15(3) | -22(3) |
| C(48) | 54(3) | 43(3) | 41(3) | -3(2) | -17(3) | -8(3)  |
| N(6)  | 72(3) | 84(4) | 45(3) | 14(2) | -10(2) | -38(3) |
| C(49) | 45(3) | 45(3) | 40(3) | -1(2) | 3(2)   | -17(2) |
| C(50) | 41(3) | 51(3) | 33(3) | 4(2)  | -13(2) | -20(2) |
| C(51) | 43(3) | 48(3) | 43(3) | 3(2)  | -3(2)  | -17(2) |
| C(52) | 49(3) | 66(4) | 38(3) | 2(2)  | 4(2)   | -27(3) |
| C(53) | 55(3) | 56(4) | 37(3) | 6(2)  | -5(3)  | -18(3) |
| C(54) | 46(3) | 47(3) | 36(3) | 5(2)  | -5(2)  | -14(2) |
| C(55) | 44(3) | 44(3) | 41(3) | 2(2)  | -2(2)  | -13(2) |
| C(56) | 48(3) | 46(3) | 37(3) | 7(2)  | -6(2)  | -16(2) |
| C(57) | 48(3) | 44(3) | 30(3) | 2(2)  | -7(2)  | -13(2) |
| N(7)  | 41(2) | 42(3) | 60(3) | 6(2)  | -10(2) | -16(2) |
| S(3)  | 62(1) | 59(1) | 42(1) | 3(1)  | -5(1)  | -22(1) |
| C(58) | 56(3) | 44(3) | 36(3) | 4(2)  | -2(2)  | -14(3) |
| C(59) | 51(3) | 46(3) | 38(3) | 1(2)  | -4(2)  | -17(3) |
| C(60) | 64(4) | 57(4) | 44(3) | 0(3)  | 4(3)   | -26(3) |
| C(61) | 60(4) | 63(4) | 67(4) | -9(3) | -8(3)  | -23(3) |
| C(62) | 76(4) | 61(4) | 44(3) | -5(3) | -13(3) | -15(3) |
| C(63) | 62(4) | 58(4) | 44(3) | 8(3)  | -10(3) | -20(3) |
| O(3)  | 51(2) | 65(3) | 41(2) | 11(2) | -7(2)  | -29(2) |
| C(64) | 51(3) | 45(3) | 41(3) | 7(2)  | -5(2)  | -18(3) |
| C(65) | 43(3) | 52(3) | 42(3) | 6(2)  | -12(2) | -20(2) |
| C(66) | 41(3) | 58(4) | 44(3) | -4(2) | -5(2)  | -16(3) |
| C(67) | 57(4) | 99(5) | 65(4) | 8(3)  | 7(3)   | -35(4) |
| N(8)  | 42(2) | 62(3) | 40(2) | 8(2)  | -6(2)  | -23(2) |
| C(68) | 49(3) | 76(4) | 50(3) | 5(3)  | -8(3)  | -28(3) |

|       |       |        |       |       |        |        |
|-------|-------|--------|-------|-------|--------|--------|
| C(69) | 56(4) | 99(5)  | 64(4) | 2(4)  | 4(3)   | -28(4) |
| C(70) | 40(3) | 51(3)  | 34(3) | 1(2)  | -5(2)  | -17(2) |
| C(71) | 59(4) | 57(4)  | 62(4) | 9(3)  | -4(3)  | -19(3) |
| C(72) | 57(4) | 57(4)  | 48(3) | 9(3)  | -20(3) | -19(3) |
| N(9)  | 63(3) | 103(4) | 44(3) | 9(3)  | 0(2)   | -31(3) |
| C(73) | 38(3) | 44(3)  | 36(3) | 4(2)  | 1(2)   | -17(2) |
| C(74) | 40(3) | 49(3)  | 37(3) | 0(2)  | -2(2)  | -19(2) |
| C(75) | 49(3) | 47(3)  | 37(3) | 2(2)  | -5(2)  | -24(3) |
| C(76) | 42(3) | 59(4)  | 42(3) | 5(2)  | 1(2)   | -22(3) |
| C(77) | 45(3) | 53(3)  | 35(3) | -1(2) | -1(2)  | -18(3) |
| C(78) | 42(3) | 44(3)  | 38(3) | 0(2)  | 1(2)   | -19(2) |
| C(79) | 45(3) | 37(3)  | 36(3) | 6(2)  | 2(2)   | -13(2) |
| C(80) | 39(3) | 46(3)  | 34(3) | 1(2)  | -2(2)  | -13(2) |
| C(81) | 44(3) | 41(3)  | 31(3) | 3(2)  | -6(2)  | -17(2) |
| N(10) | 44(2) | 47(3)  | 48(3) | 4(2)  | -6(2)  | -15(2) |
| S(4)  | 53(1) | 59(1)  | 40(1) | -1(1) | 1(1)   | -25(1) |
| C(82) | 48(3) | 46(3)  | 40(3) | 2(2)  | -5(2)  | -15(3) |
| C(83) | 48(3) | 43(3)  | 43(3) | 4(2)  | -7(2)  | -16(2) |
| C(84) | 50(3) | 45(3)  | 60(4) | 3(3)  | 1(3)   | -15(3) |
| C(85) | 58(4) | 49(4)  | 67(4) | 1(3)  | -19(3) | -22(3) |
| C(86) | 72(4) | 47(4)  | 59(4) | 4(3)  | -17(3) | -22(3) |
| C(87) | 64(4) | 55(4)  | 41(3) | 3(2)  | -11(3) | -22(3) |
| O(4)  | 41(2) | 68(2)  | 36(2) | -3(2) | 2(2)   | -29(2) |
| C(88) | 45(3) | 60(3)  | 26(3) | -1(2) | 5(2)   | -21(3) |
| C(89) | 36(3) | 51(3)  | 38(3) | 2(2)  | -3(2)  | -15(2) |
| C(90) | 37(3) | 54(3)  | 44(3) | 2(2)  | 0(2)   | -14(2) |
| C(91) | 53(3) | 86(5)  | 59(4) | 2(3)  | 9(3)   | -31(3) |
| N(11) | 45(2) | 64(3)  | 42(2) | 2(2)  | 0(2)   | -28(2) |



|       |       |       |       |        |        |        |
|-------|-------|-------|-------|--------|--------|--------|
| C(92) | 46(3) | 59(4) | 55(3) | 4(3)   | -4(3)  | -27(3) |
| C(93) | 50(3) | 80(5) | 63(4) | -11(3) | 0(3)   | -25(3) |
| C(94) | 45(3) | 73(4) | 51(3) | 6(3)   | -11(3) | -31(3) |
| C(95) | 62(4) | 80(5) | 64(4) | 7(3)   | -10(3) | -30(3) |
| C(96) | 60(3) | 55(4) | 34(3) | 5(2)   | -6(3)  | -30(3) |
| N(12) | 71(3) | 90(4) | 37(3) | 1(2)   | -2(2)  | -42(3) |

---

**Table S10.** Hydrogen coordinates ( $\times 10^4$ ) and isotropic displacement parameters ( $\text{\AA}^2 \times 10^3$ ) for **CV4-R**.

|        | x     | y    | z     | U(eq) |
|--------|-------|------|-------|-------|
| H(2)   | 2306  | 845  | 9149  | 55    |
| H(4)   | -366  | 1859 | 10375 | 61    |
| H(5)   | 1100  | 1898 | 10917 | 61    |
| H(7)   | 4294  | 1472 | 10456 | 52    |
| H(12)  | 8235  | 2027 | 11248 | 81    |
| H(13)  | 8923  | 2083 | 12092 | 76    |
| H(14)  | 7712  | 2034 | 12865 | 70    |
| H(15)  | 5805  | 1895 | 12832 | 69    |
| H(16A) | 3884  | 1314 | 8877  | 53    |
| H(16B) | 4465  | 251  | 8946  | 53    |
| H(17A) | 6319  | 374  | 9153  | 55    |
| H(17B) | 5743  | 1441 | 9124  | 55    |
| H(18A) | 6130  | 242  | 8225  | 65    |
| H(18B) | 5551  | 1307 | 8196  | 65    |
| H(19A) | 7425  | 1410 | 8390  | 144   |
| H(19B) | 7602  | 811  | 7857  | 144   |
| H(19C) | 8004  | 342  | 8409  | 144   |
| H(20A) | -1866 | 1762 | 9259  | 71    |
| H(20B) | -1603 | 2118 | 9813  | 71    |
| H(21A) | -1564 | 364  | 9608  | 103   |
| H(21B) | -2569 | 1103 | 10001 | 103   |
| H(21C) | -1184 | 664  | 10153 | 103   |
| H(22A) | -442  | 1411 | 8451  | 192   |
| H(22B) | 978   | 1349 | 8508  | 192   |
| H(23A) | 1262  | 180  | 8991  | 233   |
| H(23B) | 809   | -16  | 8437  | 233   |

|        |       |      |      |     |
|--------|-------|------|------|-----|
| H(23C) | -138  | 254  | 8966 | 233 |
| H(26)  | 7770  | 947  | 6648 | 49  |
| H(28)  | 9895  | 1320 | 5359 | 71  |
| H(29)  | 8422  | 1348 | 4819 | 64  |
| H(31)  | 5484  | 1139 | 5273 | 52  |
| H(36)  | 1359  | 1007 | 4457 | 63  |
| H(37)  | 419   | 1360 | 3668 | 67  |
| H(38)  | 1426  | 1761 | 2927 | 66  |
| H(39)  | 3362  | 1888 | 2956 | 61  |
| H(40A) | 5703  | 1323 | 6917 | 52  |
| H(40B) | 6364  | 270  | 6784 | 52  |
| H(41A) | 4492  | 188  | 6552 | 54  |
| H(41B) | 3828  | 1242 | 6670 | 54  |
| H(42A) | 4805  | -49  | 7461 | 77  |
| H(42B) | 4272  | 1004 | 7591 | 77  |
| H(43A) | 2316  | 1070 | 7432 | 127 |
| H(43B) | 2831  | 332  | 7869 | 127 |
| H(43C) | 2832  | 29   | 7262 | 127 |
| H(44A) | 10734 | 1845 | 5913 | 83  |
| H(44B) | 11246 | 1658 | 6490 | 83  |
| H(45A) | 12171 | 157  | 6252 | 126 |
| H(45B) | 12668 | 763  | 5850 | 126 |
| H(45C) | 11680 | 358  | 5673 | 126 |
| H(46A) | 8844  | 1346 | 7112 | 60  |
| H(46B) | 10243 | 1248 | 7157 | 60  |
| H(47A) | 9408  | -177 | 6963 | 87  |
| H(47B) | 9959  | -7   | 7496 | 87  |
| H(47C) | 10835 | -301 | 6947 | 87  |

|        |       |      |      |     |
|--------|-------|------|------|-----|
| H(50)  | 7688  | 6206 | 5875 | 48  |
| H(52)  | 9629  | 6899 | 4627 | 60  |
| H(53)  | 8124  | 6979 | 4093 | 60  |
| H(55)  | 5290  | 6617 | 4534 | 53  |
| H(60)  | 1159  | 6455 | 3732 | 65  |
| H(61)  | 403   | 6518 | 2894 | 75  |
| H(62)  | 1534  | 6733 | 2126 | 75  |
| H(63)  | 3455  | 6856 | 2159 | 66  |
| H(64A) | 5629  | 6542 | 6147 | 54  |
| H(64B) | 6341  | 5498 | 6002 | 54  |
| H(65A) | 4513  | 5344 | 5781 | 53  |
| H(65B) | 3789  | 6397 | 5878 | 53  |
| H(66A) | 4809  | 5178 | 6695 | 57  |
| H(66B) | 4183  | 6235 | 6802 | 57  |
| H(67A) | 2275  | 6194 | 6644 | 108 |
| H(67B) | 2831  | 5467 | 7081 | 108 |
| H(67C) | 2873  | 5155 | 6472 | 108 |
| H(68A) | 11181 | 6893 | 5747 | 68  |
| H(68B) | 10606 | 7198 | 5192 | 68  |
| H(69A) | 12104 | 5421 | 5412 | 110 |
| H(69B) | 12523 | 6076 | 5019 | 110 |
| H(69C) | 11491 | 5699 | 4863 | 110 |
| H(70A) | 8812  | 6481 | 6352 | 50  |
| H(70B) | 10196 | 6426 | 6397 | 50  |
| H(71A) | 9582  | 4969 | 6024 | 90  |
| H(71B) | 9932  | 5060 | 6618 | 90  |
| H(71C) | 10942 | 4923 | 6117 | 90  |
| H(74)  | 2649  | 5468 | 8364 | 50  |

|        |       |      |       |     |
|--------|-------|------|-------|-----|
| H(76)  | 278   | 5685 | 9693  | 57  |
| H(77)  | 1603  | 6009 | 10205 | 53  |
| H(79)  | 4574  | 6104 | 9693  | 48  |
| H(84)  | 8439  | 6816 | 10438 | 63  |
| H(85)  | 9053  | 7053 | 11278 | 68  |
| H(86)  | 7802  | 7086 | 12057 | 70  |
| H(87)  | 5900  | 6916 | 12040 | 64  |
| H(88A) | 4067  | 6082 | 8084  | 52  |
| H(88B) | 4756  | 5030 | 8161  | 52  |
| H(89A) | 6562  | 5254 | 8324  | 50  |
| H(89B) | 5886  | 6318 | 8339  | 50  |
| H(90A) | 6343  | 5194 | 7400  | 55  |
| H(90B) | 5632  | 6254 | 7411  | 55  |
| H(91A) | 7423  | 6496 | 7598  | 97  |
| H(91B) | 7708  | 5883 | 7064  | 97  |
| H(91C) | 8140  | 5441 | 7619  | 97  |
| H(92A) | -395  | 4894 | 9251  | 61  |
| H(92B) | -770  | 4769 | 8667  | 61  |
| H(93A) | -1479 | 6465 | 9215  | 96  |
| H(93B) | -2374 | 5908 | 9173  | 96  |
| H(93C) | -1901 | 6307 | 8646  | 96  |
| H(94A) | 278   | 4898 | 7942  | 64  |
| H(94B) | 1644  | 4890 | 7977  | 64  |
| H(95A) | -425  | 6483 | 7925  | 101 |
| H(95B) | 537   | 6023 | 7421  | 101 |
| H(95C) | 973   | 6433 | 7912  | 101 |

---

**Table S11.** Torsion angles [°] for **CV4-R**.

---

|                         |           |
|-------------------------|-----------|
| O(1)-C(1)-C(2)-C(3)     | -176.1(5) |
| C(6)-C(1)-C(2)-C(3)     | 4.8(7)    |
| C(1)-C(2)-C(3)-N(2)     | 177.2(5)  |
| C(1)-C(2)-C(3)-C(4)     | -2.8(7)   |
| N(2)-C(3)-C(4)-C(5)     | 179.5(5)  |
| C(2)-C(3)-C(4)-C(5)     | -0.5(8)   |
| C(3)-C(4)-C(5)-C(6)     | 1.9(8)    |
| C(4)-C(5)-C(6)-C(1)     | 0.0(7)    |
| C(4)-C(5)-C(6)-C(7)     | 175.5(5)  |
| O(1)-C(1)-C(6)-C(5)     | 177.6(4)  |
| C(2)-C(1)-C(6)-C(5)     | -3.3(7)   |
| O(1)-C(1)-C(6)-C(7)     | 1.7(6)    |
| C(2)-C(1)-C(6)-C(7)     | -179.2(4) |
| C(5)-C(6)-C(7)-C(8)     | 15.0(9)   |
| C(1)-C(6)-C(7)-C(8)     | -169.6(5) |
| C(6)-C(7)-C(8)-C(24)    | 6.0(9)    |
| C(6)-C(7)-C(8)-C(9)     | -177.5(5) |
| C(10)-N(1)-C(9)-C(8)    | -179.5(4) |
| C(10)-N(1)-C(9)-S(1)    | -1.3(5)   |
| C(7)-C(8)-C(9)-N(1)     | -172.0(5) |
| C(24)-C(8)-C(9)-N(1)    | 4.7(7)    |
| C(7)-C(8)-C(9)-S(1)     | 9.9(7)    |
| C(24)-C(8)-C(9)-S(1)    | -173.3(4) |
| C(11)-S(1)-C(9)-N(1)    | 1.5(4)    |
| C(11)-S(1)-C(9)-C(8)    | 179.7(4)  |
| C(9)-N(1)-C(10)-C(15)   | -179.3(5) |
| C(9)-N(1)-C(10)-C(11)   | 0.4(6)    |
| N(1)-C(10)-C(11)-C(12)  | -178.5(5) |
| C(15)-C(10)-C(11)-C(12) | 1.2(8)    |
| N(1)-C(10)-C(11)-S(1)   | 0.7(6)    |
| C(15)-C(10)-C(11)-S(1)  | -179.6(4) |
| C(9)-S(1)-C(11)-C(12)   | 177.9(6)  |
| C(9)-S(1)-C(11)-C(10)   | -1.1(4)   |
| C(10)-C(11)-C(12)-C(13) | -0.7(8)   |

|                         |           |
|-------------------------|-----------|
| S(1)-C(11)-C(12)-C(13)  | -179.6(5) |
| C(11)-C(12)-C(13)-C(14) | -0.3(9)   |
| C(12)-C(13)-C(14)-C(15) | 0.8(9)    |
| C(13)-C(14)-C(15)-C(10) | -0.3(8)   |
| N(1)-C(10)-C(15)-C(14)  | 178.9(5)  |
| C(11)-C(10)-C(15)-C(14) | -0.7(8)   |
| C(2)-C(1)-O(1)-C(16)    | 13.5(6)   |
| C(6)-C(1)-O(1)-C(16)    | -167.4(4) |
| C(1)-O(1)-C(16)-C(17)   | 164.5(4)  |
| O(1)-C(16)-C(17)-C(18)  | -176.4(4) |
| C(16)-C(17)-C(18)-C(19) | 179.8(5)  |
| C(2)-C(3)-N(2)-C(20)    | 179.7(5)  |
| C(4)-C(3)-N(2)-C(20)    | -0.2(8)   |
| C(2)-C(3)-N(2)-C(22)    | -15.0(8)  |
| C(4)-C(3)-N(2)-C(22)    | 165.0(5)  |
| C(3)-N(2)-C(20)-C(21)   | -83.6(6)  |
| C(22)-N(2)-C(20)-C(21)  | 110.2(6)  |
| C(3)-N(2)-C(22)-C(23)   | 92.2(7)   |
| C(20)-N(2)-C(22)-C(23)  | -101.4(7) |
| C(7)-C(8)-C(24)-N(3)    | 5(22)     |
| C(9)-C(8)-C(24)-N(3)    | -172(100) |
| O(2)-C(25)-C(26)-C(27)  | -178.3(4) |
| C(30)-C(25)-C(26)-C(27) | 1.5(7)    |
| C(25)-C(26)-C(27)-N(5)  | 176.5(5)  |
| C(25)-C(26)-C(27)-C(28) | -3.1(7)   |
| N(5)-C(27)-C(28)-C(29)  | -177.5(5) |
| C(26)-C(27)-C(28)-C(29) | 2.1(8)    |
| C(27)-C(28)-C(29)-C(30) | 0.6(9)    |
| C(28)-C(29)-C(30)-C(25) | -2.2(8)   |
| C(28)-C(29)-C(30)-C(31) | 178.0(5)  |
| O(2)-C(25)-C(30)-C(29)  | -179.0(4) |
| C(26)-C(25)-C(30)-C(29) | 1.2(7)    |
| O(2)-C(25)-C(30)-C(31)  | 0.8(6)    |
| C(26)-C(25)-C(30)-C(31) | -179.0(4) |
| C(29)-C(30)-C(31)-C(32) | -5.5(9)   |
| C(25)-C(30)-C(31)-C(32) | 174.7(5)  |

|                         |           |
|-------------------------|-----------|
| C(30)-C(31)-C(32)-C(48) | -3.0(9)   |
| C(30)-C(31)-C(32)-C(33) | 178.0(5)  |
| C(31)-C(32)-C(33)-N(4)  | 175.9(5)  |
| C(48)-C(32)-C(33)-N(4)  | -3.2(7)   |
| C(31)-C(32)-C(33)-S(2)  | -3.4(6)   |
| C(48)-C(32)-C(33)-S(2)  | 177.5(3)  |
| C(32)-C(33)-N(4)-C(34)  | -178.6(4) |
| S(2)-C(33)-N(4)-C(34)   | 0.7(5)    |
| N(4)-C(33)-S(2)-C(35)   | -1.3(4)   |
| C(32)-C(33)-S(2)-C(35)  | 178.1(4)  |
| C(33)-N(4)-C(34)-C(39)  | -180.0(5) |
| C(33)-N(4)-C(34)-C(35)  | 0.4(6)    |
| C(39)-C(34)-C(35)-C(36) | -1.3(7)   |
| N(4)-C(34)-C(35)-C(36)  | 178.3(4)  |
| C(39)-C(34)-C(35)-S(2)  | 179.0(4)  |
| N(4)-C(34)-C(35)-S(2)   | -1.3(5)   |
| C(33)-S(2)-C(35)-C(36)  | -178.2(5) |
| C(33)-S(2)-C(35)-C(34)  | 1.4(4)    |
| C(34)-C(35)-C(36)-C(37) | -0.5(7)   |
| S(2)-C(35)-C(36)-C(37)  | 179.0(4)  |
| C(35)-C(36)-C(37)-C(38) | 1.9(8)    |
| C(36)-C(37)-C(38)-C(39) | -1.5(8)   |
| N(4)-C(34)-C(39)-C(38)  | -177.9(4) |
| C(35)-C(34)-C(39)-C(38) | 1.7(7)    |
| C(37)-C(38)-C(39)-C(34) | -0.3(7)   |
| C(26)-C(25)-O(2)-C(40)  | -3.6(6)   |
| C(30)-C(25)-O(2)-C(40)  | 176.6(4)  |
| C(25)-O(2)-C(40)-C(41)  | -176.1(4) |
| O(2)-C(40)-C(41)-C(42)  | -178.6(4) |
| C(40)-C(41)-C(42)-C(43) | 174.4(5)  |
| C(26)-C(27)-N(5)-C(46)  | 4.3(8)    |
| C(28)-C(27)-N(5)-C(46)  | -176.1(5) |
| C(26)-C(27)-N(5)-C(44)  | -173.0(5) |
| C(28)-C(27)-N(5)-C(44)  | 6.6(8)    |
| C(27)-N(5)-C(44)-C(45)  | -86.6(6)  |
| C(46)-N(5)-C(44)-C(45)  | 95.9(6)   |



|                         |           |
|-------------------------|-----------|
| C(27)-N(5)-C(46)-C(47)  | 77.8(6)   |
| C(44)-N(5)-C(46)-C(47)  | -104.8(5) |
| C(31)-C(32)-C(48)-N(6)  | -3(26)    |
| C(33)-C(32)-C(48)-N(6)  | 176(100)  |
| O(3)-C(49)-C(50)-C(51)  | 178.8(4)  |
| C(54)-C(49)-C(50)-C(51) | 1.4(7)    |
| C(49)-C(50)-C(51)-N(8)  | 179.4(4)  |
| C(49)-C(50)-C(51)-C(52) | -0.4(7)   |
| N(8)-C(51)-C(52)-C(53)  | 180.0(5)  |
| C(50)-C(51)-C(52)-C(53) | -0.3(7)   |
| C(51)-C(52)-C(53)-C(54) | -0.1(8)   |
| C(52)-C(53)-C(54)-C(55) | -179.3(5) |
| C(52)-C(53)-C(54)-C(49) | 1.0(7)    |
| O(3)-C(49)-C(54)-C(53)  | -179.2(4) |
| C(50)-C(49)-C(54)-C(53) | -1.7(7)   |
| O(3)-C(49)-C(54)-C(55)  | 1.0(7)    |
| C(50)-C(49)-C(54)-C(55) | 178.6(4)  |
| C(53)-C(54)-C(55)-C(56) | 8.7(9)    |
| C(49)-C(54)-C(55)-C(56) | -171.6(5) |
| C(54)-C(55)-C(56)-C(72) | 1.0(9)    |
| C(54)-C(55)-C(56)-C(57) | 178.0(5)  |
| C(55)-C(56)-C(57)-N(7)  | -179.4(5) |
| C(72)-C(56)-C(57)-N(7)  | -2.1(7)   |
| C(55)-C(56)-C(57)-S(3)  | -0.5(7)   |
| C(72)-C(56)-C(57)-S(3)  | 176.8(4)  |
| C(56)-C(57)-N(7)-C(58)  | 178.5(4)  |
| S(3)-C(57)-N(7)-C(58)   | -0.5(5)   |
| N(7)-C(57)-S(3)-C(59)   | 0.5(4)    |
| C(56)-C(57)-S(3)-C(59)  | -178.5(4) |
| C(57)-N(7)-C(58)-C(63)  | -179.7(5) |
| C(57)-N(7)-C(58)-C(59)  | 0.2(6)    |
| C(63)-C(58)-C(59)-C(60) | -0.2(8)   |
| N(7)-C(58)-C(59)-C(60)  | 179.9(4)  |
| C(63)-C(58)-C(59)-S(3)  | -180.0(4) |
| N(7)-C(58)-C(59)-S(3)   | 0.1(6)    |
| C(57)-S(3)-C(59)-C(60)  | 179.9(5)  |

|                         |           |
|-------------------------|-----------|
| C(57)-S(3)-C(59)-C(58)  | -0.3(4)   |
| C(58)-C(59)-C(60)-C(61) | 0.4(8)    |
| S(3)-C(59)-C(60)-C(61)  | -179.9(4) |
| C(59)-C(60)-C(61)-C(62) | -0.6(8)   |
| C(60)-C(61)-C(62)-C(63) | 0.7(9)    |
| C(61)-C(62)-C(63)-C(58) | -0.6(8)   |
| N(7)-C(58)-C(63)-C(62)  | -179.8(5) |
| C(59)-C(58)-C(63)-C(62) | 0.3(8)    |
| C(50)-C(49)-O(3)-C(64)  | 4.0(7)    |
| C(54)-C(49)-O(3)-C(64)  | -178.5(4) |
| C(49)-O(3)-C(64)-C(65)  | 179.5(4)  |
| O(3)-C(64)-C(65)-C(66)  | -175.6(4) |
| C(64)-C(65)-C(66)-C(67) | 175.6(4)  |
| C(52)-C(51)-N(8)-C(70)  | -176.4(5) |
| C(50)-C(51)-N(8)-C(70)  | 3.9(7)    |
| C(52)-C(51)-N(8)-C(68)  | 1.3(7)    |
| C(50)-C(51)-N(8)-C(68)  | -178.5(4) |
| C(51)-N(8)-C(68)-C(69)  | -84.2(6)  |
| C(70)-N(8)-C(68)-C(69)  | 93.5(5)   |
| C(51)-N(8)-C(70)-C(71)  | 80.0(5)   |
| C(68)-N(8)-C(70)-C(71)  | -97.7(5)  |
| C(55)-C(56)-C(72)-N(9)  | -30(43)   |
| C(57)-C(56)-C(72)-N(9)  | 153(42)   |
| O(4)-C(73)-C(74)-C(75)  | 177.6(4)  |
| C(78)-C(73)-C(74)-C(75) | -1.7(7)   |
| C(73)-C(74)-C(75)-N(11) | -177.7(4) |
| C(73)-C(74)-C(75)-C(76) | 1.4(7)    |
| N(11)-C(75)-C(76)-C(77) | 178.7(5)  |
| C(74)-C(75)-C(76)-C(77) | -0.4(7)   |
| C(75)-C(76)-C(77)-C(78) | -0.3(8)   |
| C(76)-C(77)-C(78)-C(73) | 0.0(7)    |
| C(76)-C(77)-C(78)-C(79) | -178.8(5) |
| O(4)-C(73)-C(78)-C(77)  | -178.4(4) |
| C(74)-C(73)-C(78)-C(77) | 1.0(7)    |
| O(4)-C(73)-C(78)-C(79)  | 0.4(6)    |
| C(74)-C(73)-C(78)-C(79) | 179.8(4)  |

|                         |           |
|-------------------------|-----------|
| C(77)-C(78)-C(79)-C(80) | -0.1(8)   |
| C(73)-C(78)-C(79)-C(80) | -178.8(5) |
| C(78)-C(79)-C(80)-C(96) | 1.4(8)    |
| C(78)-C(79)-C(80)-C(81) | -178.4(5) |
| C(79)-C(80)-C(81)-N(10) | -176.7(5) |
| C(96)-C(80)-C(81)-N(10) | 3.5(7)    |
| C(79)-C(80)-C(81)-S(4)  | 3.8(6)    |
| C(96)-C(80)-C(81)-S(4)  | -176.0(4) |
| C(80)-C(81)-N(10)-C(82) | 178.8(4)  |
| S(4)-C(81)-N(10)-C(82)  | -1.6(5)   |
| N(10)-C(81)-S(4)-C(83)  | 2.1(4)    |
| C(80)-C(81)-S(4)-C(83)  | -178.4(4) |
| C(81)-N(10)-C(82)-C(87) | -178.7(5) |
| C(81)-N(10)-C(82)-C(83) | 0.2(6)    |
| C(87)-C(82)-C(83)-C(84) | 0.6(8)    |
| N(10)-C(82)-C(83)-C(84) | -178.3(4) |
| C(87)-C(82)-C(83)-S(4)  | -179.7(4) |
| N(10)-C(82)-C(83)-S(4)  | 1.3(6)    |
| C(81)-S(4)-C(83)-C(82)  | -1.8(4)   |
| C(81)-S(4)-C(83)-C(84)  | 177.8(5)  |
| C(82)-C(83)-C(84)-C(85) | -0.3(7)   |
| S(4)-C(83)-C(84)-C(85)  | -179.9(4) |
| C(83)-C(84)-C(85)-C(86) | 0.2(8)    |
| C(84)-C(85)-C(86)-C(87) | -0.5(8)   |
| C(85)-C(86)-C(87)-C(82) | 0.8(8)    |
| C(83)-C(82)-C(87)-C(86) | -0.9(7)   |
| N(10)-C(82)-C(87)-C(86) | 178.0(5)  |
| C(74)-C(73)-O(4)-C(88)  | 4.0(7)    |
| C(78)-C(73)-O(4)-C(88)  | -176.6(4) |
| C(73)-O(4)-C(88)-C(89)  | 175.8(4)  |
| O(4)-C(88)-C(89)-C(90)  | -171.7(4) |
| C(88)-C(89)-C(90)-C(91) | 178.4(4)  |
| C(74)-C(75)-N(11)-C(92) | 173.5(4)  |
| C(76)-C(75)-N(11)-C(92) | -5.6(7)   |
| C(74)-C(75)-N(11)-C(94) | -7.9(7)   |
| C(76)-C(75)-N(11)-C(94) | 173.0(5)  |

|                         |          |
|-------------------------|----------|
| C(75)-N(11)-C(92)-C(93) | 86.0(6)  |
| C(94)-N(11)-C(92)-C(93) | -92.7(5) |
| C(75)-N(11)-C(94)-C(95) | -76.8(6) |
| C(92)-N(11)-C(94)-C(95) | 101.9(5) |
| C(79)-C(80)-C(96)-N(12) | -82(22)  |
| C(81)-C(80)-C(96)-N(12) | 97(22)   |

---

Symmetry transformations used to generate equivalent atoms:

**Table S12.** Crystal data and structure refinement for **CV6-R**.

|                                   |                                                          |
|-----------------------------------|----------------------------------------------------------|
| Identification code               | <b>CV6-R</b>                                             |
| Empirical formula                 | C <sub>26</sub> H <sub>31</sub> N <sub>3</sub> O S       |
| Formula weight                    | 433.60                                                   |
| Temperature                       | 177(2) K                                                 |
| Wavelength                        | 0.71073 Å                                                |
| Crystal system                    | Monoclinic                                               |
| Space group                       | P2(1)/c                                                  |
| Unit cell dimensions              | a = 13.0387(9) Å<br>b = 8.5716(6) Å<br>c = 21.3730(14) Å |
| Volume                            | 2369.3(3) Å <sup>3</sup>                                 |
| Z                                 | 4                                                        |
| Density (calculated)              | 1.216 Mg/m <sup>3</sup>                                  |
| Absorption coefficient            | 0.159 mm <sup>-1</sup>                                   |
| F(000)                            | 928                                                      |
| Crystal size                      | 0.26 x 0.20 x 0.18 mm <sup>3</sup>                       |
| Theta range for data collection   | 1.92 to 28.29°.                                          |
| Index ranges                      | -9<=h<=17, -11<=k<=11, -28<=l<=28                        |
| Reflections collected             | 16941                                                    |
| Independent reflections           | 5881 [R(int) = 0.0433]                                   |
| Completeness to theta = 28.29°    | 99.8 %                                                   |
| Absorption correction             | None                                                     |
| Refinement method                 | Full-matrix least-squares on F <sup>2</sup>              |
| Data / restraints / parameters    | 5881 / 0 / 283                                           |
| Goodness-of-fit on F <sup>2</sup> | 1.145                                                    |
| Final R indices [I>2sigma(I)]     | R1 = 0.0638, wR2 = 0.1456                                |
| R indices (all data)              | R1 = 0.1126, wR2 = 0.2172                                |
| Largest diff. peak and hole       | 0.693 and -0.835 e.Å <sup>-3</sup>                       |

**Table S13.** Atomic coordinates ( $\times 10^4$ ) and equivalent isotropic displacement parameters ( $\text{\AA}^2 \times 10^3$ ) for **CV6-R**.  $U(\text{eq})$  is defined as one third of the trace of the orthogonalized  $U^{ij}$  tensor.

|       | x        | y        | z        | $U(\text{eq})$ |
|-------|----------|----------|----------|----------------|
| C(1)  | 5770(2)  | 8605(3)  | 9016(1)  | 33(1)          |
| C(2)  | 6347(2)  | 8894(3)  | 8536(1)  | 33(1)          |
| C(3)  | 5965(2)  | 9825(3)  | 8009(1)  | 31(1)          |
| C(4)  | 4941(2)  | 10410(4) | 8001(1)  | 37(1)          |
| C(5)  | 4375(2)  | 10094(3) | 8477(1)  | 36(1)          |
| C(6)  | 4742(2)  | 9178(3)  | 9008(1)  | 33(1)          |
| C(7)  | 4171(2)  | 8784(3)  | 9511(1)  | 34(1)          |
| C(8)  | 3159(2)  | 8996(3)  | 9588(1)  | 35(1)          |
| C(9)  | 2729(2)  | 8497(4)  | 10155(1) | 36(1)          |
| N(1)  | 1773(2)  | 8878(3)  | 10257(1) | 45(1)          |
| S(1)  | 3446(1)  | 7339(1)  | 10722(1) | 42(1)          |
| C(10) | 2393(3)  | 7335(4)  | 11145(2) | 40(1)          |
| C(11) | 2303(3)  | 6603(4)  | 11720(2) | 52(1)          |
| C(12) | 1367(4)  | 6773(5)  | 11961(2) | 63(1)          |
| C(13) | 567(3)   | 7644(5)  | 11645(2) | 63(1)          |
| C(14) | 655(3)   | 8361(5)  | 11084(2) | 55(1)          |
| C(15) | 1586(3)  | 8211(4)  | 10828(2) | 43(1)          |
| O(1)  | 6120(2)  | 7728(2)  | 9535(1)  | 36(1)          |
| C(16) | 7146(2)  | 7104(3)  | 9587(1)  | 34(1)          |
| C(17) | 7350(2)  | 6235(4)  | 10205(1) | 36(1)          |
| C(18) | 8411(2)  | 5487(4)  | 10283(1) | 36(1)          |
| C(19) | 8677(2)  | 4593(4)  | 10895(1) | 38(1)          |
| C(20) | 9714(3)  | 3771(4)  | 10930(2) | 48(1)          |
| C(21) | 10024(3) | 2920(5)  | 11551(2) | 64(1)          |
| N(2)  | 6548(2)  | 10169(3) | 7550(1)  | 35(1)          |
| C(22) | 6119(2)  | 11009(4) | 6979(1)  | 40(1)          |

|       |         |          |         |       |
|-------|---------|----------|---------|-------|
| C(23) | 5447(3) | 9999(4)  | 6509(2) | 53(1) |
| C(24) | 7600(2) | 9559(4)  | 7559(1) | 38(1) |
| C(25) | 7636(3) | 7909(4)  | 7316(2) | 46(1) |
| C(26) | 2412(2) | 9714(4)  | 9118(2) | 43(1) |
| N(3)  | 1814(2) | 10252(4) | 8747(2) | 63(1) |

---

**Table S14.** Bond lengths [Å] and angles [°] for **CV6-R**.

---

|              |          |
|--------------|----------|
| C(1)-O(1)    | 1.370(3) |
| C(1)-C(2)    | 1.370(4) |
| C(1)-C(6)    | 1.425(4) |
| C(2)-C(3)    | 1.417(4) |
| C(2)-H(2)    | 0.9500   |
| C(3)-N(2)    | 1.349(4) |
| C(3)-C(4)    | 1.424(4) |
| C(4)-C(5)    | 1.358(4) |
| C(4)-H(4)    | 0.9500   |
| C(5)-C(6)    | 1.412(4) |
| C(5)-H(5)    | 0.9500   |
| C(6)-C(7)    | 1.424(4) |
| C(7)-C(8)    | 1.363(4) |
| C(7)-H(7)    | 0.9500   |
| C(8)-C(26)   | 1.444(4) |
| C(8)-C(9)    | 1.463(4) |
| C(9)-N(1)    | 1.333(4) |
| C(9)-S(1)    | 1.743(3) |
| N(1)-C(15)   | 1.396(4) |
| S(1)-C(10)   | 1.738(3) |
| C(10)-C(11)  | 1.397(5) |
| C(10)-C(15)  | 1.397(5) |
| C(11)-C(12)  | 1.391(6) |
| C(11)-H(11)  | 0.9500   |
| C(12)-C(13)  | 1.386(6) |
| C(12)-H(12)  | 0.9500   |
| C(13)-C(14)  | 1.366(6) |
| C(13)-H(13)  | 0.9500   |
| C(14)-C(15)  | 1.399(5) |
| C(14)-H(14)  | 0.9500   |
| O(1)-C(16)   | 1.432(3) |
| C(16)-C(17)  | 1.510(4) |
| C(16)-H(16A) | 0.9900   |
| C(16)-H(16B) | 0.9900   |



|                |          |
|----------------|----------|
| C(17)-C(18)    | 1.514(4) |
| C(17)-H(17A)   | 0.9900   |
| C(17)-H(17B)   | 0.9900   |
| C(18)-C(19)    | 1.518(4) |
| C(18)-H(18A)   | 0.9900   |
| C(18)-H(18B)   | 0.9900   |
| C(19)-C(20)    | 1.518(4) |
| C(19)-H(19A)   | 0.9900   |
| C(19)-H(19B)   | 0.9900   |
| C(20)-C(21)    | 1.523(5) |
| C(20)-H(20A)   | 0.9900   |
| C(20)-H(20B)   | 0.9900   |
| C(21)-H(21A)   | 0.9800   |
| C(21)-H(21B)   | 0.9800   |
| C(21)-H(21C)   | 0.9800   |
| N(2)-C(22)     | 1.465(4) |
| N(2)-C(24)     | 1.466(4) |
| C(22)-C(23)    | 1.518(5) |
| C(22)-H(22A)   | 0.9900   |
| C(22)-H(22B)   | 0.9900   |
| C(23)-H(23A)   | 0.9800   |
| C(23)-H(23B)   | 0.9800   |
| C(23)-H(23C)   | 0.9800   |
| C(24)-C(25)    | 1.510(5) |
| C(24)-H(24A)   | 0.9900   |
| C(24)-H(24B)   | 0.9900   |
| C(25)-H(25A)   | 0.9800   |
| C(25)-H(25B)   | 0.9800   |
| C(25)-H(25C)   | 0.9800   |
| C(26)-N(3)     | 1.136(4) |
| O(1)-C(1)-C(2) | 123.2(3) |
| O(1)-C(1)-C(6) | 114.5(2) |
| C(2)-C(1)-C(6) | 122.3(3) |
| C(1)-C(2)-C(3) | 121.7(3) |
| C(1)-C(2)-H(2) | 119.2    |

|                   |           |
|-------------------|-----------|
| C(3)-C(2)-H(2)    | 119.2     |
| N(2)-C(3)-C(2)    | 121.8(3)  |
| N(2)-C(3)-C(4)    | 121.9(3)  |
| C(2)-C(3)-C(4)    | 116.3(3)  |
| C(5)-C(4)-C(3)    | 121.2(3)  |
| C(5)-C(4)-H(4)    | 119.4     |
| C(3)-C(4)-H(4)    | 119.4     |
| C(4)-C(5)-C(6)    | 123.5(3)  |
| C(4)-C(5)-H(5)    | 118.3     |
| C(6)-C(5)-H(5)    | 118.3     |
| C(5)-C(6)-C(7)    | 125.6(3)  |
| C(5)-C(6)-C(1)    | 115.1(3)  |
| C(7)-C(6)-C(1)    | 119.4(3)  |
| C(8)-C(7)-C(6)    | 131.9(3)  |
| C(8)-C(7)-H(7)    | 114.1     |
| C(6)-C(7)-H(7)    | 114.1     |
| C(7)-C(8)-C(26)   | 123.4(3)  |
| C(7)-C(8)-C(9)    | 122.7(3)  |
| C(26)-C(8)-C(9)   | 113.9(3)  |
| N(1)-C(9)-C(8)    | 121.9(3)  |
| N(1)-C(9)-S(1)    | 117.1(2)  |
| C(8)-C(9)-S(1)    | 121.0(2)  |
| C(9)-N(1)-C(15)   | 108.3(3)  |
| C(10)-S(1)-C(9)   | 88.54(15) |
| C(11)-C(10)-C(15) | 121.8(3)  |
| C(11)-C(10)-S(1)  | 128.3(3)  |
| C(15)-C(10)-S(1)  | 110.0(2)  |
| C(12)-C(11)-C(10) | 117.0(4)  |
| C(12)-C(11)-H(11) | 121.5     |
| C(10)-C(11)-H(11) | 121.5     |
| C(13)-C(12)-C(11) | 121.2(4)  |
| C(13)-C(12)-H(12) | 119.4     |
| C(11)-C(12)-H(12) | 119.4     |
| C(14)-C(13)-C(12) | 121.8(4)  |
| C(14)-C(13)-H(13) | 119.1     |
| C(12)-C(13)-H(13) | 119.1     |

|                     |          |
|---------------------|----------|
| C(13)-C(14)-C(15)   | 118.5(4) |
| C(13)-C(14)-H(14)   | 120.8    |
| C(15)-C(14)-H(14)   | 120.8    |
| N(1)-C(15)-C(10)    | 116.1(3) |
| N(1)-C(15)-C(14)    | 124.1(3) |
| C(10)-C(15)-C(14)   | 119.8(3) |
| C(1)-O(1)-C(16)     | 118.6(2) |
| O(1)-C(16)-C(17)    | 108.1(2) |
| O(1)-C(16)-H(16A)   | 110.1    |
| C(17)-C(16)-H(16A)  | 110.1    |
| O(1)-C(16)-H(16B)   | 110.1    |
| C(17)-C(16)-H(16B)  | 110.1    |
| H(16A)-C(16)-H(16B) | 108.4    |
| C(16)-C(17)-C(18)   | 111.2(2) |
| C(16)-C(17)-H(17A)  | 109.4    |
| C(18)-C(17)-H(17A)  | 109.4    |
| C(16)-C(17)-H(17B)  | 109.4    |
| C(18)-C(17)-H(17B)  | 109.4    |
| H(17A)-C(17)-H(17B) | 108.0    |
| C(17)-C(18)-C(19)   | 114.4(3) |
| C(17)-C(18)-H(18A)  | 108.6    |
| C(19)-C(18)-H(18A)  | 108.6    |
| C(17)-C(18)-H(18B)  | 108.6    |
| C(19)-C(18)-H(18B)  | 108.6    |
| H(18A)-C(18)-H(18B) | 107.6    |
| C(20)-C(19)-C(18)   | 112.4(3) |
| C(20)-C(19)-H(19A)  | 109.1    |
| C(18)-C(19)-H(19A)  | 109.1    |
| C(20)-C(19)-H(19B)  | 109.1    |
| C(18)-C(19)-H(19B)  | 109.1    |
| H(19A)-C(19)-H(19B) | 107.9    |
| C(19)-C(20)-C(21)   | 113.7(3) |
| C(19)-C(20)-H(20A)  | 108.8    |
| C(21)-C(20)-H(20A)  | 108.8    |
| C(19)-C(20)-H(20B)  | 108.8    |
| C(21)-C(20)-H(20B)  | 108.8    |

|                     |          |
|---------------------|----------|
| H(20A)-C(20)-H(20B) | 107.7    |
| C(20)-C(21)-H(21A)  | 109.5    |
| C(20)-C(21)-H(21B)  | 109.5    |
| H(21A)-C(21)-H(21B) | 109.5    |
| C(20)-C(21)-H(21C)  | 109.5    |
| H(21A)-C(21)-H(21C) | 109.5    |
| H(21B)-C(21)-H(21C) | 109.5    |
| C(3)-N(2)-C(22)     | 121.6(2) |
| C(3)-N(2)-C(24)     | 121.6(2) |
| C(22)-N(2)-C(24)    | 116.4(2) |
| N(2)-C(22)-C(23)    | 113.4(3) |
| N(2)-C(22)-H(22A)   | 108.9    |
| C(23)-C(22)-H(22A)  | 108.9    |
| N(2)-C(22)-H(22B)   | 108.9    |
| C(23)-C(22)-H(22B)  | 108.9    |
| H(22A)-C(22)-H(22B) | 107.7    |
| C(22)-C(23)-H(23A)  | 109.5    |
| C(22)-C(23)-H(23B)  | 109.5    |
| H(23A)-C(23)-H(23B) | 109.5    |
| C(22)-C(23)-H(23C)  | 109.5    |
| H(23A)-C(23)-H(23C) | 109.5    |
| H(23B)-C(23)-H(23C) | 109.5    |
| N(2)-C(24)-C(25)    | 113.5(3) |
| N(2)-C(24)-H(24A)   | 108.9    |
| C(25)-C(24)-H(24A)  | 108.9    |
| N(2)-C(24)-H(24B)   | 108.9    |
| C(25)-C(24)-H(24B)  | 108.9    |
| H(24A)-C(24)-H(24B) | 107.7    |
| C(24)-C(25)-H(25A)  | 109.5    |
| C(24)-C(25)-H(25B)  | 109.5    |
| H(25A)-C(25)-H(25B) | 109.5    |
| C(24)-C(25)-H(25C)  | 109.5    |
| H(25A)-C(25)-H(25C) | 109.5    |
| H(25B)-C(25)-H(25C) | 109.5    |
| N(3)-C(26)-C(8)     | 178.6(4) |

---

Symmetry transformations used to generate equivalent atoms:

**Table S15.** Anisotropic displacement parameters ( $\text{\AA}^2 \times 10^3$ ) for **CV6-R**. The anisotropic displacement factor exponent takes the form:  $-2\pi^2[h^2a^{*2}U^{11} + \dots + 2hka^*b^*U^{12}]$ .

|       | U <sup>11</sup> | U <sup>22</sup> | U <sup>33</sup> | U <sup>23</sup> | U <sup>13</sup> | U <sup>12</sup> |
|-------|-----------------|-----------------|-----------------|-----------------|-----------------|-----------------|
| C(1)  | 36(2)           | 33(2)           | 29(1)           | 0(1)            | 4(1)            | 2(1)            |
| C(2)  | 30(1)           | 34(2)           | 35(1)           | 0(1)            | 5(1)            | 4(1)            |
| C(3)  | 33(1)           | 30(1)           | 31(1)           | 2(1)            | 3(1)            | 2(1)            |
| C(4)  | 37(2)           | 39(2)           | 37(2)           | 4(1)            | 7(1)            | 6(1)            |
| C(5)  | 32(2)           | 37(2)           | 37(2)           | 0(1)            | 3(1)            | 5(1)            |
| C(6)  | 34(2)           | 32(2)           | 33(1)           | 1(1)            | 6(1)            | 4(1)            |
| C(7)  | 36(2)           | 33(2)           | 32(1)           | -3(1)           | 4(1)            | 2(1)            |
| C(8)  | 30(2)           | 35(2)           | 38(2)           | -3(1)           | 5(1)            | 2(1)            |
| C(9)  | 37(2)           | 36(2)           | 36(2)           | -7(1)           | 9(1)            | 4(1)            |
| N(1)  | 58(2)           | 39(2)           | 38(1)           | -5(1)           | 11(1)           | -8(1)           |
| S(1)  | 43(1)           | 44(1)           | 41(1)           | -1(1)           | 10(1)           | 0(1)            |
| C(10) | 41(2)           | 40(2)           | 40(2)           | -6(1)           | 12(1)           | -7(1)           |
| C(11) | 64(2)           | 49(2)           | 42(2)           | -3(2)           | 7(2)            | -13(2)          |
| C(12) | 87(3)           | 64(2)           | 44(2)           | -11(2)          | 29(2)           | -31(2)          |
| C(13) | 51(2)           | 78(3)           | 64(2)           | -23(2)          | 29(2)           | -23(2)          |
| C(14) | 40(2)           | 65(2)           | 62(2)           | -21(2)          | 17(2)           | -10(2)          |
| C(15) | 41(2)           | 45(2)           | 44(2)           | -8(1)           | 12(1)           | -6(1)           |
| O(1)  | 33(1)           | 43(1)           | 32(1)           | 6(1)            | 6(1)            | 6(1)            |
| C(16) | 31(2)           | 36(2)           | 36(2)           | 1(1)            | 5(1)            | 5(1)            |
| C(17) | 40(2)           | 39(2)           | 29(1)           | 1(1)            | 4(1)            | 0(1)            |
| C(18) | 36(2)           | 41(2)           | 31(1)           | 1(1)            | 5(1)            | 1(1)            |
| C(19) | 38(2)           | 44(2)           | 31(1)           | 5(1)            | 5(1)            | 1(1)            |
| C(20) | 48(2)           | 55(2)           | 39(2)           | 3(2)            | 0(2)            | 6(2)            |
| C(21) | 61(3)           | 67(3)           | 60(2)           | 15(2)           | -12(2)          | 8(2)            |
| N(2)  | 35(1)           | 41(1)           | 31(1)           | 4(1)            | 7(1)            | 3(1)            |
| C(22) | 43(2)           | 42(2)           | 35(2)           | 9(1)            | 6(1)            | 1(1)            |

|       |       |       |       |       |       |       |
|-------|-------|-------|-------|-------|-------|-------|
| C(23) | 62(2) | 53(2) | 41(2) | 0(2)  | -4(2) | 8(2)  |
| C(24) | 36(2) | 46(2) | 33(2) | -3(1) | 6(1)  | -3(1) |
| C(25) | 39(2) | 56(2) | 44(2) | -8(2) | 2(1)  | 5(2)  |
| C(26) | 33(2) | 44(2) | 51(2) | 6(2)  | 6(1)  | -2(1) |
| N(3)  | 35(2) | 80(2) | 73(2) | 33(2) | 5(2)  | 2(2)  |

---

**Table S16.** Hydrogen coordinates ( $\times 10^4$ ) and isotropic displacement parameters ( $\text{\AA}^2 \times 10^3$ ) for **CV6-R**.

|        | x     | y     | z     | U(eq) |
|--------|-------|-------|-------|-------|
| H(2)   | 7021  | 8460  | 8556  | 40    |
| H(4)   | 4649  | 11034 | 7656  | 45    |
| H(5)   | 3696  | 10510 | 8452  | 43    |
| H(7)   | 4568  | 8280  | 9856  | 40    |
| H(11)  | 2856  | 6016  | 11936 | 62    |
| H(12)  | 1274  | 6284  | 12348 | 76    |
| H(13)  | -60   | 7745  | 11824 | 75    |
| H(14)  | 98    | 8948  | 10872 | 66    |
| H(16A) | 7654  | 7958  | 9575  | 41    |
| H(16B) | 7211  | 6387  | 9231  | 41    |
| H(17A) | 6817  | 5418  | 10220 | 43    |
| H(17B) | 7300  | 6968  | 10558 | 43    |
| H(18A) | 8936  | 6313  | 10260 | 43    |
| H(18B) | 8454  | 4765  | 9926  | 43    |
| H(19A) | 8691  | 5325  | 11254 | 45    |
| H(19B) | 8130  | 3810  | 10935 | 45    |
| H(20A) | 10253 | 4550  | 10869 | 57    |
| H(20B) | 9687  | 3009  | 10580 | 57    |
| H(21A) | 10081 | 3672  | 11899 | 97    |
| H(21B) | 10693 | 2406  | 11540 | 97    |
| H(21C) | 9500  | 2137  | 11613 | 97    |
| H(22A) | 6696  | 11438 | 6772  | 48    |
| H(22B) | 5703  | 11899 | 7100  | 48    |
| H(23A) | 5859  | 9130  | 6377  | 79    |
| H(23B) | 5185  | 10626 | 6139  | 79    |
| H(23C) | 4865  | 9588  | 6706  | 79    |

|        |      |       |      |    |
|--------|------|-------|------|----|
| H(24A) | 7952 | 9594  | 7998 | 45 |
| H(24B) | 7987 | 10246 | 7300 | 45 |
| H(25A) | 7251 | 7221  | 7569 | 70 |
| H(25B) | 8357 | 7561  | 7347 | 70 |
| H(25C) | 7324 | 7874  | 6874 | 70 |

---



**Table S17.** Torsion angles [°] for **CV6-R**.

---

|                         |           |
|-------------------------|-----------|
| O(1)-C(1)-C(2)-C(3)     | -179.2(3) |
| C(6)-C(1)-C(2)-C(3)     | 1.9(5)    |
| C(1)-C(2)-C(3)-N(2)     | 177.0(3)  |
| C(1)-C(2)-C(3)-C(4)     | -1.3(4)   |
| N(2)-C(3)-C(4)-C(5)     | -177.9(3) |
| C(2)-C(3)-C(4)-C(5)     | 0.4(4)    |
| C(3)-C(4)-C(5)-C(6)     | -0.1(5)   |
| C(4)-C(5)-C(6)-C(7)     | -178.4(3) |
| C(4)-C(5)-C(6)-C(1)     | 0.5(4)    |
| O(1)-C(1)-C(6)-C(5)     | 179.6(2)  |
| C(2)-C(1)-C(6)-C(5)     | -1.5(4)   |
| O(1)-C(1)-C(6)-C(7)     | -1.4(4)   |
| C(2)-C(1)-C(6)-C(7)     | 177.6(3)  |
| C(5)-C(6)-C(7)-C(8)     | 8.1(5)    |
| C(1)-C(6)-C(7)-C(8)     | -170.8(3) |
| C(6)-C(7)-C(8)-C(26)    | 1.0(5)    |
| C(6)-C(7)-C(8)-C(9)     | -179.7(3) |
| C(7)-C(8)-C(9)-N(1)     | 171.8(3)  |
| C(26)-C(8)-C(9)-N(1)    | -8.8(4)   |
| C(7)-C(8)-C(9)-S(1)     | -9.5(4)   |
| C(26)-C(8)-C(9)-S(1)    | 169.9(2)  |
| C(8)-C(9)-N(1)-C(15)    | 178.9(3)  |
| S(1)-C(9)-N(1)-C(15)    | 0.2(3)    |
| N(1)-C(9)-S(1)-C(10)    | 0.0(3)    |
| C(8)-C(9)-S(1)-C(10)    | -178.8(3) |
| C(9)-S(1)-C(10)-C(11)   | 180.0(3)  |
| C(9)-S(1)-C(10)-C(15)   | -0.2(2)   |
| C(15)-C(10)-C(11)-C(12) | 0.5(5)    |
| S(1)-C(10)-C(11)-C(12)  | -179.6(3) |
| C(10)-C(11)-C(12)-C(13) | -0.6(5)   |
| C(11)-C(12)-C(13)-C(14) | 0.6(6)    |
| C(12)-C(13)-C(14)-C(15) | -0.4(6)   |
| C(9)-N(1)-C(15)-C(10)   | -0.3(4)   |
| C(9)-N(1)-C(15)-C(14)   | -179.7(3) |

|                         |           |
|-------------------------|-----------|
| C(11)-C(10)-C(15)-N(1)  | -179.8(3) |
| S(1)-C(10)-C(15)-N(1)   | 0.3(4)    |
| C(11)-C(10)-C(15)-C(14) | -0.4(5)   |
| S(1)-C(10)-C(15)-C(14)  | 179.7(3)  |
| C(13)-C(14)-C(15)-N(1)  | 179.7(3)  |
| C(13)-C(14)-C(15)-C(10) | 0.3(5)    |
| C(2)-C(1)-O(1)-C(16)    | 1.2(4)    |
| C(6)-C(1)-O(1)-C(16)    | -179.8(2) |
| C(1)-O(1)-C(16)-C(17)   | 178.3(2)  |
| O(1)-C(16)-C(17)-C(18)  | 177.9(2)  |
| C(16)-C(17)-C(18)-C(19) | 179.8(3)  |
| C(17)-C(18)-C(19)-C(20) | 175.9(3)  |
| C(18)-C(19)-C(20)-C(21) | 177.5(3)  |
| C(2)-C(3)-N(2)-C(22)    | 174.3(3)  |
| C(4)-C(3)-N(2)-C(22)    | -7.4(4)   |
| C(2)-C(3)-N(2)-C(24)    | 2.0(4)    |
| C(4)-C(3)-N(2)-C(24)    | -179.8(3) |
| C(3)-N(2)-C(22)-C(23)   | -76.5(4)  |
| C(24)-N(2)-C(22)-C(23)  | 96.3(3)   |
| C(3)-N(2)-C(24)-C(25)   | 81.2(3)   |
| C(22)-N(2)-C(24)-C(25)  | -91.5(3)  |
| C(7)-C(8)-C(26)-N(3)    | 111(16)   |
| C(9)-C(8)-C(26)-N(3)    | -69(16)   |

---

Symmetry transformations used to generate equivalent atoms:

**Table S18.** Crystal data and structure refinement for **CV8-Y**.

|                                   |                                                           |
|-----------------------------------|-----------------------------------------------------------|
| Identification code               | <b>CV8-Y</b>                                              |
| Empirical formula                 | $C_{28}H_{35}N_3OS$                                       |
| Formula weight                    | 461.65                                                    |
| Temperature                       | 200(2) K                                                  |
| Wavelength                        | 0.71073 Å                                                 |
| Crystal system                    | Monoclinic                                                |
| Space group                       | P2(1)/n                                                   |
| Unit cell dimensions              | a = 12.5302(15) Å<br>b = 10.9923(14) Å<br>c = 19.127(2) Å |
| Volume                            | 2547.0(5) Å <sup>3</sup>                                  |
| Z                                 | 4                                                         |
| Density (calculated)              | 1.204 Mg/m <sup>3</sup>                                   |
| Absorption coefficient            | 0.152 mm <sup>-1</sup>                                    |
| F(000)                            | 992                                                       |
| Crystal size                      | 0.44 x 0.38 x 0.34 mm <sup>3</sup>                        |
| Theta range for data collection   | 2.16 to 28.35°.                                           |
| Index ranges                      | -12 ≤ h ≤ 16, -14 ≤ k ≤ 14, -23 ≤ l ≤ 25                  |
| Reflections collected             | 18372                                                     |
| Independent reflections           | 6361 [R(int) = 0.0634]                                    |
| Completeness to theta = 28.35°    | 99.7 %                                                    |
| Absorption correction             | None                                                      |
| Refinement method                 | Full-matrix least-squares on F <sup>2</sup>               |
| Data / restraints / parameters    | 6361 / 0 / 301                                            |
| Goodness-of-fit on F <sup>2</sup> | 1.221                                                     |
| Final R indices [I > 2σ(I)]       | R1 = 0.0559, wR2 = 0.1502                                 |
| R indices (all data)              | R1 = 0.1068, wR2 = 0.2172                                 |
| Largest diff. peak and hole       | 0.438 and -0.561 e.Å <sup>-3</sup>                        |

**Table S19.** Atomic coordinates ( $\times 10^4$ ) and equivalent isotropic displacement parameters ( $\text{\AA}^2 \times 10^3$ ) for CV8-Y.  $U(\text{eq})$  is defined as one third of the trace of the orthogonalized  $U^{ij}$  tensor.

|       | x        | y        | z       | $U(\text{eq})$ |
|-------|----------|----------|---------|----------------|
| C(1)  | 6108(2)  | 2294(2)  | 1445(1) | 36(1)          |
| C(2)  | 5477(2)  | 1253(2)  | 1378(1) | 37(1)          |
| C(3)  | 5961(2)  | 94(2)    | 1457(1) | 38(1)          |
| C(4)  | 7121(2)  | 40(2)    | 1617(2) | 45(1)          |
| C(5)  | 7740(2)  | 1085(2)  | 1684(2) | 42(1)          |
| C(6)  | 7277(2)  | 2258(2)  | 1598(1) | 36(1)          |
| O(1)  | 5644(1)  | 3434(2)  | 1355(1) | 44(1)          |
| C(7)  | 4466(2)  | 3517(2)  | 1188(1) | 39(1)          |
| C(8)  | 4124(2)  | 4822(2)  | 1020(2) | 45(1)          |
| C(9)  | 2880(2)  | 4911(2)  | 743(2)  | 46(1)          |
| C(10) | 2437(2)  | 6168(2)  | 506(2)  | 44(1)          |
| C(11) | 1188(2)  | 6194(2)  | 205(2)  | 44(1)          |
| C(12) | 687(2)   | 7451(2)  | 7(2)    | 47(1)          |
| C(13) | -555(2)  | 7407(3)  | -279(2) | 54(1)          |
| C(14) | -1099(3) | 8633(3)  | -447(2) | 81(1)          |
| N(1)  | 5328(2)  | -938(2)  | 1386(1) | 40(1)          |
| C(15) | 5820(2)  | -2150(2) | 1392(2) | 43(1)          |
| C(16) | 6025(2)  | -2528(3) | 679(2)  | 54(1)          |
| C(17) | 4131(2)  | -872(2)  | 1189(2) | 43(1)          |
| C(18) | 3610(2)  | -664(3)  | 392(2)  | 53(1)          |
| C(19) | 7887(2)  | 3378(2)  | 1643(1) | 37(1)          |
| C(20) | 8992(2)  | 3606(2)  | 1818(1) | 35(1)          |
| C(21) | 9813(2)  | 2670(2)  | 2022(1) | 39(1)          |
| N(2)  | 10458(2) | 1914(2)  | 2191(1) | 54(1)          |
| C(22) | 9474(2)  | 4821(2)  | 1853(1) | 34(1)          |
| N(3)  | 10523(2) | 5029(2)  | 2072(1) | 35(1)          |

|       |          |         |         |       |
|-------|----------|---------|---------|-------|
| S(1)  | 8640(1)  | 6124(1) | 1601(1) | 44(1) |
| C(23) | 10748(2) | 6261(2) | 2066(1) | 36(1) |
| C(24) | 9815(2)  | 7014(2) | 1822(1) | 38(1) |
| C(25) | 9935(2)  | 8272(2) | 1788(2) | 49(1) |
| C(26) | 10975(2) | 8772(2) | 2008(2) | 47(1) |
| C(27) | 11897(2) | 8035(2) | 2258(2) | 45(1) |
| C(28) | 11793(2) | 6794(2) | 2288(2) | 42(1) |

---

**Table S20.** Bond lengths [Å] and angles [°] for **CV8-Y**.

---

|              |          |
|--------------|----------|
| C(1)-O(1)    | 1.374(3) |
| C(1)-C(2)    | 1.378(3) |
| C(1)-C(6)    | 1.419(3) |
| C(2)-C(3)    | 1.403(3) |
| C(2)-H(2)    | 0.9500   |
| C(3)-N(1)    | 1.371(3) |
| C(3)-C(4)    | 1.408(4) |
| C(4)-C(5)    | 1.374(3) |
| C(4)-H(4)    | 0.9500   |
| C(5)-C(6)    | 1.406(3) |
| C(5)-H(5)    | 0.9500   |
| C(6)-C(19)   | 1.441(3) |
| O(1)-C(7)    | 1.431(3) |
| C(7)-C(8)    | 1.509(3) |
| C(7)-H(7A)   | 0.9900   |
| C(7)-H(7B)   | 0.9900   |
| C(8)-C(9)    | 1.516(3) |
| C(8)-H(8A)   | 0.9900   |
| C(8)-H(8B)   | 0.9900   |
| C(9)-C(10)   | 1.515(3) |
| C(9)-H(9A)   | 0.9900   |
| C(9)-H(9B)   | 0.9900   |
| C(10)-C(11)  | 1.524(3) |
| C(10)-H(10A) | 0.9900   |
| C(10)-H(10B) | 0.9900   |
| C(11)-C(12)  | 1.525(4) |
| C(11)-H(11A) | 0.9900   |
| C(11)-H(11B) | 0.9900   |
| C(12)-C(13)  | 1.512(4) |
| C(12)-H(12A) | 0.9900   |
| C(12)-H(12B) | 0.9900   |
| C(13)-C(14)  | 1.507(4) |
| C(13)-H(13A) | 0.9900   |
| C(13)-H(13B) | 0.9900   |

|              |          |
|--------------|----------|
| C(14)-H(14A) | 0.9800   |
| C(14)-H(14B) | 0.9800   |
| C(14)-H(14C) | 0.9800   |
| N(1)-C(17)   | 1.452(3) |
| N(1)-C(15)   | 1.467(3) |
| C(15)-C(16)  | 1.509(4) |
| C(15)-H(15A) | 0.9900   |
| C(15)-H(15B) | 0.9900   |
| C(16)-H(16A) | 0.9800   |
| C(16)-H(16B) | 0.9800   |
| C(16)-H(16C) | 0.9800   |
| C(17)-C(18)  | 1.514(4) |
| C(17)-H(17A) | 0.9900   |
| C(17)-H(17B) | 0.9900   |
| C(18)-H(18A) | 0.9800   |
| C(18)-H(18B) | 0.9800   |
| C(18)-H(18C) | 0.9800   |
| C(19)-C(20)  | 1.362(3) |
| C(19)-H(19)  | 0.9500   |
| C(20)-C(21)  | 1.437(3) |
| C(20)-C(22)  | 1.461(3) |
| C(21)-N(2)   | 1.147(3) |
| C(22)-N(3)   | 1.293(3) |
| C(22)-S(1)   | 1.765(2) |
| N(3)-C(23)   | 1.385(3) |
| S(1)-C(24)   | 1.728(3) |
| C(23)-C(28)  | 1.397(3) |
| C(23)-C(24)  | 1.411(3) |
| C(24)-C(25)  | 1.394(4) |
| C(25)-C(26)  | 1.377(4) |
| C(25)-H(25)  | 0.9500   |
| C(26)-C(27)  | 1.392(4) |
| C(26)-H(26)  | 0.9500   |
| C(27)-C(28)  | 1.373(4) |
| C(27)-H(27)  | 0.9500   |
| C(28)-H(28)  | 0.9500   |

|                  |            |
|------------------|------------|
| O(1)-C(1)-C(2)   | 122.1(2)   |
| O(1)-C(1)-C(6)   | 115.6(2)   |
| C(2)-C(1)-C(6)   | 122.2(2)   |
| C(1)-C(2)-C(3)   | 121.5(2)   |
| C(1)-C(2)-H(2)   | 119.3      |
| C(3)-C(2)-H(2)   | 119.3      |
| N(1)-C(3)-C(2)   | 121.1(2)   |
| N(1)-C(3)-C(4)   | 121.8(2)   |
| C(2)-C(3)-C(4)   | 117.1(2)   |
| C(5)-C(4)-C(3)   | 120.8(2)   |
| C(5)-C(4)-H(4)   | 119.6      |
| C(3)-C(4)-H(4)   | 119.6      |
| C(4)-C(5)-C(6)   | 123.3(2)   |
| C(4)-C(5)-H(5)   | 118.4      |
| C(6)-C(5)-H(5)   | 118.4      |
| C(5)-C(6)-C(1)   | 115.1(2)   |
| C(5)-C(6)-C(19)  | 125.4(2)   |
| C(1)-C(6)-C(19)  | 119.5(2)   |
| C(1)-O(1)-C(7)   | 117.73(19) |
| O(1)-C(7)-C(8)   | 109.2(2)   |
| O(1)-C(7)-H(7A)  | 109.8      |
| C(8)-C(7)-H(7A)  | 109.8      |
| O(1)-C(7)-H(7B)  | 109.8      |
| C(8)-C(7)-H(7B)  | 109.8      |
| H(7A)-C(7)-H(7B) | 108.3      |
| C(7)-C(8)-C(9)   | 110.3(2)   |
| C(7)-C(8)-H(8A)  | 109.6      |
| C(9)-C(8)-H(8A)  | 109.6      |
| C(7)-C(8)-H(8B)  | 109.6      |
| C(9)-C(8)-H(8B)  | 109.6      |
| H(8A)-C(8)-H(8B) | 108.1      |
| C(10)-C(9)-C(8)  | 115.3(2)   |
| C(10)-C(9)-H(9A) | 108.4      |
| C(8)-C(9)-H(9A)  | 108.4      |
| C(10)-C(9)-H(9B) | 108.4      |



|                     |          |
|---------------------|----------|
| C(8)-C(9)-H(9B)     | 108.4    |
| H(9A)-C(9)-H(9B)    | 107.5    |
| C(9)-C(10)-C(11)    | 113.1(2) |
| C(9)-C(10)-H(10A)   | 109.0    |
| C(11)-C(10)-H(10A)  | 109.0    |
| C(9)-C(10)-H(10B)   | 109.0    |
| C(11)-C(10)-H(10B)  | 109.0    |
| H(10A)-C(10)-H(10B) | 107.8    |
| C(10)-C(11)-C(12)   | 115.4(2) |
| C(10)-C(11)-H(11A)  | 108.4    |
| C(12)-C(11)-H(11A)  | 108.4    |
| C(10)-C(11)-H(11B)  | 108.4    |
| C(12)-C(11)-H(11B)  | 108.4    |
| H(11A)-C(11)-H(11B) | 107.5    |
| C(13)-C(12)-C(11)   | 112.4(2) |
| C(13)-C(12)-H(12A)  | 109.1    |
| C(11)-C(12)-H(12A)  | 109.1    |
| C(13)-C(12)-H(12B)  | 109.1    |
| C(11)-C(12)-H(12B)  | 109.1    |
| H(12A)-C(12)-H(12B) | 107.9    |
| C(14)-C(13)-C(12)   | 114.6(3) |
| C(14)-C(13)-H(13A)  | 108.6    |
| C(12)-C(13)-H(13A)  | 108.6    |
| C(14)-C(13)-H(13B)  | 108.6    |
| C(12)-C(13)-H(13B)  | 108.6    |
| H(13A)-C(13)-H(13B) | 107.6    |
| C(13)-C(14)-H(14A)  | 109.5    |
| C(13)-C(14)-H(14B)  | 109.5    |
| H(14A)-C(14)-H(14B) | 109.5    |
| C(13)-C(14)-H(14C)  | 109.5    |
| H(14A)-C(14)-H(14C) | 109.5    |
| H(14B)-C(14)-H(14C) | 109.5    |
| C(3)-N(1)-C(17)     | 121.2(2) |
| C(3)-N(1)-C(15)     | 121.2(2) |
| C(17)-N(1)-C(15)    | 116.9(2) |
| N(1)-C(15)-C(16)    | 114.3(2) |

|                     |            |
|---------------------|------------|
| N(1)-C(15)-H(15A)   | 108.7      |
| C(16)-C(15)-H(15A)  | 108.7      |
| N(1)-C(15)-H(15B)   | 108.7      |
| C(16)-C(15)-H(15B)  | 108.7      |
| H(15A)-C(15)-H(15B) | 107.6      |
| C(15)-C(16)-H(16A)  | 109.5      |
| C(15)-C(16)-H(16B)  | 109.5      |
| H(16A)-C(16)-H(16B) | 109.5      |
| C(15)-C(16)-H(16C)  | 109.5      |
| H(16A)-C(16)-H(16C) | 109.5      |
| H(16B)-C(16)-H(16C) | 109.5      |
| N(1)-C(17)-C(18)    | 114.8(2)   |
| N(1)-C(17)-H(17A)   | 108.6      |
| C(18)-C(17)-H(17A)  | 108.6      |
| N(1)-C(17)-H(17B)   | 108.6      |
| C(18)-C(17)-H(17B)  | 108.6      |
| H(17A)-C(17)-H(17B) | 107.5      |
| C(17)-C(18)-H(18A)  | 109.5      |
| C(17)-C(18)-H(18B)  | 109.5      |
| H(18A)-C(18)-H(18B) | 109.5      |
| C(17)-C(18)-H(18C)  | 109.5      |
| H(18A)-C(18)-H(18C) | 109.5      |
| H(18B)-C(18)-H(18C) | 109.5      |
| C(20)-C(19)-C(6)    | 131.5(2)   |
| C(20)-C(19)-H(19)   | 114.2      |
| C(6)-C(19)-H(19)    | 114.2      |
| C(19)-C(20)-C(21)   | 123.2(2)   |
| C(19)-C(20)-C(22)   | 124.2(2)   |
| C(21)-C(20)-C(22)   | 112.5(2)   |
| N(2)-C(21)-C(20)    | 178.9(3)   |
| N(3)-C(22)-C(20)    | 123.4(2)   |
| N(3)-C(22)-S(1)     | 115.28(18) |
| C(20)-C(22)-S(1)    | 121.33(17) |
| C(22)-N(3)-C(23)    | 111.2(2)   |
| C(24)-S(1)-C(22)    | 89.13(11)  |
| N(3)-C(23)-C(28)    | 125.8(2)   |

|                   |            |
|-------------------|------------|
| N(3)-C(23)-C(24)  | 115.0(2)   |
| C(28)-C(23)-C(24) | 119.2(2)   |
| C(25)-C(24)-C(23) | 120.5(2)   |
| C(25)-C(24)-S(1)  | 130.2(2)   |
| C(23)-C(24)-S(1)  | 109.32(18) |
| C(26)-C(25)-C(24) | 119.1(2)   |
| C(26)-C(25)-H(25) | 120.4      |
| C(24)-C(25)-H(25) | 120.4      |
| C(25)-C(26)-C(27) | 120.7(2)   |
| C(25)-C(26)-H(26) | 119.7      |
| C(27)-C(26)-H(26) | 119.7      |
| C(28)-C(27)-C(26) | 120.9(2)   |
| C(28)-C(27)-H(27) | 119.6      |
| C(26)-C(27)-H(27) | 119.6      |
| C(27)-C(28)-C(26) | 119.7(2)   |
| C(27)-C(28)-H(28) | 120.2      |
| C(23)-C(28)-H(28) | 120.2      |

---

Symmetry transformations used to generate equivalent atoms:

**Table S21.** Anisotropic displacement parameters ( $\text{\AA}^2 \times 10^3$ ) for **CV8-Y**. The anisotropic displacement factor exponent takes the form:  $-2\pi^2[h^2a^{*2}U^{11} + \dots + 2hka^*b^*U^{12}]$ .

|       | U <sup>11</sup> | U <sup>22</sup> | U <sup>33</sup> | U <sup>23</sup> | U <sup>13</sup> | U <sup>12</sup> |
|-------|-----------------|-----------------|-----------------|-----------------|-----------------|-----------------|
| C(1)  | 35(1)           | 32(1)           | 42(1)           | -2(1)           | 8(1)            | 1(1)            |
| C(2)  | 32(1)           | 39(1)           | 40(1)           | -2(1)           | 9(1)            | -2(1)           |
| C(3)  | 38(1)           | 39(1)           | 35(1)           | -4(1)           | 8(1)            | -7(1)           |
| C(4)  | 36(1)           | 36(1)           | 61(2)           | -2(1)           | 8(1)            | 0(1)            |
| C(5)  | 24(1)           | 41(1)           | 59(2)           | 0(1)            | 4(1)            | -2(1)           |
| C(6)  | 29(1)           | 38(1)           | 43(1)           | -3(1)           | 9(1)            | -3(1)           |
| O(1)  | 30(1)           | 34(1)           | 67(1)           | -3(1)           | 8(1)            | 1(1)            |
| C(7)  | 25(1)           | 40(1)           | 51(2)           | -5(1)           | 8(1)            | -2(1)           |
| C(8)  | 37(2)           | 39(1)           | 59(2)           | -2(1)           | 10(1)           | 0(1)            |
| C(9)  | 38(2)           | 39(1)           | 59(2)           | -4(1)           | 10(1)           | -1(1)           |
| C(10) | 38(2)           | 39(1)           | 55(2)           | -1(1)           | 9(1)            | 0(1)            |
| C(11) | 40(2)           | 42(2)           | 48(2)           | -3(1)           | 7(1)            | 1(1)            |
| C(12) | 42(2)           | 44(2)           | 54(2)           | -1(1)           | 9(1)            | 0(1)            |
| C(13) | 43(2)           | 60(2)           | 57(2)           | 7(2)            | 9(1)            | 6(1)            |
| C(14) | 64(2)           | 71(2)           | 98(3)           | 6(2)            | 3(2)            | 27(2)           |
| N(1)  | 40(1)           | 35(1)           | 46(1)           | -1(1)           | 9(1)            | -7(1)           |
| C(15) | 46(2)           | 36(1)           | 48(2)           | 2(1)            | 12(1)           | -3(1)           |
| C(16) | 55(2)           | 56(2)           | 50(2)           | -4(1)           | 7(1)            | 12(1)           |
| C(17) | 37(1)           | 38(1)           | 53(2)           | -3(1)           | 11(1)           | -9(1)           |
| C(18) | 44(2)           | 53(2)           | 56(2)           | -3(1)           | 3(1)            | 0(1)            |
| C(19) | 32(1)           | 40(1)           | 37(1)           | -2(1)           | 6(1)            | -1(1)           |
| C(20) | 30(1)           | 35(1)           | 39(1)           | -2(1)           | 8(1)            | 0(1)            |
| C(21) | 36(1)           | 34(1)           | 47(2)           | -2(1)           | 9(1)            | -8(1)           |
| N(2)  | 40(1)           | 39(1)           | 81(2)           | 1(1)            | 13(1)           | 1(1)            |
| C(22) | 26(1)           | 40(1)           | 37(1)           | -2(1)           | 8(1)            | -1(1)           |
| N(3)  | 32(1)           | 31(1)           | 43(1)           | 1(1)            | 9(1)            | -1(1)           |

|       |       |       |       |       |       |       |
|-------|-------|-------|-------|-------|-------|-------|
| S(1)  | 32(1) | 38(1) | 58(1) | 4(1)  | 5(1)  | 2(1)  |
| C(23) | 34(1) | 35(1) | 40(1) | 0(1)  | 11(1) | -1(1) |
| C(24) | 33(1) | 36(1) | 46(2) | 3(1)  | 10(1) | 4(1)  |
| C(25) | 47(2) | 39(1) | 61(2) | 4(1)  | 14(1) | 6(1)  |
| C(26) | 45(2) | 36(1) | 62(2) | 0(1)  | 17(1) | -4(1) |
| C(27) | 44(2) | 41(1) | 52(2) | -6(1) | 17(1) | -9(1) |
| C(28) | 31(1) | 42(1) | 56(2) | 1(1)  | 14(1) | -1(1) |

---

**Table S22.** Hydrogen coordinates ( $\times 10^4$ ) and isotropic displacement parameters ( $\text{\AA}^2 \times 10^3$ ) for **CV8-Y**.

|        | x     | y     | z    | U(eq) |
|--------|-------|-------|------|-------|
| H(2)   | 4696  | 1321  | 1277 | 44    |
| H(4)   | 7480  | -728  | 1679 | 54    |
| H(5)   | 8521  | 1012  | 1795 | 51    |
| H(7A)  | 4201  | 3230  | 1604 | 47    |
| H(7B)  | 4134  | 2996  | 766  | 47    |
| H(8A)  | 4477  | 5143  | 650  | 54    |
| H(8B)  | 4374  | 5322  | 1462 | 54    |
| H(9A)  | 2638  | 4348  | 328  | 55    |
| H(9B)  | 2542  | 4628  | 1129 | 55    |
| H(10A) | 2789  | 6468  | 130  | 53    |
| H(10B) | 2644  | 6728  | 924  | 53    |
| H(11A) | 845   | 5829  | 568  | 53    |
| H(11B) | 992   | 5675  | -232 | 53    |
| H(12A) | 877   | 7979  | 441  | 56    |
| H(12B) | 1013  | 7818  | -363 | 56    |
| H(13A) | -737  | 6909  | -725 | 64    |
| H(13B) | -870  | 6993  | 82   | 64    |
| H(14A) | -981  | 9109  | 0    | 121   |
| H(14B) | -1893 | 8522  | -655 | 121   |
| H(14C) | -778  | 9063  | -793 | 121   |
| H(15A) | 5325  | -2754 | 1530 | 52    |
| H(15B) | 6530  | -2166 | 1767 | 52    |
| H(16A) | 5334  | -2479 | 298  | 82    |
| H(16B) | 6301  | -3365 | 715  | 82    |
| H(16C) | 6573  | -1984 | 560  | 82    |
| H(17A) | 3902  | -204  | 1466 | 51    |

|        |       |       |      |    |
|--------|-------|-------|------|----|
| H(17B) | 3837  | -1640 | 1336 | 51 |
| H(18A) | 3906  | 85    | 237  | 79 |
| H(18B) | 2808  | -589  | 311  | 79 |
| H(18C) | 3779  | -1353 | 114  | 79 |
| H(19)  | 7438  | 4084  | 1532 | 44 |
| H(25)  | 9308  | 8777  | 1615 | 58 |
| H(26)  | 11063 | 9629  | 1990 | 57 |
| H(27)  | 12608 | 8396  | 2410 | 54 |
| H(28)  | 12428 | 6299  | 2458 | 51 |

---

**Table S23.** Torsion angles [°] for CV8-Y.

---

|                         |           |
|-------------------------|-----------|
| O(1)-C(1)-C(2)-C(3)     | 178.6(2)  |
| C(6)-C(1)-C(2)-C(3)     | -0.2(4)   |
| C(1)-C(2)-C(3)-N(1)     | -179.6(2) |
| C(1)-C(2)-C(3)-C(4)     | 0.9(4)    |
| N(1)-C(3)-C(4)-C(5)     | 179.9(2)  |
| C(2)-C(3)-C(4)-C(5)     | -0.7(4)   |
| C(3)-C(4)-C(5)-C(6)     | -0.3(4)   |
| C(4)-C(5)-C(6)-C(1)     | 1.0(4)    |
| C(4)-C(5)-C(6)-C(19)    | -178.2(3) |
| O(1)-C(1)-C(6)-C(5)     | -179.6(2) |
| C(2)-C(1)-C(6)-C(5)     | -0.7(4)   |
| O(1)-C(1)-C(6)-C(19)    | -0.3(3)   |
| C(2)-C(1)-C(6)-C(19)    | 178.5(2)  |
| C(2)-C(1)-O(1)-C(7)     | 0.1(3)    |
| C(6)-C(1)-O(1)-C(7)     | 179.0(2)  |
| C(1)-O(1)-C(7)-C(8)     | -173.0(2) |
| O(1)-C(7)-C(8)-C(9)     | 172.3(2)  |
| C(7)-C(8)-C(9)-C(10)    | -176.0(2) |
| C(8)-C(9)-C(10)-C(11)   | 177.7(2)  |
| C(9)-C(10)-C(11)-C(12)  | 175.8(2)  |
| C(10)-C(11)-C(12)-C(13) | -179.4(2) |
| C(11)-C(12)-C(13)-C(14) | 176.9(3)  |
| C(2)-C(3)-N(1)-C(17)    | 3.4(4)    |
| C(4)-C(3)-N(1)-C(17)    | -177.2(2) |
| C(2)-C(3)-N(1)-C(15)    | 173.5(2)  |
| C(4)-C(3)-N(1)-C(15)    | -7.1(4)   |
| C(3)-N(1)-C(15)-C(16)   | -80.8(3)  |
| C(17)-N(1)-C(15)-C(16)  | 89.7(3)   |
| C(3)-N(1)-C(17)-C(18)   | 78.6(3)   |
| C(15)-N(1)-C(17)-C(18)  | -91.9(3)  |
| C(5)-C(6)-C(19)-C(20)   | -4.9(5)   |
| C(1)-C(6)-C(19)-C(20)   | 175.9(2)  |
| C(6)-C(19)-C(20)-C(21)  | -1.6(4)   |
| C(6)-C(19)-C(20)-C(22)  | -178.6(2) |



|                         |            |
|-------------------------|------------|
| C(19)-C(20)-C(21)-N(2)  | -42(17)    |
| C(22)-C(20)-C(21)-N(2)  | 135(17)    |
| C(19)-C(20)-C(22)-N(3)  | 174.5(2)   |
| C(21)-C(20)-C(22)-N(3)  | -2.7(3)    |
| C(19)-C(20)-C(22)-S(1)  | -4.8(3)    |
| C(21)-C(20)-C(22)-S(1)  | 177.97(17) |
| C(20)-C(22)-N(3)-C(23)  | -178.6(2)  |
| S(1)-C(22)-N(3)-C(23)   | 0.8(3)     |
| N(3)-C(22)-S(1)-C(24)   | -0.6(2)    |
| C(20)-C(22)-S(1)-C(24)  | 178.8(2)   |
| C(22)-N(3)-C(23)-C(28)  | 178.4(2)   |
| C(22)-N(3)-C(23)-C(24)  | -0.6(3)    |
| N(3)-C(23)-C(24)-C(25)  | -179.7(2)  |
| C(28)-C(23)-C(24)-C(25) | 1.3(4)     |
| N(3)-C(23)-C(24)-S(1)   | 0.1(3)     |
| C(28)-C(23)-C(24)-S(1)  | -178.9(2)  |
| C(22)-S(1)-C(24)-C(25)  | -180.0(3)  |
| C(22)-S(1)-C(24)-C(23)  | 0.25(19)   |
| C(23)-C(24)-C(25)-C(26) | -1.2(4)    |
| S(1)-C(24)-C(25)-C(26)  | 179.0(2)   |
| C(24)-C(25)-C(26)-C(27) | 0.5(4)     |
| C(25)-C(26)-C(27)-C(28) | 0.2(4)     |
| C(26)-C(27)-C(28)-C(23) | -0.2(4)    |
| N(3)-C(23)-C(28)-C(27)  | -179.5(2)  |
| C(24)-C(23)-C(28)-C(27) | -0.6(4)    |
| O(1)-C(1)-C(2)-C(3)     | 178.6(2)   |
| C(6)-C(1)-C(2)-C(3)     | -0.2(4)    |
| C(1)-C(2)-C(3)-N(1)     | -179.6(2)  |
| C(1)-C(2)-C(3)-C(4)     | 0.9(4)     |
| N(1)-C(3)-C(4)-C(5)     | 179.9(2)   |
| C(2)-C(3)-C(4)-C(5)     | -0.7(4)    |
| C(3)-C(4)-C(5)-C(6)     | -0.3(4)    |
| C(4)-C(5)-C(6)-C(1)     | 1.0(4)     |
| C(4)-C(5)-C(6)-C(19)    | -178.2(3)  |
| O(1)-C(1)-C(6)-C(5)     | -179.6(2)  |
| C(2)-C(1)-C(6)-C(5)     | -0.7(4)    |

|                         |            |
|-------------------------|------------|
| O(1)-C(1)-C(6)-C(19)    | -0.3(3)    |
| C(2)-C(1)-C(6)-C(19)    | 178.5(2)   |
| C(2)-C(1)-O(1)-C(7)     | 0.1(3)     |
| C(6)-C(1)-O(1)-C(7)     | 179.0(2)   |
| C(1)-O(1)-C(7)-C(8)     | -173.0(2)  |
| O(1)-C(7)-C(8)-C(9)     | 172.3(2)   |
| C(7)-C(8)-C(9)-C(10)    | -176.0(2)  |
| C(8)-C(9)-C(10)-C(11)   | 177.7(2)   |
| C(9)-C(10)-C(11)-C(12)  | 175.8(2)   |
| C(10)-C(11)-C(12)-C(13) | -179.4(2)  |
| C(11)-C(12)-C(13)-C(14) | 176.9(3)   |
| C(2)-C(3)-N(1)-C(17)    | 3.4(4)     |
| C(4)-C(3)-N(1)-C(17)    | -177.2(2)  |
| C(2)-C(3)-N(1)-C(15)    | 173.5(2)   |
| C(4)-C(3)-N(1)-C(15)    | -7.1(4)    |
| C(3)-N(1)-C(15)-C(16)   | -80.8(3)   |
| C(17)-N(1)-C(15)-C(16)  | 89.7(3)    |
| C(3)-N(1)-C(17)-C(18)   | 78.6(3)    |
| C(15)-N(1)-C(17)-C(18)  | -91.9(3)   |
| C(5)-C(6)-C(19)-C(20)   | -4.9(5)    |
| C(1)-C(6)-C(19)-C(20)   | 175.9(2)   |
| C(6)-C(19)-C(20)-C(21)  | -1.6(4)    |
| C(6)-C(19)-C(20)-C(22)  | -178.6(2)  |
| C(19)-C(20)-C(21)-N(2)  | -42(17)    |
| C(22)-C(20)-C(21)-N(2)  | 135(17)    |
| C(19)-C(20)-C(22)-N(3)  | 174.5(2)   |
| C(21)-C(20)-C(22)-N(3)  | -2.7(3)    |
| C(19)-C(20)-C(22)-S(1)  | -4.8(3)    |
| C(21)-C(20)-C(22)-S(1)  | 177.97(17) |
| C(20)-C(22)-N(3)-C(23)  | -178.6(2)  |
| S(1)-C(22)-N(3)-C(23)   | 0.8(3)     |
| N(3)-C(22)-S(1)-C(24)   | -0.6(2)    |
| C(20)-C(22)-S(1)-C(24)  | 178.8(2)   |
| C(22)-N(3)-C(23)-C(28)  | 178.4(2)   |
| C(22)-N(3)-C(23)-C(24)  | -0.6(3)    |
| N(3)-C(23)-C(24)-C(25)  | -179.7(2)  |

|                         |           |
|-------------------------|-----------|
| C(28)-C(23)-C(24)-C(25) | 1.3(4)    |
| N(3)-C(23)-C(24)-S(1)   | 0.1(3)    |
| C(28)-C(23)-C(24)-S(1)  | -178.9(2) |
| C(22)-S(1)-C(24)-C(25)  | -180.0(3) |
| C(22)-S(1)-C(24)-C(23)  | 0.25(19)  |
| C(23)-C(24)-C(25)-C(26) | -1.2(4)   |
| S(1)-C(24)-C(25)-C(26)  | 179.0(2)  |
| C(24)-C(25)-C(26)-C(27) | 0.5(4)    |
| C(25)-C(26)-C(27)-C(28) | 0.2(4)    |
| C(26)-C(27)-C(28)-C(23) | -0.2(4)   |
| N(3)-C(23)-C(28)-C(27)  | -179.5(2) |
| C(24)-C(23)-C(28)-C(27) | -0.6(4)   |

---

Symmetry transformations used to generate equivalent atoms:

**Table S24.** Crystal data and structure refinement for **CV10-O**.

|                                   |                                                        |
|-----------------------------------|--------------------------------------------------------|
| Identification code               | <b>CV10-O</b>                                          |
| Empirical formula                 | C <sub>30</sub> H <sub>39</sub> N <sub>3</sub> O S     |
| Formula weight                    | 489.70                                                 |
| Temperature                       | 223(2) K                                               |
| Wavelength                        | 0.71073 Å                                              |
| Crystal system                    | Triclinic                                              |
| Space group                       | P-1                                                    |
| Unit cell dimensions              | a = 8.1239(12) Å<br>b = 16.449(3) Å<br>c = 21.785(4) Å |
| Volume                            | 2768.3(8) Å <sup>3</sup>                               |
| Z                                 | 4                                                      |
| Density (calculated)              | 1.175 Mg/m <sup>3</sup>                                |
| Absorption coefficient            | 0.143 mm <sup>-1</sup>                                 |
| F(000)                            | 1056                                                   |
| Crystal size                      | 0.322 x 0.109 x 0.070 mm <sup>3</sup>                  |
| Theta range for data collection   | 1.953 to 28.288°.                                      |
| Index ranges                      | -10<=h<=10, -21<=k<=21, -29<=l<=28                     |
| Reflections collected             | 130915                                                 |
| Independent reflections           | 13700 [R(int) = 0.1501]                                |
| Completeness to theta = 26.03°    | 99.9 %                                                 |
| Absorption correction             | Semi-empirical from equivalents                        |
| Refinement method                 | Full-matrix least-squares on F <sup>2</sup>            |
| Data / restraints / parameters    | 13700 / 0 / 656                                        |
| Goodness-of-fit on F <sup>2</sup> | 1.022                                                  |
| Final R indices [I>2sigma(I)]     | R1 = 0.0666, wR2 = 0.1407                              |
| R indices (all data)              | R1 = 0.1849, wR2 = 0.1858                              |
| Largest diff. peak and hole       | 0.516 and -0.344 e.Å <sup>-3</sup>                     |

**Table S25.** Atomic coordinates ( $\times 10^4$ ) and equivalent isotropic displacement parameters ( $\text{\AA}^2 \times 10^3$ ) for **CV10-O**.  $U(\text{eq})$  is defined as one third of the trace of the orthogonalized  $U^{ij}$  tensor.

|       | x       | y       | z        | $U(\text{eq})$ |
|-------|---------|---------|----------|----------------|
| S(1)  | 6428(1) | 1457(1) | 2264(1)  | 54(1)          |
| S(2)  | 5458(1) | 3832(1) | 2719(1)  | 53(1)          |
| O(1)  | 7843(2) | -633(1) | 4422(1)  | 49(1)          |
| O(2)  | 2453(3) | 5659(1) | 557(1)   | 53(1)          |
| N(1)  | 6608(3) | -14(2)  | 2496(1)  | 48(1)          |
| N(2)  | 6388(5) | 2682(2) | 3869(1)  | 91(1)          |
| N(3)  | 6753(3) | 840(2)  | 6488(1)  | 61(1)          |
| N(4)  | 4331(3) | 5156(2) | 2469(1)  | 47(1)          |
| N(5)  | 5320(4) | 2592(2) | 1112(1)  | 80(1)          |
| N(6)  | 2317(4) | 3949(2) | -1585(1) | 84(1)          |
| C(1)  | 6493(3) | 602(2)  | 1624(1)  | 44(1)          |
| C(2)  | 6474(4) | 573(2)  | 976(1)   | 58(1)          |
| C(3)  | 6578(4) | -187(2) | 563(2)   | 60(1)          |
| C(4)  | 6666(4) | -916(2) | 772(2)   | 64(1)          |
| C(5)  | 6668(4) | -893(2) | 1410(2)  | 60(1)          |
| C(6)  | 6586(3) | -125(2) | 1842(1)  | 43(1)          |
| C(7)  | 6565(3) | 777(2)  | 2772(1)  | 43(1)          |
| C(8)  | 6630(3) | 1099(2) | 3469(1)  | 44(1)          |
| C(9)  | 6478(4) | 1974(2) | 3700(1)  | 58(1)          |
| C(10) | 6868(3) | 570(2)  | 3856(1)  | 44(1)          |
| C(11) | 6892(3) | 688(2)  | 4534(1)  | 40(1)          |
| C(12) | 6418(3) | 1391(2) | 4947(1)  | 45(1)          |
| C(13) | 6374(3) | 1459(2) | 5581(1)  | 46(1)          |
| C(14) | 6842(4) | 810(2)  | 5861(1)  | 46(1)          |
| C(15) | 7371(3) | 112(2)  | 5465(1)  | 44(1)          |
| C(16) | 7373(3) | 45(2)   | 4821(1)  | 40(1)          |

|       |          |          |         |        |
|-------|----------|----------|---------|--------|
| C(17) | 5877(5)  | 1516(2)  | 6902(2) | 79(1)  |
| C(18) | 7186(5)  | 2207(3)  | 7224(2) | 90(1)  |
| C(19) | 7421(4)  | 230(2)   | 6803(1) | 52(1)  |
| C(20) | 9328(4)  | 349(2)   | 6956(2) | 71(1)  |
| C(21) | 8341(4)  | -1307(2) | 4683(1) | 45(1)  |
| C(22) | 8711(4)  | -1998(2) | 4147(1) | 48(1)  |
| C(23) | 9321(4)  | -2714(2) | 4399(1) | 46(1)  |
| C(24) | 9577(4)  | -3482(2) | 3887(1) | 49(1)  |
| C(25) | 10188(4) | -4179(2) | 4161(1) | 51(1)  |
| C(26) | 10279(4) | -4992(2) | 3663(1) | 50(1)  |
| C(27) | 10800(4) | -5684(2) | 3962(2) | 65(1)  |
| C(28) | 10898(5) | -6507(2) | 3496(2) | 70(1)  |
| C(29) | 11490(7) | -7166(3) | 3834(2) | 116(2) |
| C(30) | 11585(7) | -7978(3) | 3424(3) | 141(2) |
| C(31) | 5364(3)  | 4681(2)  | 3359(1) | 44(1)  |
| C(32) | 5836(4)  | 4779(2)  | 4019(1) | 56(1)  |
| C(33) | 5650(4)  | 5530(2)  | 4433(1) | 55(1)  |
| C(34) | 5003(4)  | 6166(2)  | 4212(1) | 52(1)  |
| C(35) | 4545(4)  | 6075(2)  | 3564(1) | 50(1)  |
| C(36) | 4729(3)  | 5328(2)  | 3130(1) | 41(1)  |
| C(37) | 4657(3)  | 4406(2)  | 2196(1) | 44(1)  |
| C(38) | 4380(3)  | 4050(2)  | 1498(1) | 45(1)  |
| C(39) | 4883(4)  | 3237(2)  | 1276(1) | 54(1)  |
| C(40) | 3700(3)  | 4494(2)  | 1102(1) | 45(1)  |
| C(41) | 3283(3)  | 4308(2)  | 418(1)  | 44(1)  |
| C(42) | 3463(4)  | 3551(2)  | -13(1)  | 54(1)  |
| C(43) | 3127(4)  | 3417(2)  | -664(1) | 63(1)  |
| C(44) | 2563(4)  | 4053(2)  | -940(1) | 58(1)  |

|        |          |          |          |       |
|--------|----------|----------|----------|-------|
| C(45)  | 2300(3)  | 4800(2)  | -520(1)  | 47(1) |
| C(46)  | 2663(3)  | 4930(2)  | 136(1)   | 42(1) |
| C(49)  | 1595(4)  | 4546(2)  | -1892(1) | 54(1) |
| C(50)  | -284(4)  | 4469(2)  | -1952(2) | 70(1) |
| C(51)  | 1974(4)  | 6347(2)  | 312(1)   | 49(1) |
| C(52)  | 2031(4)  | 7105(2)  | 877(1)   | 52(1) |
| C(53)  | 1730(4)  | 7885(2)  | 651(1)   | 55(1) |
| C(54)  | 1737(4)  | 8682(2)  | 1180(1)  | 51(1) |
| C(55)  | 1628(4)  | 9451(2)  | 919(2)   | 58(1) |
| C(56)  | 1467(4)  | 10262(2) | 1397(1)  | 55(1) |
| C(57)  | 1271(4)  | 10990(2) | 1085(2)  | 61(1) |
| C(58)  | 927(4)   | 11796(2) | 1518(2)  | 59(1) |
| C(59)  | 345(5)   | 12422(2) | 1153(2)  | 72(1) |
| C(60)  | -61(5)   | 13225(2) | 1573(2)  | 90(1) |
| C(47A) | 1771(12) | 2995(8)  | -2017(5) | 48(3) |
| C(48A) | 3422(13) | 2810(9)  | -2237(5) | 58(4) |
| C(47B) | 3213(9)  | 3316(6)  | -2011(3) | 50(2) |
| C(48B) | 1886(10) | 2543(6)  | -2290(5) | 62(2) |

---

**Table S26.** Bond lengths [Å] and angles [°] for **CV10-O**.

---

|             |           |
|-------------|-----------|
| S(1)-C(1)   | 1.735(3)  |
| S(1)-C(7)   | 1.756(3)  |
| S(2)-C(31)  | 1.734(3)  |
| S(2)-C(37)  | 1.756(3)  |
| O(1)-C(16)  | 1.364(3)  |
| O(1)-C(21)  | 1.439(3)  |
| O(2)-C(46)  | 1.364(3)  |
| O(2)-C(51)  | 1.435(3)  |
| N(1)-C(7)   | 1.300(3)  |
| N(1)-C(6)   | 1.389(3)  |
| N(2)-C(9)   | 1.147(4)  |
| N(3)-C(14)  | 1.365(3)  |
| N(3)-C(19)  | 1.462(3)  |
| N(3)-C(17)  | 1.555(4)  |
| N(4)-C(37)  | 1.306(3)  |
| N(4)-C(36)  | 1.386(3)  |
| N(5)-C(39)  | 1.147(4)  |
| N(6)-C(44)  | 1.360(4)  |
| N(6)-C(49)  | 1.451(4)  |
| N(6)-C(47B) | 1.535(10) |
| N(6)-C(47A) | 1.601(14) |
| C(1)-C(6)   | 1.396(4)  |
| C(1)-C(2)   | 1.399(4)  |
| C(2)-C(3)   | 1.370(4)  |
| C(2)-H(2)   | 0.9400    |
| C(3)-C(4)   | 1.390(4)  |
| C(3)-H(3)   | 0.9400    |
| C(4)-C(5)   | 1.379(4)  |
| C(4)-H(4)   | 0.9400    |
| C(5)-C(6)   | 1.396(4)  |
| C(5)-H(5)   | 0.9400    |
| C(7)-C(8)   | 1.474(4)  |
| C(8)-C(10)  | 1.363(4)  |
| C(8)-C(9)   | 1.431(4)  |



|              |          |
|--------------|----------|
| C(10)-C(11)  | 1.439(4) |
| C(10)-H(10)  | 0.9400   |
| C(11)-C(12)  | 1.407(4) |
| C(11)-C(16)  | 1.421(4) |
| C(12)-C(13)  | 1.365(4) |
| C(12)-H(12)  | 0.9400   |
| C(13)-C(14)  | 1.417(4) |
| C(13)-H(13)  | 0.9400   |
| C(14)-C(15)  | 1.407(4) |
| C(15)-C(16)  | 1.379(4) |
| C(15)-H(15)  | 0.9400   |
| C(17)-C(18)  | 1.435(5) |
| C(17)-H(17A) | 0.9800   |
| C(17)-H(17B) | 0.9800   |
| C(18)-H(18A) | 0.9700   |
| C(18)-H(18B) | 0.9700   |
| C(18)-H(18C) | 0.9700   |
| C(19)-C(20)  | 1.521(4) |
| C(19)-H(19A) | 0.9800   |
| C(19)-H(19B) | 0.9800   |
| C(20)-H(20A) | 0.9700   |
| C(20)-H(20B) | 0.9700   |
| C(20)-H(20C) | 0.9700   |
| C(21)-C(22)  | 1.507(4) |
| C(21)-H(21A) | 0.9800   |
| C(21)-H(21B) | 0.9800   |
| C(22)-C(23)  | 1.522(4) |
| C(22)-H(22A) | 0.9800   |
| C(22)-H(22B) | 0.9800   |
| C(23)-C(24)  | 1.523(4) |
| C(23)-H(23A) | 0.9800   |
| C(23)-H(23B) | 0.9800   |
| C(24)-C(25)  | 1.520(4) |
| C(24)-H(24A) | 0.9800   |
| C(24)-H(24B) | 0.9800   |
| C(25)-C(26)  | 1.520(4) |

|              |          |
|--------------|----------|
| C(25)-H(25A) | 0.9800   |
| C(25)-H(25B) | 0.9800   |
| C(26)-C(27)  | 1.518(4) |
| C(26)-H(26A) | 0.9800   |
| C(26)-H(26B) | 0.9800   |
| C(27)-C(28)  | 1.500(4) |
| C(27)-H(27A) | 0.9800   |
| C(27)-H(27B) | 0.9800   |
| C(28)-C(29)  | 1.539(5) |
| C(28)-H(28A) | 0.9800   |
| C(28)-H(28B) | 0.9800   |
| C(29)-C(30)  | 1.431(5) |
| C(29)-H(29A) | 0.9800   |
| C(29)-H(29B) | 0.9800   |
| C(30)-H(30A) | 0.9700   |
| C(30)-H(30B) | 0.9700   |
| C(30)-H(30C) | 0.9700   |
| C(31)-C(32)  | 1.403(4) |
| C(31)-C(36)  | 1.404(4) |
| C(32)-C(33)  | 1.378(4) |
| C(32)-H(32)  | 0.9400   |
| C(33)-C(34)  | 1.380(4) |
| C(33)-H(33)  | 0.9400   |
| C(34)-C(35)  | 1.380(4) |
| C(34)-H(34)  | 0.9400   |
| C(35)-C(36)  | 1.394(4) |
| C(35)-H(35)  | 0.9400   |
| C(37)-C(38)  | 1.469(4) |
| C(38)-C(40)  | 1.364(4) |
| C(38)-C(39)  | 1.433(4) |
| C(40)-C(41)  | 1.433(4) |
| C(40)-H(40)  | 0.9400   |
| C(41)-C(42)  | 1.402(4) |
| C(41)-C(46)  | 1.422(4) |
| C(42)-C(43)  | 1.368(4) |
| C(42)-H(42)  | 0.9400   |

|              |          |
|--------------|----------|
| C(43)-C(44)  | 1.418(4) |
| C(43)-H(43)  | 0.9400   |
| C(44)-C(45)  | 1.399(4) |
| C(45)-C(46)  | 1.381(4) |
| C(45)-H(45)  | 0.9400   |
| C(49)-C(50)  | 1.503(4) |
| C(49)-H(49A) | 0.9800   |
| C(49)-H(49B) | 0.9800   |
| C(50)-H(50A) | 0.9700   |
| C(50)-H(50B) | 0.9700   |
| C(50)-H(50C) | 0.9700   |
| C(51)-C(52)  | 1.516(4) |
| C(51)-H(51A) | 0.9800   |
| C(51)-H(51B) | 0.9800   |
| C(52)-C(53)  | 1.515(4) |
| C(52)-H(52A) | 0.9800   |
| C(52)-H(52B) | 0.9800   |
| C(53)-C(54)  | 1.520(4) |
| C(53)-H(53A) | 0.9800   |
| C(53)-H(53B) | 0.9800   |
| C(54)-C(55)  | 1.515(4) |
| C(54)-H(54A) | 0.9800   |
| C(54)-H(54B) | 0.9800   |
| C(55)-C(56)  | 1.511(4) |
| C(55)-H(55A) | 0.9800   |
| C(55)-H(55B) | 0.9800   |
| C(56)-C(57)  | 1.528(4) |
| C(56)-H(56A) | 0.9800   |
| C(56)-H(56B) | 0.9800   |
| C(57)-C(58)  | 1.507(4) |
| C(57)-H(57A) | 0.9800   |
| C(57)-H(57B) | 0.9800   |
| C(58)-C(59)  | 1.527(4) |
| C(58)-H(58A) | 0.9800   |
| C(58)-H(58B) | 0.9800   |
| C(59)-C(60)  | 1.511(4) |

|                   |           |
|-------------------|-----------|
| C(59)-H(59A)      | 0.9800    |
| C(59)-H(59B)      | 0.9800    |
| C(60)-H(60A)      | 0.9700    |
| C(60)-H(60B)      | 0.9700    |
| C(60)-H(60C)      | 0.9700    |
| C(47A)-C(48A)     | 1.52(2)   |
| C(47A)-H(47A)     | 0.9800    |
| C(47A)-H(47B)     | 0.9800    |
| C(48A)-H(48A)     | 0.9700    |
| C(48A)-H(48B)     | 0.9700    |
| C(48A)-H(48C)     | 0.9700    |
| C(47B)-C(48B)     | 1.514(14) |
| C(47B)-H(47C)     | 0.9800    |
| C(47B)-H(47D)     | 0.9800    |
| C(48B)-H(48D)     | 0.9700    |
| C(48B)-H(48E)     | 0.9700    |
| C(48B)-H(48F)     | 0.9700    |
|                   |           |
| C(1)-S(1)-C(7)    | 88.69(14) |
| C(31)-S(2)-C(37)  | 88.87(14) |
| C(16)-O(1)-C(21)  | 118.4(2)  |
| C(46)-O(2)-C(51)  | 118.9(2)  |
| C(7)-N(1)-C(6)    | 110.0(2)  |
| C(14)-N(3)-C(19)  | 122.5(2)  |
| C(14)-N(3)-C(17)  | 121.3(2)  |
| C(19)-N(3)-C(17)  | 116.2(2)  |
| C(37)-N(4)-C(36)  | 110.4(2)  |
| C(44)-N(6)-C(49)  | 123.4(3)  |
| C(44)-N(6)-C(47B) | 119.9(3)  |
| C(49)-N(6)-C(47B) | 114.9(3)  |
| C(44)-N(6)-C(47A) | 116.0(4)  |
| C(49)-N(6)-C(47A) | 111.4(4)  |
| C(6)-C(1)-C(2)    | 121.1(3)  |

|                   |          |
|-------------------|----------|
| C(6)-C(1)-S(1)    | 109.4(2) |
| C(2)-C(1)-S(1)    | 129.5(2) |
| C(3)-C(2)-C(1)    | 118.1(3) |
| C(3)-C(2)-H(2)    | 121.0    |
| C(1)-C(2)-H(2)    | 121.0    |
| C(2)-C(3)-C(4)    | 121.6(3) |
| C(2)-C(3)-H(3)    | 119.2    |
| C(4)-C(3)-H(3)    | 119.2    |
| C(5)-C(4)-C(3)    | 120.6(3) |
| C(5)-C(4)-H(4)    | 119.7    |
| C(3)-C(4)-H(4)    | 119.7    |
| C(4)-C(5)-C(6)    | 119.0(3) |
| C(4)-C(5)-H(5)    | 120.5    |
| C(6)-C(5)-H(5)    | 120.5    |
| N(1)-C(6)-C(5)    | 124.6(3) |
| N(1)-C(6)-C(1)    | 115.7(3) |
| C(5)-C(6)-C(1)    | 119.7(3) |
| N(1)-C(7)-C(8)    | 122.8(2) |
| N(1)-C(7)-S(1)    | 116.1(2) |
| C(8)-C(7)-S(1)    | 121.1(2) |
| C(10)-C(8)-C(9)   | 123.9(3) |
| C(10)-C(8)-C(7)   | 119.6(3) |
| C(9)-C(8)-C(7)    | 116.5(2) |
| N(2)-C(9)-C(8)    | 177.7(4) |
| C(8)-C(10)-C(11)  | 131.9(3) |
| C(8)-C(10)-H(10)  | 114.1    |
| C(11)-C(10)-H(10) | 114.1    |
| C(12)-C(11)-C(16) | 115.7(2) |
| C(12)-C(11)-C(10) | 125.1(3) |
| C(16)-C(11)-C(10) | 119.1(3) |
| C(13)-C(12)-C(11) | 123.3(3) |

|                     |          |
|---------------------|----------|
| C(13)-C(12)-H(12)   | 118.3    |
| C(11)-C(12)-H(12)   | 118.3    |
| C(12)-C(13)-C(14)   | 120.4(3) |
| C(12)-C(13)-H(13)   | 119.8    |
| C(14)-C(13)-H(13)   | 119.8    |
| N(3)-C(14)-C(15)    | 120.4(3) |
| N(3)-C(14)-C(13)    | 122.1(3) |
| C(15)-C(14)-C(13)   | 117.5(3) |
| C(16)-C(15)-C(14)   | 121.2(3) |
| C(16)-C(15)-H(15)   | 119.4    |
| C(14)-C(15)-H(15)   | 119.4    |
| O(1)-C(16)-C(15)    | 122.6(2) |
| O(1)-C(16)-C(11)    | 115.6(2) |
| C(15)-C(16)-C(11)   | 121.7(3) |
| C(18)-C(17)-N(3)    | 105.6(3) |
| C(18)-C(17)-H(17A)  | 110.6    |
| N(3)-C(17)-H(17A)   | 110.6    |
| C(18)-C(17)-H(17B)  | 110.6    |
| N(3)-C(17)-H(17B)   | 110.6    |
| H(17A)-C(17)-H(17B) | 108.8    |
| C(17)-C(18)-H(18A)  | 109.5    |
| C(17)-C(18)-H(18B)  | 109.5    |
| H(18A)-C(18)-H(18B) | 109.5    |
| C(17)-C(18)-H(18C)  | 109.5    |
| H(18A)-C(18)-H(18C) | 109.5    |
| H(18B)-C(18)-H(18C) | 109.5    |
| N(3)-C(19)-C(20)    | 114.8(3) |
| N(3)-C(19)-H(19A)   | 108.6    |
| C(20)-C(19)-H(19A)  | 108.6    |
| N(3)-C(19)-H(19B)   | 108.6    |
| C(20)-C(19)-H(19B)  | 108.6    |

|                     |          |
|---------------------|----------|
| H(19A)-C(19)-H(19B) | 107.5    |
| C(19)-C(20)-H(20A)  | 109.5    |
| C(19)-C(20)-H(20B)  | 109.5    |
| H(20A)-C(20)-H(20B) | 109.5    |
| C(19)-C(20)-H(20C)  | 109.5    |
| H(20A)-C(20)-H(20C) | 109.5    |
| H(20B)-C(20)-H(20C) | 109.5    |
| O(1)-C(21)-C(22)    | 108.5(2) |
| O(1)-C(21)-H(21A)   | 110.0    |
| C(22)-C(21)-H(21A)  | 110.0    |
| O(1)-C(21)-H(21B)   | 110.0    |
| C(22)-C(21)-H(21B)  | 110.0    |
| H(21A)-C(21)-H(21B) | 108.4    |
| C(21)-C(22)-C(23)   | 111.0(2) |
| C(21)-C(22)-H(22A)  | 109.4    |
| C(23)-C(22)-H(22A)  | 109.4    |
| C(21)-C(22)-H(22B)  | 109.4    |
| C(23)-C(22)-H(22B)  | 109.4    |
| H(22A)-C(22)-H(22B) | 108.0    |
| C(22)-C(23)-C(24)   | 115.1(2) |
| C(22)-C(23)-H(23A)  | 108.5    |
| C(24)-C(23)-H(23A)  | 108.5    |
| C(22)-C(23)-H(23B)  | 108.5    |
| C(24)-C(23)-H(23B)  | 108.5    |
| H(23A)-C(23)-H(23B) | 107.5    |
| C(25)-C(24)-C(23)   | 113.2(2) |
| C(25)-C(24)-H(24A)  | 108.9    |
| C(23)-C(24)-H(24A)  | 108.9    |
| C(25)-C(24)-H(24B)  | 108.9    |
| C(23)-C(24)-H(24B)  | 108.9    |
| H(24A)-C(24)-H(24B) | 107.7    |

|                     |          |
|---------------------|----------|
| C(24)-C(25)-C(26)   | 114.6(2) |
| C(24)-C(25)-H(25A)  | 108.6    |
| C(26)-C(25)-H(25A)  | 108.6    |
| C(24)-C(25)-H(25B)  | 108.6    |
| C(26)-C(25)-H(25B)  | 108.6    |
| H(25A)-C(25)-H(25B) | 107.6    |
| C(27)-C(26)-C(25)   | 112.5(2) |
| C(27)-C(26)-H(26A)  | 109.1    |
| C(25)-C(26)-H(26A)  | 109.1    |
| C(27)-C(26)-H(26B)  | 109.1    |
| C(25)-C(26)-H(26B)  | 109.1    |
| H(26A)-C(26)-H(26B) | 107.8    |
| C(28)-C(27)-C(26)   | 115.2(3) |
| C(28)-C(27)-H(27A)  | 108.5    |
| C(26)-C(27)-H(27A)  | 108.5    |
| C(28)-C(27)-H(27B)  | 108.5    |
| C(26)-C(27)-H(27B)  | 108.5    |
| H(27A)-C(27)-H(27B) | 107.5    |
| C(27)-C(28)-C(29)   | 112.2(3) |
| C(27)-C(28)-H(28A)  | 109.2    |
| C(29)-C(28)-H(28A)  | 109.2    |
| C(27)-C(28)-H(28B)  | 109.2    |
| C(29)-C(28)-H(28B)  | 109.2    |
| H(28A)-C(28)-H(28B) | 107.9    |
| C(30)-C(29)-C(28)   | 115.9(4) |
| C(30)-C(29)-H(29A)  | 108.3    |
| C(28)-C(29)-H(29A)  | 108.3    |
| C(30)-C(29)-H(29B)  | 108.3    |
| C(28)-C(29)-H(29B)  | 108.3    |
| H(29A)-C(29)-H(29B) | 107.4    |
| C(29)-C(30)-H(30A)  | 109.5    |



|                     |          |
|---------------------|----------|
| C(29)-C(30)-H(30B)  | 109.5    |
| H(30A)-C(30)-H(30B) | 109.5    |
| C(29)-C(30)-H(30C)  | 109.5    |
| H(30A)-C(30)-H(30C) | 109.5    |
| H(30B)-C(30)-H(30C) | 109.5    |
| C(32)-C(31)-C(36)   | 121.0(3) |
| C(32)-C(31)-S(2)    | 129.4(2) |
| C(36)-C(31)-S(2)    | 109.6(2) |
| C(33)-C(32)-C(31)   | 117.9(3) |
| C(33)-C(32)-H(32)   | 121.1    |
| C(31)-C(32)-H(32)   | 121.1    |
| C(32)-C(33)-C(34)   | 121.6(3) |
| C(32)-C(33)-H(33)   | 119.2    |
| C(34)-C(33)-H(33)   | 119.2    |
| C(35)-C(34)-C(33)   | 120.9(3) |
| C(35)-C(34)-H(34)   | 119.5    |
| C(33)-C(34)-H(34)   | 119.5    |
| C(34)-C(35)-C(36)   | 119.2(3) |
| C(34)-C(35)-H(35)   | 120.4    |
| C(36)-C(35)-H(35)   | 120.4    |
| N(4)-C(36)-C(35)    | 125.3(3) |
| N(4)-C(36)-C(31)    | 115.3(3) |
| C(35)-C(36)-C(31)   | 119.4(3) |
| N(4)-C(37)-C(38)    | 123.0(3) |
| N(4)-C(37)-S(2)     | 115.8(2) |
| C(38)-C(37)-S(2)    | 121.2(2) |
| C(40)-C(38)-C(39)   | 123.8(3) |
| C(40)-C(38)-C(37)   | 120.2(3) |
| C(39)-C(38)-C(37)   | 116.0(2) |
| N(5)-C(39)-C(38)    | 178.1(3) |
| C(38)-C(40)-C(41)   | 132.3(3) |

|                     |          |
|---------------------|----------|
| C(38)-C(40)-H(40)   | 113.8    |
| C(41)-C(40)-H(40)   | 113.8    |
| C(42)-C(41)-C(46)   | 115.6(3) |
| C(42)-C(41)-C(40)   | 125.0(3) |
| C(46)-C(41)-C(40)   | 119.3(3) |
| C(43)-C(42)-C(41)   | 123.0(3) |
| C(43)-C(42)-H(42)   | 118.5    |
| C(41)-C(42)-H(42)   | 118.5    |
| C(42)-C(43)-C(44)   | 120.8(3) |
| C(42)-C(43)-H(43)   | 119.6    |
| C(44)-C(43)-H(43)   | 119.6    |
| N(6)-C(44)-C(45)    | 121.2(3) |
| N(6)-C(44)-C(43)    | 121.5(3) |
| C(45)-C(44)-C(43)   | 117.3(3) |
| C(46)-C(45)-C(44)   | 121.2(3) |
| C(46)-C(45)-H(45)   | 119.4    |
| C(44)-C(45)-H(45)   | 119.4    |
| O(2)-C(46)-C(45)    | 122.5(2) |
| O(2)-C(46)-C(41)    | 115.5(2) |
| C(45)-C(46)-C(41)   | 121.9(3) |
| N(6)-C(49)-C(50)    | 114.2(3) |
| N(6)-C(49)-H(49A)   | 108.7    |
| C(50)-C(49)-H(49A)  | 108.7    |
| N(6)-C(49)-H(49B)   | 108.7    |
| C(50)-C(49)-H(49B)  | 108.7    |
| H(49A)-C(49)-H(49B) | 107.6    |
| C(49)-C(50)-H(50A)  | 109.5    |
| C(49)-C(50)-H(50B)  | 109.5    |
| H(50A)-C(50)-H(50B) | 109.5    |
| C(49)-C(50)-H(50C)  | 109.5    |
| H(50A)-C(50)-H(50C) | 109.5    |

|                     |          |
|---------------------|----------|
| H(50B)-C(50)-H(50C) | 109.5    |
| O(2)-C(51)-C(52)    | 108.0(2) |
| O(2)-C(51)-H(51A)   | 110.1    |
| C(52)-C(51)-H(51A)  | 110.1    |
| O(2)-C(51)-H(51B)   | 110.1    |
| C(52)-C(51)-H(51B)  | 110.1    |
| H(51A)-C(51)-H(51B) | 108.4    |
| C(53)-C(52)-C(51)   | 110.9(2) |
| C(53)-C(52)-H(52A)  | 109.5    |
| C(51)-C(52)-H(52A)  | 109.5    |
| C(53)-C(52)-H(52B)  | 109.5    |
| C(51)-C(52)-H(52B)  | 109.5    |
| H(52A)-C(52)-H(52B) | 108.0    |
| C(52)-C(53)-C(54)   | 115.3(2) |
| C(52)-C(53)-H(53A)  | 108.4    |
| C(54)-C(53)-H(53A)  | 108.4    |
| C(52)-C(53)-H(53B)  | 108.4    |
| C(54)-C(53)-H(53B)  | 108.4    |
| H(53A)-C(53)-H(53B) | 107.5    |
| C(55)-C(54)-C(53)   | 111.8(2) |
| C(55)-C(54)-H(54A)  | 109.3    |
| C(53)-C(54)-H(54A)  | 109.3    |
| C(55)-C(54)-H(54B)  | 109.3    |
| C(53)-C(54)-H(54B)  | 109.3    |
| H(54A)-C(54)-H(54B) | 107.9    |
| C(56)-C(55)-C(54)   | 116.1(3) |
| C(56)-C(55)-H(55A)  | 108.3    |
| C(54)-C(55)-H(55A)  | 108.3    |
| C(56)-C(55)-H(55B)  | 108.3    |
| C(54)-C(55)-H(55B)  | 108.3    |
| H(55A)-C(55)-H(55B) | 107.4    |

|                     |           |
|---------------------|-----------|
| C(55)-C(56)-C(57)   | 112.4(3)  |
| C(55)-C(56)-H(56A)  | 109.1     |
| C(57)-C(56)-H(56A)  | 109.1     |
| C(55)-C(56)-H(56B)  | 109.1     |
| C(57)-C(56)-H(56B)  | 109.1     |
| H(56A)-C(56)-H(56B) | 107.8     |
| C(58)-C(57)-C(56)   | 115.5(3)  |
| C(58)-C(57)-H(57A)  | 108.4     |
| C(56)-C(57)-H(57A)  | 108.4     |
| C(58)-C(57)-H(57B)  | 108.4     |
| C(56)-C(57)-H(57B)  | 108.4     |
| H(57A)-C(57)-H(57B) | 107.5     |
| C(57)-C(58)-C(59)   | 113.0(3)  |
| C(57)-C(58)-H(58A)  | 109.0     |
| C(59)-C(58)-H(58A)  | 109.0     |
| C(57)-C(58)-H(58B)  | 109.0     |
| C(59)-C(58)-H(58B)  | 109.0     |
| H(58A)-C(58)-H(58B) | 107.8     |
| C(60)-C(59)-C(58)   | 114.2(3)  |
| C(60)-C(59)-H(59A)  | 108.7     |
| C(58)-C(59)-H(59A)  | 108.7     |
| C(60)-C(59)-H(59B)  | 108.7     |
| C(58)-C(59)-H(59B)  | 108.7     |
| H(59A)-C(59)-H(59B) | 107.6     |
| C(59)-C(60)-H(60A)  | 109.5     |
| C(59)-C(60)-H(60B)  | 109.5     |
| H(60A)-C(60)-H(60B) | 109.5     |
| C(59)-C(60)-H(60C)  | 109.5     |
| H(60A)-C(60)-H(60C) | 109.5     |
| H(60B)-C(60)-H(60C) | 109.5     |
| C(48A)-C(47A)-N(6)  | 100.5(10) |

|                      |          |
|----------------------|----------|
| C(48A)-C(47A)-H(47A) | 111.7    |
| N(6)-C(47A)-H(47A)   | 111.7    |
| C(48A)-C(47A)-H(47B) | 111.7    |
| N(6)-C(47A)-H(47B)   | 111.7    |
| H(47A)-C(47A)-H(47B) | 109.4    |
| C(47A)-C(48A)-H(48A) | 109.5    |
| C(47A)-C(48A)-H(48B) | 109.5    |
| H(48A)-C(48A)-H(48B) | 109.5    |
| C(47A)-C(48A)-H(48C) | 109.5    |
| H(48A)-C(48A)-H(48C) | 109.5    |
| H(48B)-C(48A)-H(48C) | 109.5    |
| C(48B)-C(47B)-N(6)   | 104.2(7) |
| C(48B)-C(47B)-H(47C) | 110.9    |
| N(6)-C(47B)-H(47C)   | 110.9    |
| C(48B)-C(47B)-H(47D) | 110.9    |
| N(6)-C(47B)-H(47D)   | 110.9    |
| H(47C)-C(47B)-H(47D) | 108.9    |
| C(47B)-C(48B)-H(48D) | 109.5    |
| C(47B)-C(48B)-H(48E) | 109.5    |
| H(48D)-C(48B)-H(48E) | 109.5    |
| C(47B)-C(48B)-H(48F) | 109.5    |
| H(48D)-C(48B)-H(48F) | 109.5    |
| H(48E)-C(48B)-H(48F) | 109.5    |

---

Symmetry transformations used to generate equivalent atoms:

**Table 27.** Anisotropic displacement parameters ( $\text{\AA}^2 \times 10^3$ ) for **CV10-O**. The anisotropic displacement factor exponent takes the form:  $-2\pi^2[h^2a^{*2}U^{11} + \dots + 2hka^*b^*U^{12}]$ .

|       | U <sup>11</sup> | U <sup>22</sup> | U <sup>33</sup> | U <sup>23</sup> | U <sup>13</sup> | U <sup>12</sup> |
|-------|-----------------|-----------------|-----------------|-----------------|-----------------|-----------------|
| S(1)  | 79(1)           | 43(1)           | 44(1)           | 17(1)           | 10(1)           | 14(1)           |
| S(2)  | 72(1)           | 44(1)           | 43(1)           | 14(1)           | 2(1)            | 16(1)           |
| O(1)  | 68(1)           | 45(1)           | 39(1)           | 12(1)           | 14(1)           | 21(1)           |
| O(2)  | 85(2)           | 41(1)           | 36(1)           | 8(1)            | 9(1)            | 24(1)           |
| N(1)  | 64(2)           | 42(2)           | 42(1)           | 16(1)           | 11(1)           | 13(1)           |
| N(2)  | 162(3)          | 51(2)           | 66(2)           | 18(2)           | 19(2)           | 31(2)           |
| N(3)  | 98(2)           | 57(2)           | 35(1)           | 9(1)            | 16(1)           | 38(2)           |
| N(4)  | 54(2)           | 46(2)           | 42(1)           | 12(1)           | 2(1)            | 11(1)           |
| N(5)  | 114(3)          | 67(2)           | 62(2)           | 14(2)           | 4(2)            | 40(2)           |
| N(6)  | 161(3)          | 64(2)           | 32(2)           | 4(1)            | 8(2)            | 68(2)           |
| C(1)  | 51(2)           | 43(2)           | 41(2)           | 12(1)           | 8(1)            | 9(1)            |
| C(2)  | 82(2)           | 54(2)           | 44(2)           | 20(2)           | 13(2)           | 18(2)           |
| C(3)  | 81(2)           | 66(2)           | 40(2)           | 16(2)           | 17(2)           | 22(2)           |
| C(4)  | 92(3)           | 56(2)           | 45(2)           | 7(2)            | 18(2)           | 23(2)           |
| C(5)  | 86(2)           | 50(2)           | 53(2)           | 18(2)           | 17(2)           | 20(2)           |
| C(6)  | 51(2)           | 42(2)           | 40(2)           | 14(1)           | 11(1)           | 11(1)           |
| C(7)  | 48(2)           | 45(2)           | 40(2)           | 17(1)           | 8(1)            | 10(1)           |
| C(8)  | 51(2)           | 42(2)           | 40(2)           | 11(1)           | 7(1)            | 10(1)           |
| C(9)  | 91(2)           | 50(2)           | 40(2)           | 19(2)           | 13(2)           | 17(2)           |
| C(10) | 49(2)           | 43(2)           | 42(2)           | 12(1)           | 9(1)            | 10(1)           |
| C(11) | 45(2)           | 39(2)           | 37(2)           | 10(1)           | 6(1)            | 7(1)            |
| C(12) | 53(2)           | 39(2)           | 43(2)           | 10(1)           | 4(1)            | 10(1)           |
| C(13) | 60(2)           | 39(2)           | 40(2)           | 8(1)            | 8(1)            | 15(1)           |
| C(14) | 58(2)           | 44(2)           | 35(2)           | 7(1)            | 8(1)            | 11(1)           |
| C(15) | 56(2)           | 41(2)           | 36(2)           | 12(1)           | 4(1)            | 12(1)           |

|       |        |        |        |       |       |        |
|-------|--------|--------|--------|-------|-------|--------|
| C(16) | 46(2)  | 37(2)  | 37(2)  | 8(1)  | 6(1)  | 8(1)   |
| C(17) | 83(3)  | 91(3)  | 64(2)  | 40(2) | -8(2) | -10(2) |
| C(18) | 82(3)  | 108(3) | 84(3)  | 52(3) | -3(2) | -3(2)  |
| C(19) | 68(2)  | 51(2)  | 43(2)  | 18(2) | 13(2) | 19(2)  |
| C(20) | 71(2)  | 79(3)  | 60(2)  | 14(2) | 4(2)  | 13(2)  |
| C(21) | 56(2)  | 42(2)  | 40(2)  | 11(1) | 8(1)  | 13(1)  |
| C(22) | 58(2)  | 45(2)  | 45(2)  | 13(2) | 11(1) | 12(1)  |
| C(23) | 51(2)  | 43(2)  | 45(2)  | 12(1) | 7(1)  | 10(1)  |
| C(24) | 57(2)  | 45(2)  | 49(2)  | 13(2) | 16(1) | 15(1)  |
| C(25) | 52(2)  | 48(2)  | 54(2)  | 14(2) | 10(2) | 14(1)  |
| C(26) | 54(2)  | 47(2)  | 52(2)  | 15(2) | 13(1) | 15(1)  |
| C(27) | 84(2)  | 55(2)  | 63(2)  | 20(2) | 8(2)  | 28(2)  |
| C(28) | 88(3)  | 57(2)  | 73(2)  | 25(2) | 17(2) | 29(2)  |
| C(29) | 199(5) | 65(3)  | 93(3)  | 26(3) | 18(3) | 58(3)  |
| C(30) | 201(6) | 75(3)  | 151(5) | 29(3) | 9(4)  | 59(4)  |
| C(31) | 51(2)  | 41(2)  | 42(2)  | 12(1) | 7(1)  | 6(1)   |
| C(32) | 72(2)  | 50(2)  | 46(2)  | 18(2) | 2(2)  | 9(2)   |
| C(33) | 71(2)  | 54(2)  | 36(2)  | 11(2) | 1(2)  | 1(2)   |
| C(34) | 62(2)  | 46(2)  | 44(2)  | 4(2)  | 7(2)  | 4(2)   |
| C(35) | 58(2)  | 45(2)  | 48(2)  | 13(2) | 7(2)  | 12(1)  |
| C(36) | 41(2)  | 40(2)  | 42(2)  | 12(1) | 3(1)  | 6(1)   |
| C(37) | 48(2)  | 42(2)  | 45(2)  | 14(1) | 6(1)  | 9(1)   |
| C(38) | 53(2)  | 43(2)  | 41(2)  | 11(1) | 5(1)  | 10(1)  |
| C(39) | 67(2)  | 52(2)  | 45(2)  | 15(2) | 1(2)  | 18(2)  |
| C(40) | 52(2)  | 40(2)  | 42(2)  | 8(1)  | 6(1)  | 9(1)   |
| C(41) | 52(2)  | 40(2)  | 38(2)  | 9(1)  | 7(1)  | 9(1)   |
| C(42) | 76(2)  | 43(2)  | 44(2)  | 10(2) | 2(2)  | 22(2)  |
| C(43) | 96(3)  | 50(2)  | 42(2)  | 2(2)  | 6(2)  | 35(2)  |

|        |        |       |        |       |       |       |
|--------|--------|-------|--------|-------|-------|-------|
| C(44)  | 89(2)  | 49(2) | 36(2)  | 6(2)  | 6(2)  | 29(2) |
| C(45)  | 62(2)  | 41(2) | 39(2)  | 11(1) | 7(1)  | 17(1) |
| C(46)  | 53(2)  | 38(2) | 36(2)  | 8(1)  | 7(1)  | 14(1) |
| C(49)  | 75(2)  | 54(2) | 37(2)  | 11(2) | 11(2) | 22(2) |
| C(50)  | 80(3)  | 64(2) | 63(2)  | 13(2) | 12(2) | 6(2)  |
| C(51)  | 69(2)  | 42(2) | 40(2)  | 14(1) | 8(1)  | 18(2) |
| C(52)  | 72(2)  | 45(2) | 39(2)  | 9(2)  | 8(2)  | 16(2) |
| C(53)  | 74(2)  | 45(2) | 48(2)  | 14(2) | 10(2) | 14(2) |
| C(54)  | 68(2)  | 40(2) | 47(2)  | 10(2) | 11(2) | 12(2) |
| C(55)  | 81(2)  | 43(2) | 53(2)  | 14(2) | 21(2) | 14(2) |
| C(56)  | 68(2)  | 46(2) | 55(2)  | 16(2) | 12(2) | 13(2) |
| C(57)  | 81(2)  | 45(2) | 60(2)  | 16(2) | 16(2) | 12(2) |
| C(58)  | 74(2)  | 47(2) | 60(2)  | 16(2) | 15(2) | 14(2) |
| C(59)  | 88(3)  | 52(2) | 77(3)  | 23(2) | 7(2)  | 12(2) |
| C(60)  | 104(3) | 57(2) | 110(3) | 19(2) | 13(2) | 29(2) |
| C(47A) | 55(6)  | 54(7) | 36(5)  | 12(5) | 3(4)  | 14(5) |
| C(48A) | 77(7)  | 50(7) | 51(6)  | 7(5)  | 22(5) | 28(5) |
| C(47B) | 66(5)  | 42(5) | 45(4)  | 11(4) | 14(3) | 14(3) |
| C(48B) | 68(5)  | 53(5) | 60(5)  | 7(4)  | 3(4)  | 7(4)  |

---



**Table 28.** Hydrogen coordinates ( $\times 10^4$ ) and isotropic displacement parameters ( $\text{\AA}^2 \times 10^3$ ) for **CV10-O**.

|        | x     | y     | z    | U(eq) |
|--------|-------|-------|------|-------|
| H(2)   | 6392  | 1061  | 828  | 69    |
| H(3)   | 6591  | -215  | 127  | 72    |
| H(4)   | 6724  | -1430 | 477  | 77    |
| H(5)   | 6724  | -1387 | 1550 | 73    |
| H(10)  | 7049  | 27    | 3640 | 53    |
| H(12)  | 6115  | 1836  | 4777 | 54    |
| H(13)  | 6031  | 1940  | 5834 | 56    |
| H(15)  | 7730  | -318  | 5641 | 53    |
| H(17A) | 5024  | 1704  | 6630 | 95    |
| H(17B) | 5336  | 1285  | 7213 | 95    |
| H(18A) | 6713  | 2653  | 7492 | 135   |
| H(18B) | 8020  | 2009  | 7488 | 135   |
| H(18C) | 7710  | 2427  | 6909 | 135   |
| H(19A) | 7022  | -343  | 6525 | 62    |
| H(19B) | 6965  | 270   | 7203 | 62    |
| H(20A) | 9795  | 293   | 6563 | 107   |
| H(20B) | 9664  | -79   | 7164 | 107   |
| H(20C) | 9739  | 908   | 7241 | 107   |
| H(21A) | 7438  | -1531 | 4883 | 54    |
| H(21B) | 9343  | -1093 | 5011 | 54    |
| H(22A) | 9572  | -1762 | 3935 | 58    |
| H(22B) | 7693  | -2222 | 3829 | 58    |
| H(23A) | 8506  | -2901 | 4651 | 55    |
| H(23B) | 10387 | -2490 | 4690 | 55    |
| H(24A) | 8513  | -3711 | 3596 | 59    |
| H(24B) | 10396 | -3299 | 3635 | 59    |
| H(25A) | 9435  | -4313 | 4453 | 61    |
| H(25B) | 11307 | -3964 | 4415 | 61    |
| H(26A) | 9178  | -5196 | 3393 | 59    |

|        |       |       |       |     |
|--------|-------|-------|-------|-----|
| H(26B) | 11087 | -4870 | 3387  | 59  |
| H(27A) | 11903 | -5475 | 4231  | 78  |
| H(27B) | 9999  | -5793 | 4244  | 78  |
| H(28A) | 11677 | -6404 | 3205  | 84  |
| H(28B) | 9788  | -6736 | 3237  | 84  |
| H(29A) | 12604 | -6932 | 4087  | 139 |
| H(29B) | 10724 | -7249 | 4134  | 139 |
| H(30A) | 10479 | -8232 | 3185  | 211 |
| H(30B) | 11985 | -8342 | 3682  | 211 |
| H(30C) | 12354 | -7910 | 3128  | 211 |
| H(32)  | 6266  | 4347  | 4173  | 67  |
| H(33)  | 5970  | 5612  | 4876  | 66  |
| H(34)  | 4873  | 6666  | 4507  | 63  |
| H(35)  | 4113  | 6512  | 3418  | 60  |
| H(40)  | 3458  | 5024  | 1319  | 54  |
| H(42)  | 3832  | 3115  | 153   | 65  |
| H(43)  | 3273  | 2897  | -932  | 76  |
| H(45)  | 1870  | 5222  | -688  | 56  |
| H(49A) | 1902  | 4461  | -2321 | 65  |
| H(49B) | 2089  | 5123  | -1645 | 65  |
| H(50A) | -673  | 4887  | -2159 | 105 |
| H(50B) | -602  | 4565  | -1529 | 105 |
| H(50C) | -789  | 3905  | -2207 | 105 |
| H(51A) | 838   | 6187  | 64    | 59  |
| H(51B) | 2748  | 6487  | 29    | 59  |
| H(52A) | 1172  | 6979  | 1132  | 62  |
| H(52B) | 3130  | 7215  | 1151  | 62  |
| H(53A) | 644   | 7758  | 368   | 66  |
| H(53B) | 2597  | 8002  | 397   | 66  |
| H(54A) | 783   | 8599  | 1404  | 62  |
| H(54B) | 2769  | 8783  | 1492  | 62  |

|        |      |       |       |     |
|--------|------|-------|-------|-----|
| H(55A) | 2635 | 9553  | 727   | 69  |
| H(55B) | 659  | 9317  | 574   | 69  |
| H(56A) | 2467 | 10424 | 1729  | 66  |
| H(56B) | 490  | 10162 | 1605  | 66  |
| H(57A) | 2301 | 11120 | 914   | 73  |
| H(57B) | 350  | 10797 | 721   | 73  |
| H(58A) | 1952 | 12069 | 1822  | 71  |
| H(58B) | 63   | 11654 | 1767  | 71  |
| H(59A) | 1226 | 12574 | 914   | 86  |
| H(59B) | -656 | 12139 | 839   | 86  |
| H(60A) | -438 | 13584 | 1307  | 134 |
| H(60B) | 936  | 13523 | 1873  | 134 |
| H(60C) | -941 | 13082 | 1808  | 134 |
| H(47A) | 1386 | 2612  | -1765 | 58  |
| H(47B) | 891  | 2957  | -2380 | 58  |
| H(48A) | 3263 | 2242  | -2521 | 87  |
| H(48B) | 4260 | 2850  | -1868 | 87  |
| H(48C) | 3796 | 3218  | -2465 | 87  |
| H(47C) | 3605 | 3546  | -2351 | 60  |
| H(47D) | 4176 | 3178  | -1758 | 60  |
| H(48D) | 1007 | 2677  | -2578 | 93  |
| H(48E) | 1409 | 2372  | -1946 | 93  |
| H(48F) | 2391 | 2083  | -2526 | 93  |

---

**Table 29.** Crystal data and structure refinement for **CV16-R**.

|                                   |                                                       |
|-----------------------------------|-------------------------------------------------------|
| Identification code               | <b>CV16-R</b>                                         |
| Empirical formula                 | C <sub>36</sub> H <sub>51</sub> N <sub>3</sub> O S    |
| Formula weight                    | 573.85                                                |
| Temperature                       | 223(2) K                                              |
| Wavelength                        | 0.71073 Å                                             |
| Crystal system                    | Triclinic                                             |
| Space group                       | P-1                                                   |
| Unit cell dimensions              | a = 11.183(2) Å<br>b = 11.367(2) Å<br>c = 14.014(3) Å |
| Volume                            | 1683.8(6) Å <sup>3</sup>                              |
| Z                                 | 2                                                     |
| Density (calculated)              | 1.132 Mg/m <sup>3</sup>                               |
| Absorption coefficient            | 0.127 mm <sup>-1</sup>                                |
| F(000)                            | 624                                                   |
| Crystal size                      | 0.200 x 0.105 x 0.072 mm <sup>3</sup>                 |
| Theta range for data collection   | 1.851 to 28.324°.                                     |
| Index ranges                      | -14<=h<=14, -15<=k<=15, -18<=l<=18                    |
| Reflections collected             | 63050                                                 |
| Independent reflections           | 8319 [R(int) = 0.0790]                                |
| Completeness to theta = 26.03°    | 99.9 %                                                |
| Absorption correction             | Semi-empirical from equivalents                       |
| Refinement method                 | Full-matrix least-squares on F <sup>2</sup>           |
| Data / restraints / parameters    | 8319 / 24 / 374                                       |
| Goodness-of-fit on F <sup>2</sup> | 1.041                                                 |
| Final R indices [I>2sigma(I)]     | R1 = 0.0866, wR2 = 0.2330                             |
| R indices (all data)              | R1 = 0.1672, wR2 = 0.2917                             |
| Largest diff. peak and hole       | 0.859 and -0.540 e.Å <sup>-3</sup>                    |

**Table 30.** Atomic coordinates ( $\times 10^4$ ) and equivalent isotropic displacement parameters ( $\text{\AA}^2 \times 10^3$ ) for **CV16-R**.  $U(\text{eq})$  is defined as one third of the trace of the orthogonalized  $U^{ij}$  tensor.

|       | x        | y        | z       | $U(\text{eq})$ |
|-------|----------|----------|---------|----------------|
| S(1A) | -1377(1) | 1502(1)  | 8754(1) | 68(1)          |
| N(1A) | -3454(2) | 162(2)   | 9472(2) | 98(1)          |
| S(1B) | -3454(2) | 162(2)   | 9472(2) | 98(1)          |
| N(1B) | -1377(1) | 1502(1)  | 8754(1) | 68(1)          |
| O(1)  | 1490(2)  | -465(2)  | 7985(2) | 60(1)          |
| N(2)  | -3015(4) | -2786(4) | 9535(4) | 124(2)         |
| N(3)  | 2188(3)  | -4482(3) | 8246(2) | 67(1)          |
| C(1)  | -2462(3) | 2170(3)  | 9025(3) | 61(1)          |
| C(2)  | -2502(5) | 3446(4)  | 8943(3) | 100(2)         |
| C(3)  | -3589(5) | 3775(4)  | 9269(4) | 93(1)          |
| C(4)  | -4408(5) | 2954(6)  | 9585(4) | 107(2)         |
| C(5)  | -4343(5) | 1905(6)  | 9645(4) | 98(2)          |
| C(6)  | -3392(3) | 1483(3)  | 9378(2) | 61(1)          |
| C(7)  | -2159(3) | 190(3)   | 9089(2) | 55(1)          |
| C(8)  | -1675(3) | -914(3)  | 9024(2) | 55(1)          |
| C(9)  | -2419(4) | -1950(4) | 9310(3) | 78(1)          |
| C(10) | -608(3)  | -933(3)  | 8696(2) | 53(1)          |
| C(11) | 35(3)    | -1876(3) | 8568(2) | 53(1)          |
| C(12) | 1152(3)  | -1616(3) | 8211(2) | 52(1)          |
| C(13) | 1839(3)  | -2474(3) | 8093(3) | 56(1)          |
| C(14) | 1474(3)  | -3654(3) | 8330(2) | 56(1)          |
| C(15) | 359(3)   | -3926(3) | 8670(3) | 62(1)          |
| C(16) | -313(3)  | -3076(3) | 8784(3) | 62(1)          |
| C(17) | 1804(4)  | -5719(3) | 8468(3) | 77(1)          |
| C(18) | 845(4)   | -6556(4) | 7625(3) | 86(1)          |

|       |          |          |         |       |
|-------|----------|----------|---------|-------|
| C(19) | 3360(4)  | -4185(4) | 7892(3) | 78(1) |
| C(20) | 3117(5)  | -4306(4) | 6806(3) | 88(1) |
| C(21) | 2620(3)  | -146(3)  | 7643(3) | 56(1) |
| C(22) | 2793(3)  | 1139(3)  | 7416(3) | 57(1) |
| C(23) | 3956(3)  | 1462(3)  | 6995(3) | 56(1) |
| C(24) | 4284(3)  | 2775(3)  | 6785(3) | 58(1) |
| C(25) | 5515(3)  | 3056(3)  | 6442(3) | 60(1) |
| C(26) | 5997(3)  | 4392(3)  | 6352(3) | 62(1) |
| C(27) | 7274(3)  | 4651(3)  | 6101(3) | 64(1) |
| C(28) | 7761(3)  | 5955(3)  | 5950(3) | 63(1) |
| C(29) | 9035(3)  | 6201(3)  | 5689(3) | 62(1) |
| C(30) | 9452(3)  | 7451(3)  | 5418(3) | 61(1) |
| C(31) | 10686(3) | 7657(3)  | 5093(3) | 59(1) |
| C(32) | 11055(3) | 8868(3)  | 4727(3) | 60(1) |
| C(33) | 12261(3) | 9035(3)  | 4360(3) | 60(1) |
| C(34) | 12663(3) | 10258(3) | 4017(3) | 61(1) |
| C(35) | 13857(4) | 10378(3) | 3642(3) | 71(1) |
| C(36) | 14330(4) | 11611(4) | 3354(3) | 88(1) |

---

**Table 31.** Bond lengths [ $\text{\AA}$ ] and angles [ $^\circ$ ] for **CV16-R**.

---

|             |          |
|-------------|----------|
| S(1A)-C(1)  | 1.650(4) |
| S(1A)-C(7)  | 1.723(4) |
| N(1A)-C(6)  | 1.508(4) |
| N(1A)-C(7)  | 1.644(4) |
| S(1B)-C(6)  | 1.508(4) |
| S(1B)-C(7)  | 1.644(4) |
| N(1B)-C(1)  | 1.650(4) |
| N(1B)-C(7)  | 1.723(4) |
| O(1)-C(12)  | 1.370(4) |
| O(1)-C(21)  | 1.434(4) |
| N(2)-C(9)   | 1.152(5) |
| N(3)-C(14)  | 1.369(4) |
| N(3)-C(17)  | 1.463(4) |
| N(3)-C(19)  | 1.483(5) |
| C(1)-C(6)   | 1.373(5) |
| C(1)-C(2)   | 1.474(6) |
| C(2)-C(3)   | 1.492(7) |
| C(2)-H(2)   | 0.9400   |
| C(3)-C(4)   | 1.340(7) |
| C(3)-H(3)   | 0.9400   |
| C(4)-C(5)   | 1.219(7) |
| C(4)-H(4)   | 0.9400   |
| C(5)-C(6)   | 1.362(6) |
| C(5)-H(5)   | 0.9400   |
| C(7)-C(8)   | 1.471(5) |
| C(8)-C(10)  | 1.370(4) |
| C(8)-C(9)   | 1.434(5) |
| C(10)-C(11) | 1.429(5) |
| C(10)-H(10) | 0.9400   |
| C(11)-C(16) | 1.416(4) |
| C(11)-C(12) | 1.428(4) |
| C(12)-C(13) | 1.380(4) |
| C(13)-C(14) | 1.409(4) |
| C(13)-H(13) | 0.9400   |

|              |          |
|--------------|----------|
| C(14)-C(15)  | 1.413(5) |
| C(15)-C(16)  | 1.361(5) |
| C(15)-H(15)  | 0.9400   |
| C(16)-H(16)  | 0.9400   |
| C(17)-C(18)  | 1.509(6) |
| C(17)-H(17A) | 0.9800   |
| C(17)-H(17B) | 0.9800   |
| C(18)-H(18A) | 0.9700   |
| C(18)-H(18B) | 0.9700   |
| C(18)-H(18C) | 0.9700   |
| C(19)-C(20)  | 1.476(6) |
| C(19)-H(19A) | 0.9800   |
| C(19)-H(19B) | 0.9800   |
| C(20)-H(20A) | 0.9700   |
| C(20)-H(20B) | 0.9700   |
| C(20)-H(20C) | 0.9700   |
| C(21)-C(22)  | 1.505(4) |
| C(21)-H(21A) | 0.9800   |
| C(21)-H(21B) | 0.9800   |
| C(22)-C(23)  | 1.531(4) |
| C(22)-H(22A) | 0.9800   |
| C(22)-H(22B) | 0.9800   |
| C(23)-C(24)  | 1.530(4) |
| C(23)-H(23A) | 0.9800   |
| C(23)-H(23B) | 0.9800   |
| C(24)-C(25)  | 1.536(5) |
| C(24)-H(24A) | 0.9800   |
| C(24)-H(24B) | 0.9800   |
| C(25)-C(26)  | 1.528(5) |
| C(25)-H(25A) | 0.9800   |
| C(25)-H(25B) | 0.9800   |
| C(26)-C(27)  | 1.519(5) |
| C(26)-H(26A) | 0.9800   |
| C(26)-H(26B) | 0.9800   |
| C(27)-C(28)  | 1.518(5) |
| C(27)-H(27A) | 0.9800   |



|                  |           |
|------------------|-----------|
| C(27)-H(27B)     | 0.9800    |
| C(28)-C(29)      | 1.522(5)  |
| C(28)-H(28A)     | 0.9800    |
| C(28)-H(28B)     | 0.9800    |
| C(29)-C(30)      | 1.509(5)  |
| C(29)-H(29A)     | 0.9800    |
| C(29)-H(29B)     | 0.9800    |
| C(30)-C(31)      | 1.523(4)  |
| C(30)-H(30A)     | 0.9800    |
| C(30)-H(30B)     | 0.9800    |
| C(31)-C(32)      | 1.519(5)  |
| C(31)-H(31A)     | 0.9800    |
| C(31)-H(31B)     | 0.9800    |
| C(32)-C(33)      | 1.526(5)  |
| C(32)-H(32A)     | 0.9800    |
| C(32)-H(32B)     | 0.9800    |
| C(33)-C(34)      | 1.523(5)  |
| C(33)-H(33A)     | 0.9800    |
| C(33)-H(33B)     | 0.9800    |
| C(34)-C(35)      | 1.522(5)  |
| C(34)-H(34A)     | 0.9800    |
| C(34)-H(34B)     | 0.9800    |
| C(35)-C(36)      | 1.513(5)  |
| C(35)-H(35A)     | 0.9800    |
| C(35)-H(35B)     | 0.9800    |
| C(36)-H(36A)     | 0.9700    |
| C(36)-H(36B)     | 0.9700    |
| C(36)-H(36C)     | 0.9700    |
| C(1)-S(1A)-C(7)  | 88.36(18) |
| C(6)-N(1A)-C(7)  | 92.6(2)   |
| C(6)-S(1B)-C(7)  | 92.6(2)   |
| C(1)-N(1B)-C(7)  | 88.36(18) |
| C(12)-O(1)-C(21) | 117.9(2)  |
| C(14)-N(3)-C(17) | 121.3(3)  |
| C(14)-N(3)-C(19) | 121.7(3)  |

|                   |          |
|-------------------|----------|
| C(17)-N(3)-C(19)  | 116.9(3) |
| C(6)-C(1)-C(2)    | 117.3(4) |
| C(6)-C(1)-S(1A)   | 117.0(3) |
| C(2)-C(1)-S(1A)   | 125.7(3) |
| C(6)-C(1)-N(1B)   | 117.0(3) |
| C(2)-C(1)-N(1B)   | 125.7(3) |
| C(1)-C(2)-C(3)    | 112.3(4) |
| C(1)-C(2)-H(2)    | 123.8    |
| C(3)-C(2)-H(2)    | 123.8    |
| C(4)-C(3)-C(2)    | 121.0(4) |
| C(4)-C(3)-H(3)    | 119.5    |
| C(2)-C(3)-H(3)    | 119.5    |
| C(5)-C(4)-C(3)    | 124.8(6) |
| C(5)-C(4)-H(4)    | 117.6    |
| C(3)-C(4)-H(4)    | 117.6    |
| C(4)-C(5)-C(6)    | 120.5(6) |
| C(4)-C(5)-H(5)    | 119.8    |
| C(6)-C(5)-H(5)    | 119.8    |
| C(5)-C(6)-C(1)    | 124.1(4) |
| C(5)-C(6)-N(1A)   | 114.3(4) |
| C(1)-C(6)-N(1A)   | 121.6(3) |
| C(5)-C(6)-S(1B)   | 114.3(4) |
| C(1)-C(6)-S(1B)   | 121.6(3) |
| C(8)-C(7)-S(1B)   | 119.8(3) |
| C(8)-C(7)-N(1A)   | 119.8(3) |
| C(8)-C(7)-S(1A)   | 119.9(2) |
| N(1A)-C(7)-S(1A)  | 120.3(2) |
| C(8)-C(7)-N(1B)   | 119.9(2) |
| S(1B)-C(7)-N(1B)  | 120.3(2) |
| C(10)-C(8)-C(9)   | 123.8(3) |
| C(10)-C(8)-C(7)   | 121.6(3) |
| C(9)-C(8)-C(7)    | 114.6(3) |
| N(2)-C(9)-C(8)    | 179.6(5) |
| C(8)-C(10)-C(11)  | 131.9(3) |
| C(8)-C(10)-H(10)  | 114.1    |
| C(11)-C(10)-H(10) | 114.1    |

|                     |          |
|---------------------|----------|
| C(16)-C(11)-C(12)   | 114.9(3) |
| C(16)-C(11)-C(10)   | 126.1(3) |
| C(12)-C(11)-C(10)   | 119.0(3) |
| O(1)-C(12)-C(13)    | 122.3(3) |
| O(1)-C(12)-C(11)    | 115.5(3) |
| C(13)-C(12)-C(11)   | 122.1(3) |
| C(12)-C(13)-C(14)   | 121.4(3) |
| C(12)-C(13)-H(13)   | 119.3    |
| C(14)-C(13)-H(13)   | 119.3    |
| N(3)-C(14)-C(13)    | 120.9(3) |
| N(3)-C(14)-C(15)    | 122.2(3) |
| C(13)-C(14)-C(15)   | 116.9(3) |
| C(16)-C(15)-C(14)   | 121.3(3) |
| C(16)-C(15)-H(15)   | 119.3    |
| C(14)-C(15)-H(15)   | 119.3    |
| C(15)-C(16)-C(11)   | 123.3(3) |
| C(15)-C(16)-H(16)   | 118.3    |
| C(11)-C(16)-H(16)   | 118.3    |
| N(3)-C(17)-C(18)    | 113.2(3) |
| N(3)-C(17)-H(17A)   | 108.9    |
| C(18)-C(17)-H(17A)  | 108.9    |
| N(3)-C(17)-H(17B)   | 108.9    |
| C(18)-C(17)-H(17B)  | 108.9    |
| H(17A)-C(17)-H(17B) | 107.8    |
| C(17)-C(18)-H(18A)  | 109.5    |
| C(17)-C(18)-H(18B)  | 109.5    |
| H(18A)-C(18)-H(18B) | 109.5    |
| C(17)-C(18)-H(18C)  | 109.5    |
| H(18A)-C(18)-H(18C) | 109.5    |
| H(18B)-C(18)-H(18C) | 109.5    |
| C(20)-C(19)-N(3)    | 112.8(4) |
| C(20)-C(19)-H(19A)  | 109      |
| N(3)-C(19)-H(19A)   | 109      |
| C(20)-C(19)-H(19B)  | 109      |
| N(3)-C(19)-H(19B)   | 109      |
| H(19A)-C(19)-H(19B) | 107.8    |

|                     |          |
|---------------------|----------|
| C(19)-C(20)-H(20A)  | 109.5    |
| C(19)-C(20)-H(20B)  | 109.5    |
| H(20A)-C(20)-H(20B) | 109.5    |
| C(19)-C(20)-H(20C)  | 109.5    |
| H(20A)-C(20)-H(20C) | 109.5    |
| H(20B)-C(20)-H(20C) | 109.5    |
| O(1)-C(21)-C(22)    | 109.1(3) |
| O(1)-C(21)-H(21A)   | 109.9    |
| C(22)-C(21)-H(21A)  | 109.9    |
| O(1)-C(21)-H(21B)   | 109.9    |
| C(22)-C(21)-H(21B)  | 109.9    |
| H(21A)-C(21)-H(21B) | 108.3    |
| C(21)-C(22)-C(23)   | 109.4(3) |
| C(21)-C(22)-H(22A)  | 109.8    |
| C(23)-C(22)-H(22A)  | 109.8    |
| C(21)-C(22)-H(22B)  | 109.8    |
| C(23)-C(22)-H(22B)  | 109.8    |
| H(22A)-C(22)-H(22B) | 108.2    |
| C(24)-C(23)-C(22)   | 114.7(3) |
| C(24)-C(23)-H(23A)  | 108.6    |
| C(22)-C(23)-H(23A)  | 108.6    |
| C(24)-C(23)-H(23B)  | 108.6    |
| C(22)-C(23)-H(23B)  | 108.6    |
| H(23A)-C(23)-H(23B) | 107.6    |
| C(23)-C(24)-C(25)   | 111.6(3) |
| C(23)-C(24)-H(24A)  | 109.3    |
| C(25)-C(24)-H(24A)  | 109.3    |
| C(23)-C(24)-H(24B)  | 109.3    |
| C(25)-C(24)-H(24B)  | 109.3    |
| H(24A)-C(24)-H(24B) | 108      |
| C(26)-C(25)-C(24)   | 114.5(3) |
| C(26)-C(25)-H(25A)  | 108.6    |
| C(24)-C(25)-H(25A)  | 108.6    |
| C(26)-C(25)-H(25B)  | 108.6    |
| C(24)-C(25)-H(25B)  | 108.6    |
| H(25A)-C(25)-H(25B) | 107.6    |

|                     |          |
|---------------------|----------|
| C(27)-C(26)-C(25)   | 112.9(3) |
| C(27)-C(26)-H(26A)  | 109      |
| C(25)-C(26)-H(26A)  | 109      |
| C(27)-C(26)-H(26B)  | 109      |
| C(25)-C(26)-H(26B)  | 109      |
| H(26A)-C(26)-H(26B) | 107.8    |
| C(28)-C(27)-C(26)   | 114.8(3) |
| C(28)-C(27)-H(27A)  | 108.6    |
| C(26)-C(27)-H(27A)  | 108.6    |
| C(28)-C(27)-H(27B)  | 108.6    |
| C(26)-C(27)-H(27B)  | 108.6    |
| H(27A)-C(27)-H(27B) | 107.5    |
| C(27)-C(28)-C(29)   | 114.4(3) |
| C(27)-C(28)-H(28A)  | 108.7    |
| C(29)-C(28)-H(28A)  | 108.7    |
| C(27)-C(28)-H(28B)  | 108.7    |
| C(29)-C(28)-H(28B)  | 108.7    |
| H(28A)-C(28)-H(28B) | 107.6    |
| C(30)-C(29)-C(28)   | 114.7(3) |
| C(30)-C(29)-H(29A)  | 108.6    |
| C(28)-C(29)-H(29A)  | 108.6    |
| C(30)-C(29)-H(29B)  | 108.6    |
| C(28)-C(29)-H(29B)  | 108.6    |
| H(29A)-C(29)-H(29B) | 107.6    |
| C(29)-C(30)-C(31)   | 114.1(3) |
| C(29)-C(30)-H(30A)  | 108.7    |
| C(31)-C(30)-H(30A)  | 108.7    |
| C(29)-C(30)-H(30B)  | 108.7    |
| C(31)-C(30)-H(30B)  | 108.7    |
| H(30A)-C(30)-H(30B) | 107.6    |
| C(32)-C(31)-C(30)   | 114.7(3) |
| C(32)-C(31)-H(31A)  | 108.6    |
| C(30)-C(31)-H(31A)  | 108.6    |
| C(32)-C(31)-H(31B)  | 108.6    |
| C(30)-C(31)-H(31B)  | 108.6    |
| H(31A)-C(31)-H(31B) | 107.6    |

|                     |          |
|---------------------|----------|
| C(31)-C(32)-C(33)   | 114.0(3) |
| C(31)-C(32)-H(32A)  | 108.8    |
| C(33)-C(32)-H(32A)  | 108.8    |
| C(31)-C(32)-H(32B)  | 108.8    |
| C(33)-C(32)-H(32B)  | 108.8    |
| H(32A)-C(32)-H(32B) | 107.7    |
| C(34)-C(33)-C(32)   | 114.6(3) |
| C(34)-C(33)-H(33A)  | 108.6    |
| C(32)-C(33)-H(33A)  | 108.6    |
| C(34)-C(33)-H(33B)  | 108.6    |
| C(32)-C(33)-H(33B)  | 108.6    |
| H(33A)-C(33)-H(33B) | 107.6    |
| C(35)-C(34)-C(33)   | 112.9(3) |
| C(35)-C(34)-H(34A)  | 109      |
| C(33)-C(34)-H(34A)  | 109      |
| C(35)-C(34)-H(34B)  | 109      |
| C(33)-C(34)-H(34B)  | 109      |
| H(34A)-C(34)-H(34B) | 107.8    |
| C(36)-C(35)-C(34)   | 114.3(3) |
| C(36)-C(35)-H(35A)  | 108.7    |
| C(34)-C(35)-H(35A)  | 108.7    |
| C(36)-C(35)-H(35B)  | 108.7    |
| C(34)-C(35)-H(35B)  | 108.7    |
| H(35A)-C(35)-H(35B) | 107.6    |
| C(35)-C(36)-H(36A)  | 109.5    |
| C(35)-C(36)-H(36B)  | 109.5    |
| H(36A)-C(36)-H(36B) | 109.5    |
| C(35)-C(36)-H(36C)  | 109.5    |
| H(36A)-C(36)-H(36C) | 109.5    |
| H(36B)-C(36)-H(36C) | 109.5    |

---

Symmetry transformations used to generate equivalent atoms:

**Table 32.** Anisotropic displacement parameters ( $\text{\AA}^2 \times 10^3$ ) for **CV16-R**. The anisotropic displacement factor exponent takes the form:  $-2\pi^2[h^2a^{*2}U^{11} + \dots + 2hka^*b^*U^{12}]$ .

|       | U <sup>11</sup> | U <sup>22</sup> | U <sup>33</sup> | U <sup>23</sup> | U <sup>13</sup> | U <sup>12</sup> |
|-------|-----------------|-----------------|-----------------|-----------------|-----------------|-----------------|
| S(1A) | 71(1)           | 66(1)           | 75(1)           | 10(1)           | 25(1)           | 25(1)           |
| N(1A) | 152(2)          | 61(1)           | 79(1)           | 9(1)            | 8(1)            | 43(1)           |
| S(1B) | 152(2)          | 61(1)           | 79(1)           | 9(1)            | 8(1)            | 43(1)           |
| N(1B) | 71(1)           | 66(1)           | 75(1)           | 10(1)           | 25(1)           | 25(1)           |
| O(1)  | 55(1)           | 45(1)           | 86(2)           | 18(1)           | 29(1)           | 13(1)           |
| N(2)  | 121(3)          | 82(3)           | 219(5)          | 74(3)           | 103(4)          | 48(2)           |
| N(3)  | 73(2)           | 50(2)           | 87(2)           | 16(2)           | 26(2)           | 23(1)           |
| C(1)  | 60(2)           | 63(2)           | 58(2)           | 11(2)           | 13(2)           | 8(2)            |
| C(2)  | 101(3)          | 94(3)           | 74(3)           | 21(2)           | -1(2)           | -28(2)          |
| C(3)  | 122(3)          | 61(2)           | 86(3)           | -6(2)           | -14(2)          | 47(2)           |
| C(4)  | 97(3)           | 127(4)          | 93(3)           | 3(3)            | 15(2)           | 31(3)           |
| C(5)  | 87(3)           | 121(3)          | 85(3)           | -5(3)           | 26(2)           | 26(3)           |
| C(6)  | 61(2)           | 67(2)           | 53(2)           | 4(2)            | 20(2)           | 4(2)            |
| C(7)  | 56(2)           | 57(2)           | 52(2)           | 6(2)            | 14(2)           | 14(2)           |
| C(8)  | 58(2)           | 51(2)           | 62(2)           | 15(2)           | 21(2)           | 12(2)           |
| C(9)  | 77(3)           | 66(2)           | 117(3)          | 36(2)           | 51(3)           | 33(2)           |
| C(10) | 56(2)           | 48(2)           | 56(2)           | 11(1)           | 17(2)           | 11(1)           |
| C(11) | 53(2)           | 50(2)           | 55(2)           | 8(1)            | 15(2)           | 9(1)            |
| C(12) | 55(2)           | 45(2)           | 56(2)           | 9(1)            | 12(2)           | 10(1)           |
| C(13) | 55(2)           | 48(2)           | 66(2)           | 10(2)           | 17(2)           | 14(2)           |
| C(14) | 60(2)           | 49(2)           | 60(2)           | 9(2)            | 15(2)           | 14(2)           |
| C(15) | 68(2)           | 45(2)           | 78(2)           | 16(2)           | 26(2)           | 12(2)           |
| C(16) | 63(2)           | 54(2)           | 73(2)           | 14(2)           | 27(2)           | 10(2)           |
| C(17) | 85(3)           | 56(2)           | 99(3)           | 20(2)           | 26(2)           | 28(2)           |
| C(18) | 94(3)           | 64(2)           | 102(3)          | 5(2)            | 30(3)           | 15(2)           |
| C(19) | 88(3)           | 61(2)           | 99(3)           | 19(2)           | 32(2)           | 34(2)           |
| C(20) | 101(3)          | 73(3)           | 101(4)          | 18(2)           | 31(3)           | 31(2)           |
| C(21) | 53(2)           | 47(2)           | 70(2)           | 12(2)           | 23(2)           | 11(1)           |
| C(22) | 55(2)           | 46(2)           | 71(2)           | 11(2)           | 18(2)           | 11(1)           |
| C(23) | 57(2)           | 51(2)           | 63(2)           | 12(2)           | 19(2)           | 15(2)           |
| C(24) | 58(2)           | 53(2)           | 67(2)           | 14(2)           | 20(2)           | 14(2)           |
| C(25) | 60(2)           | 58(2)           | 66(2)           | 15(2)           | 22(2)           | 12(2)           |
| C(26) | 60(2)           | 60(2)           | 74(2)           | 21(2)           | 24(2)           | 15(2)           |
| C(27) | 60(2)           | 64(2)           | 76(2)           | 19(2)           | 25(2)           | 14(2)           |
| C(28) | 57(2)           | 61(2)           | 74(2)           | 18(2)           | 25(2)           | 11(2)           |
| C(29) | 52(2)           | 63(2)           | 74(2)           | 15(2)           | 17(2)           | 11(2)           |
| C(30) | 54(2)           | 62(2)           | 70(2)           | 16(2)           | 21(2)           | 12(2)           |
| C(31) | 49(2)           | 56(2)           | 71(2)           | 10(2)           | 14(2)           | 12(2)           |
| C(32) | 55(2)           | 58(2)           | 71(2)           | 12(2)           | 20(2)           | 16(2)           |
| C(33) | 52(2)           | 55(2)           | 75(2)           | 11(2)           | 19(2)           | 13(2)           |

|       |       |       |       |       |       |       |
|-------|-------|-------|-------|-------|-------|-------|
| C(34) | 57(2) | 58(2) | 69(2) | 12(2) | 17(2) | 16(2) |
| C(35) | 64(2) | 71(2) | 83(3) | 19(2) | 26(2) | 13(2) |
| C(36) | 89(3) | 83(3) | 93(3) | 24(2) | 34(3) | 4(2)  |

---



**Table 33.** Hydrogen coordinates ( $\times 10^4$ ) and isotropic displacement parameters ( $\text{\AA}^2 \times 10^3$ ) for **CV16-R**.

|        | x     | y     | z    | U(eq) |
|--------|-------|-------|------|-------|
| H(2)   | -1909 | 3990  | 8711 | 120   |
| H(3)   | -3702 | 4570  | 9253 | 112   |
| H(4)   | -5082 | 3205  | 9775 | 128   |
| H(5)   | -4953 | 1384  | 9878 | 117   |
| H(10)  | -230  | -189  | 8523 | 63    |
| H(13)  | 2566  | -2266 | 7851 | 67    |
| H(15)  | 76    | -4710 | 8821 | 75    |
| H(16)  | -1045 | -3297 | 9017 | 74    |
| H(17A) | 1449  | -5688 | 9049 | 93    |
| H(17B) | 2550  | -6054 | 8633 | 93    |
| H(18A) | 627   | -7359 | 7813 | 129   |
| H(18B) | 1196  | -6607 | 7051 | 129   |
| H(18C) | 95    | -6241 | 7468 | 129   |
| H(19A) | 3817  | -3349 | 8172 | 94    |
| H(19B) | 3899  | -4726 | 8131 | 94    |
| H(20A) | 3904  | -4036 | 6617 | 133   |
| H(20B) | 2542  | -3811 | 6561 | 133   |
| H(20C) | 2746  | -5150 | 6527 | 133   |
| H(21A) | 2560  | -702  | 7048 | 67    |
| H(21B) | 3345  | -215  | 8151 | 67    |
| H(22A) | 2900  | 1699  | 8019 | 68    |
| H(22B) | 2046  | 1219  | 6936 | 68    |
| H(23A) | 4680  | 1316  | 7461 | 67    |
| H(23B) | 3819  | 914   | 6379 | 67    |
| H(24A) | 4369  | 3331  | 7386 | 70    |
| H(24B) | 3597  | 2910  | 6274 | 70    |

|        |       |       |      |     |
|--------|-------|-------|------|-----|
| H(25A) | 6167  | 2802  | 6908 | 72  |
| H(25B) | 5385  | 2569  | 5798 | 72  |
| H(26A) | 5386  | 4630  | 5838 | 75  |
| H(26B) | 6059  | 4891  | 6977 | 75  |
| H(27A) | 7889  | 4449  | 6634 | 77  |
| H(27B) | 7219  | 4113  | 5498 | 77  |
| H(28A) | 7826  | 6493  | 6556 | 75  |
| H(28B) | 7143  | 6161  | 5421 | 75  |
| H(29A) | 9671  | 6092  | 6253 | 75  |
| H(29B) | 8999  | 5594  | 5134 | 75  |
| H(30A) | 9545  | 8058  | 5989 | 73  |
| H(30B) | 8790  | 7582  | 4883 | 73  |
| H(31A) | 11361 | 7602  | 5650 | 71  |
| H(31B) | 10619 | 7003  | 4564 | 71  |
| H(32A) | 11164 | 9525  | 5266 | 72  |
| H(32B) | 10364 | 8942  | 4190 | 72  |
| H(33A) | 12944 | 8937  | 4893 | 72  |
| H(33B) | 12142 | 8389  | 3811 | 72  |
| H(34A) | 11979 | 10366 | 3488 | 73  |
| H(34B) | 12802 | 10907 | 4567 | 73  |
| H(35A) | 14521 | 10212 | 4157 | 85  |
| H(35B) | 13697 | 9757  | 3067 | 85  |
| H(36A) | 15075 | 11609 | 3106 | 132 |
| H(36B) | 14539 | 12229 | 3928 | 132 |
| H(36C) | 13680 | 11786 | 2846 | 132 |

---

## 10. $^1\text{H}$ -NMR and $^{13}\text{C}$ -NMR Spectral Data

$^1\text{H}$ -NMR Spectrum of **1** in  $\text{CDCl}_3$  (400 MHz):

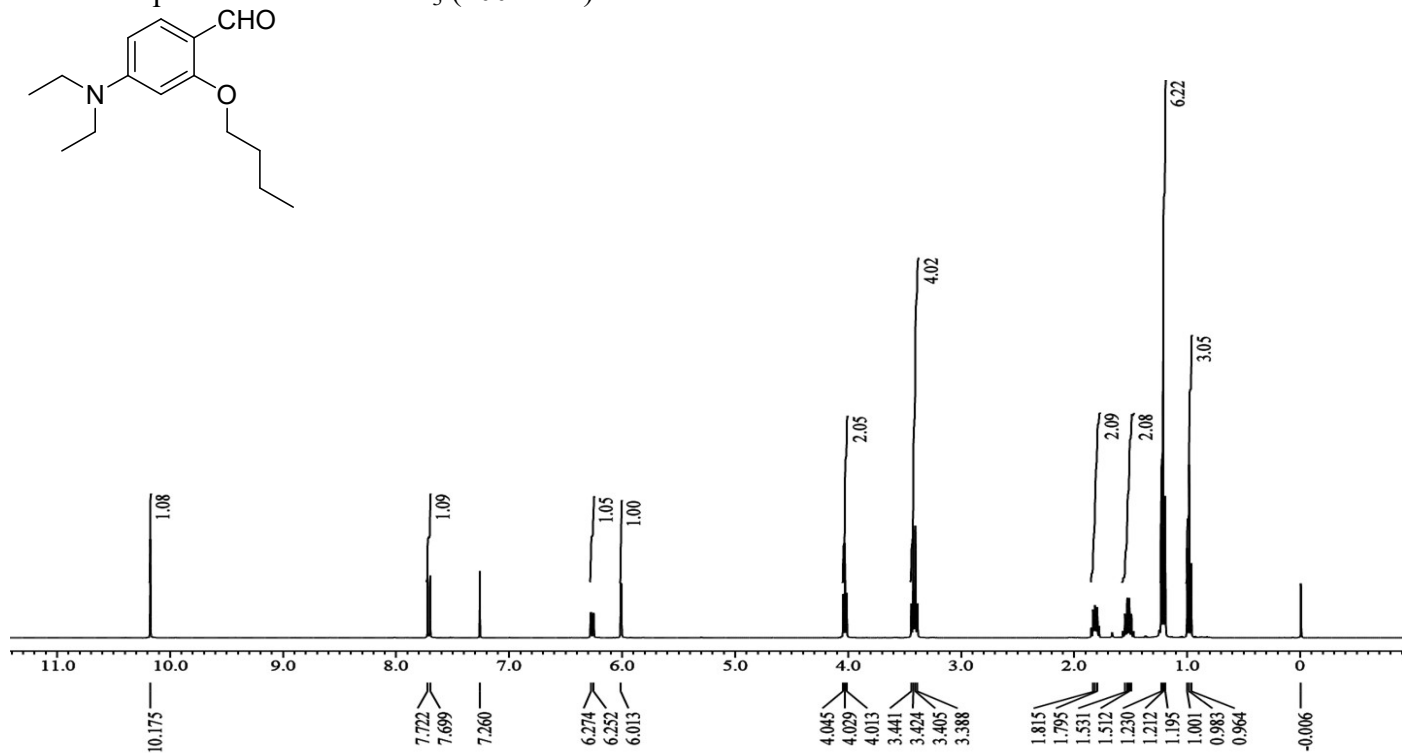

$^{13}\text{C}$ -NMR Spectrum of **1** in  $\text{CDCl}_3$  (100 MHz):

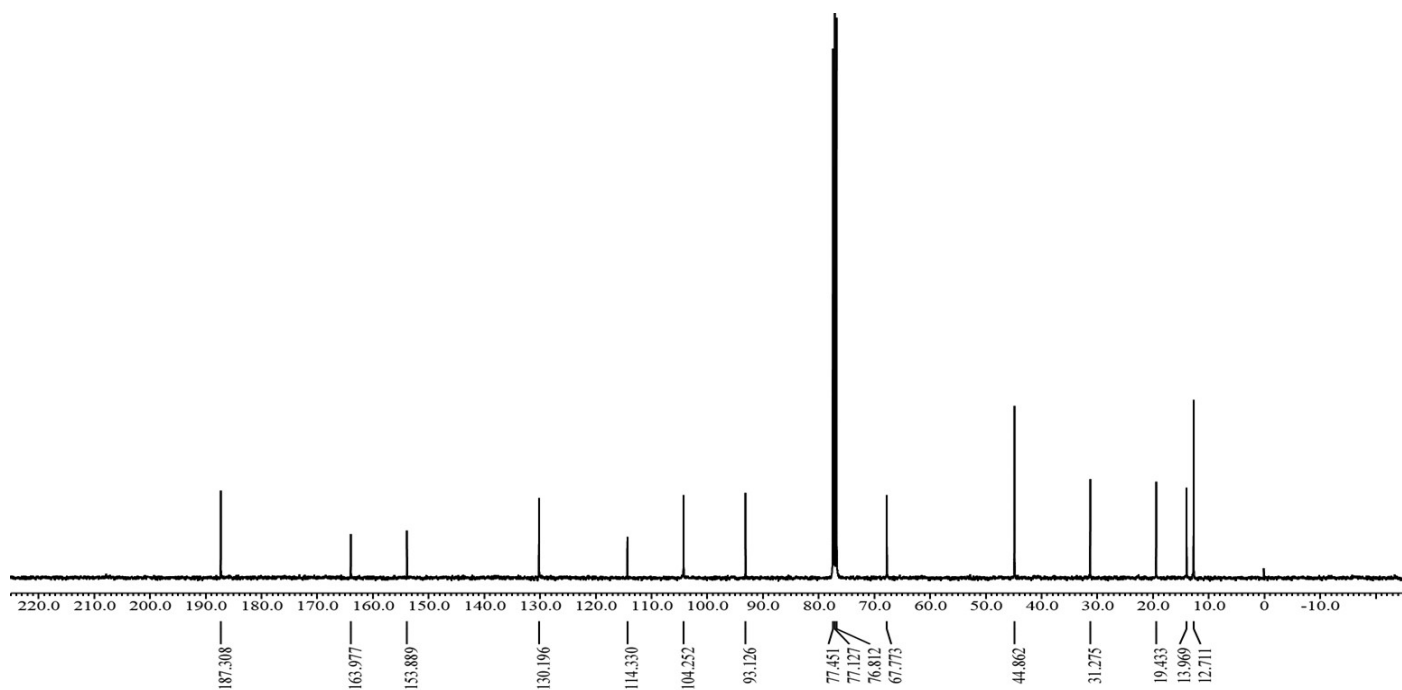

$^1\text{H-NMR}$  Spectrum of **2** in  $\text{CDCl}_3$  (400 MHz):

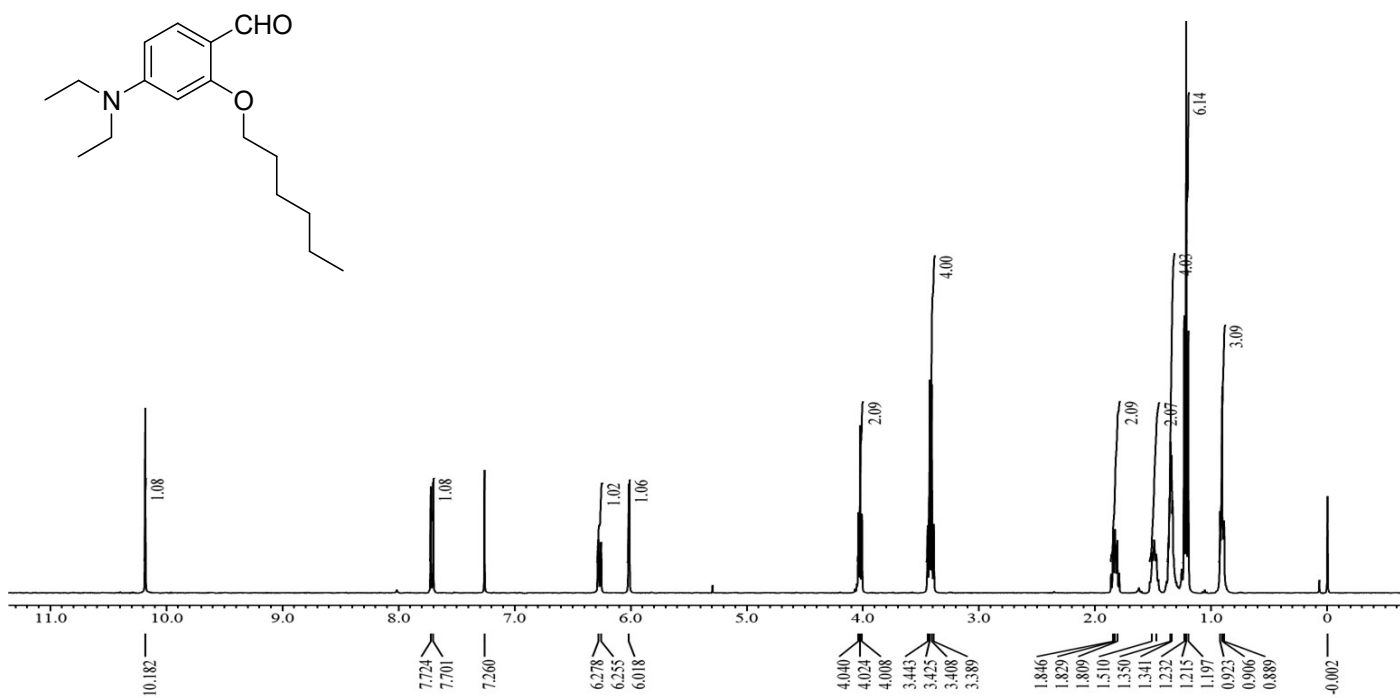

$^{13}\text{C-NMR}$  Spectrum of **2** in  $\text{CDCl}_3$  (100 MHz):

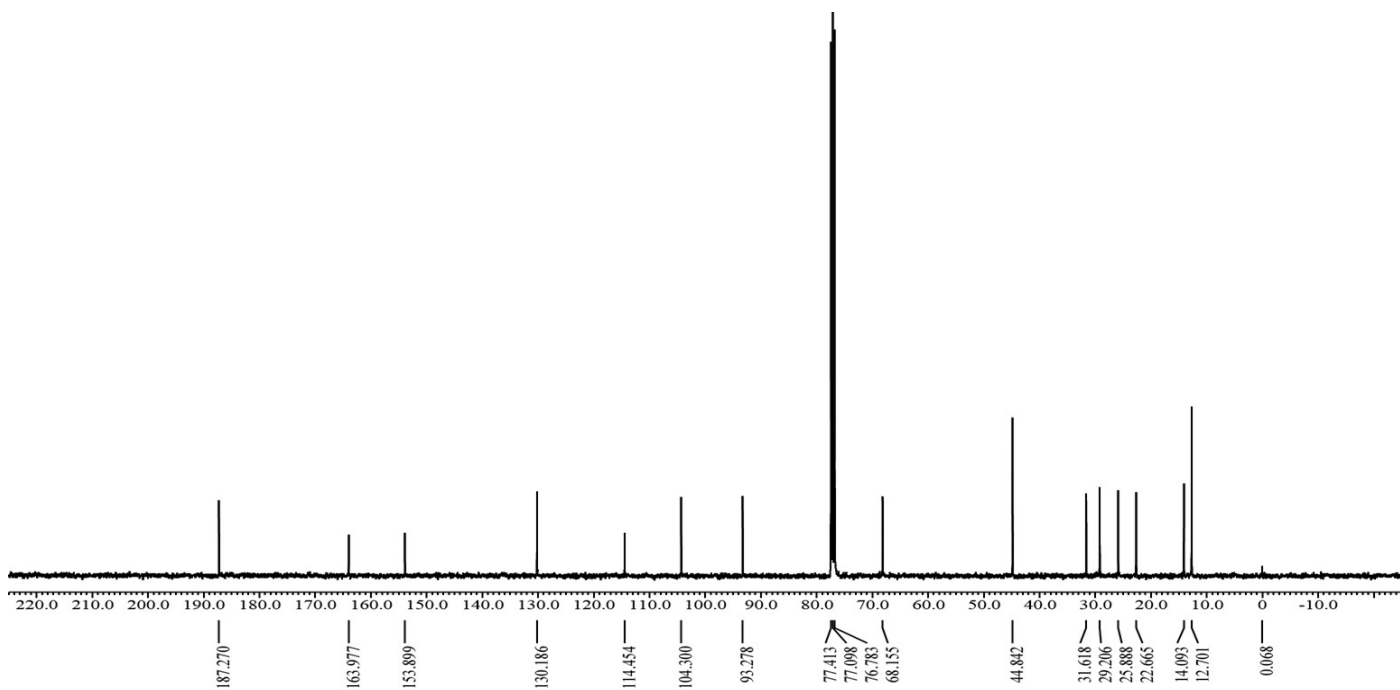

<sup>1</sup>H-NMR Spectrum of **3** in CDCl<sub>3</sub> (400 MHz):

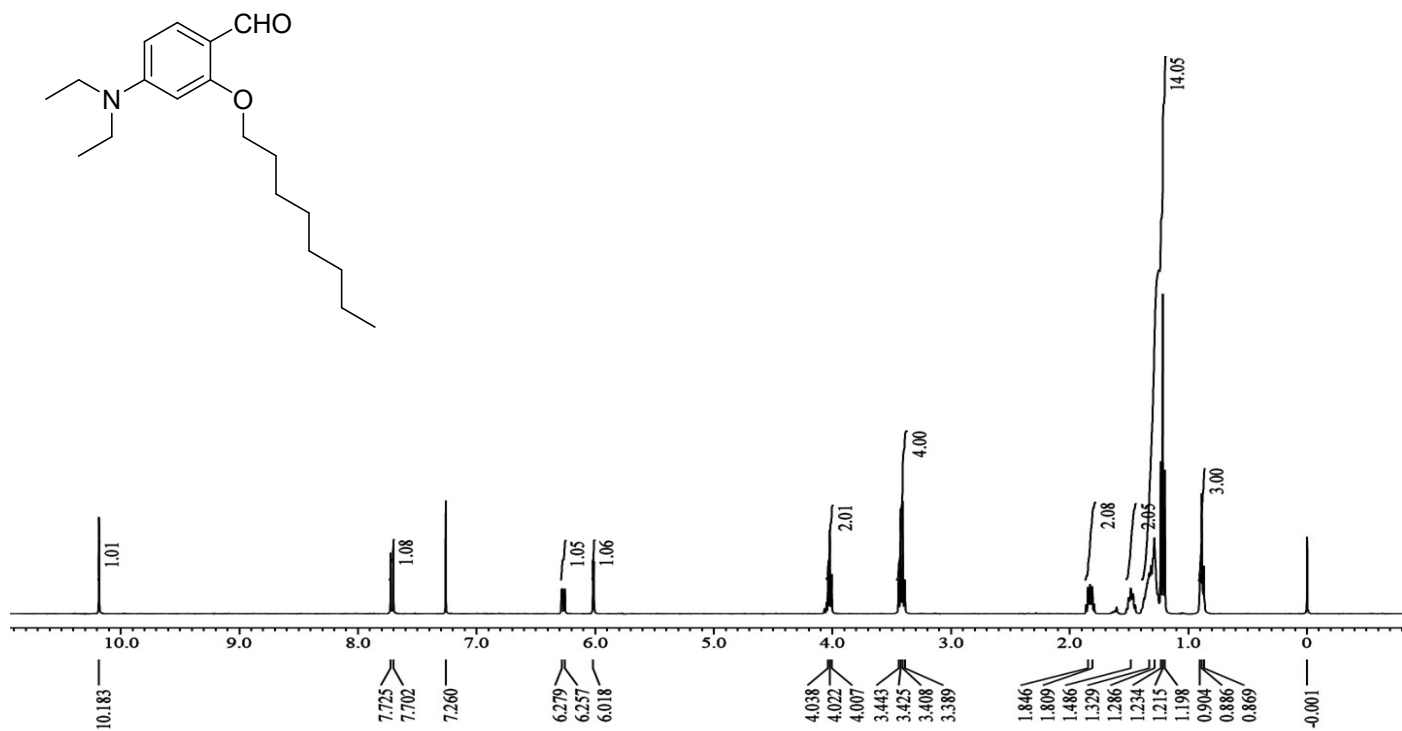

<sup>13</sup>C-NMR Spectrum of **3** in CDCl<sub>3</sub> (100 MHz):

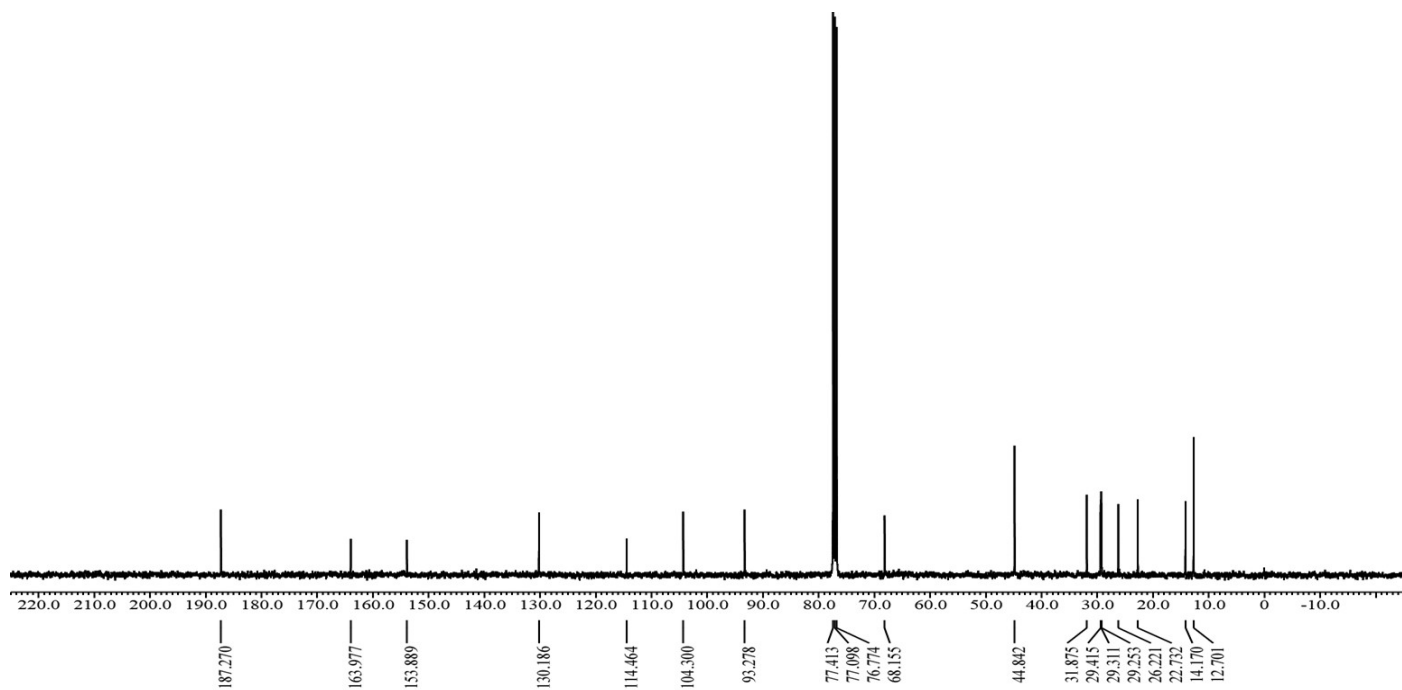

<sup>1</sup>H-NMR Spectrum of **4** in CDCl<sub>3</sub> (400 MHz):

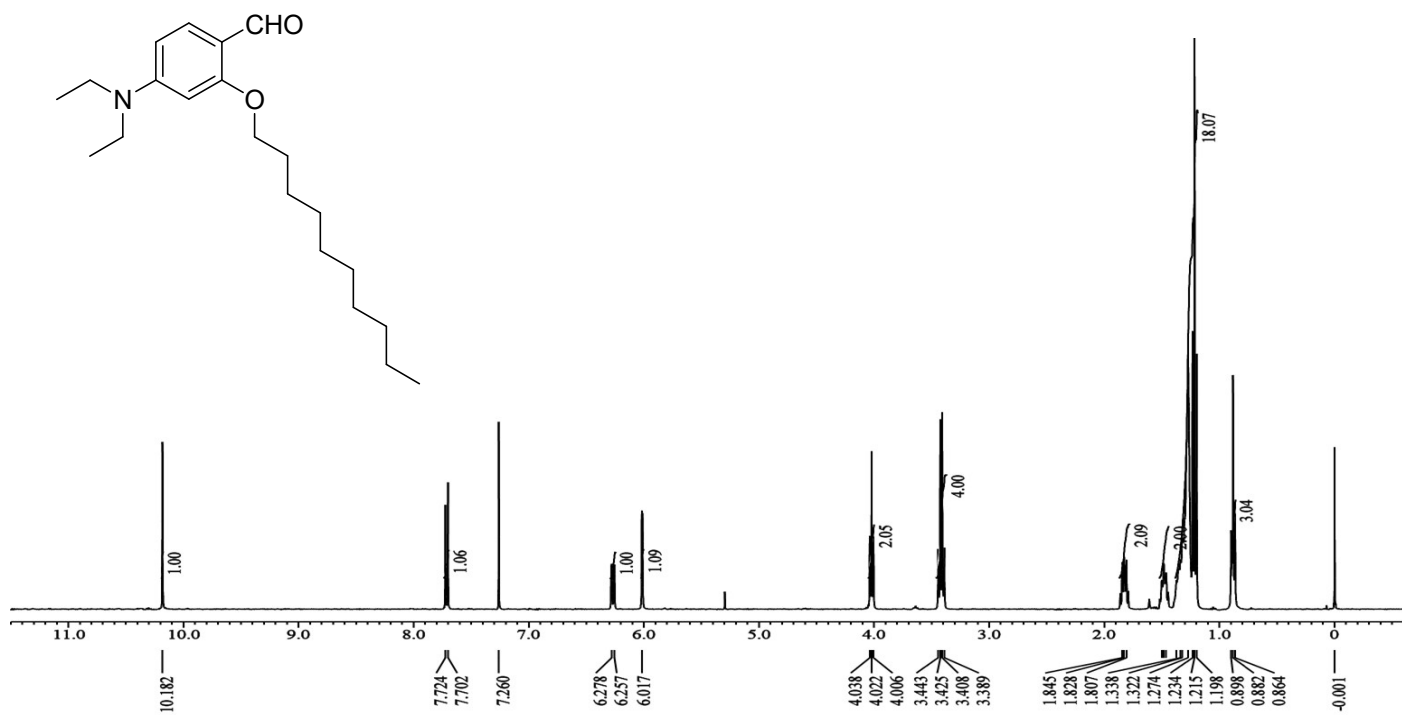

<sup>13</sup>C-NMR Spectrum of **4** in CDCl<sub>3</sub> (100 MHz):

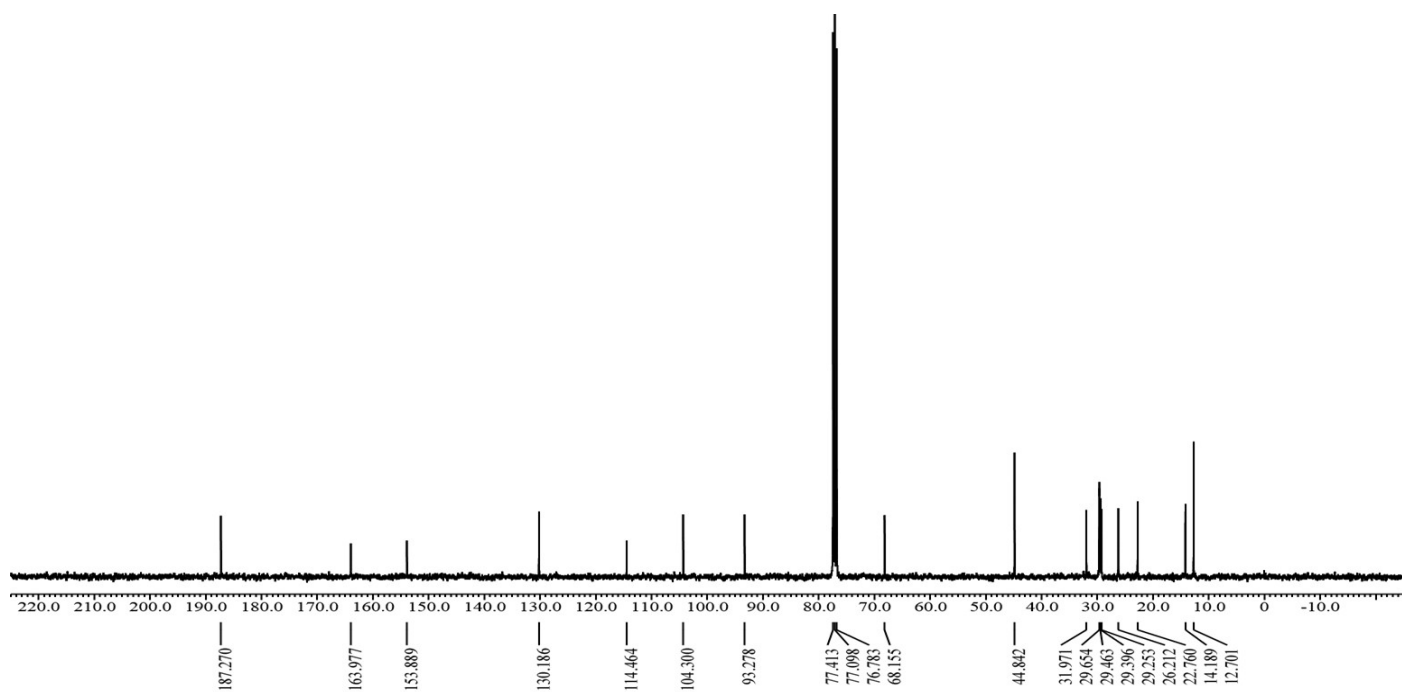

$^1\text{H-NMR}$  Spectrum of **5** in  $\text{CDCl}_3$  (400 MHz):

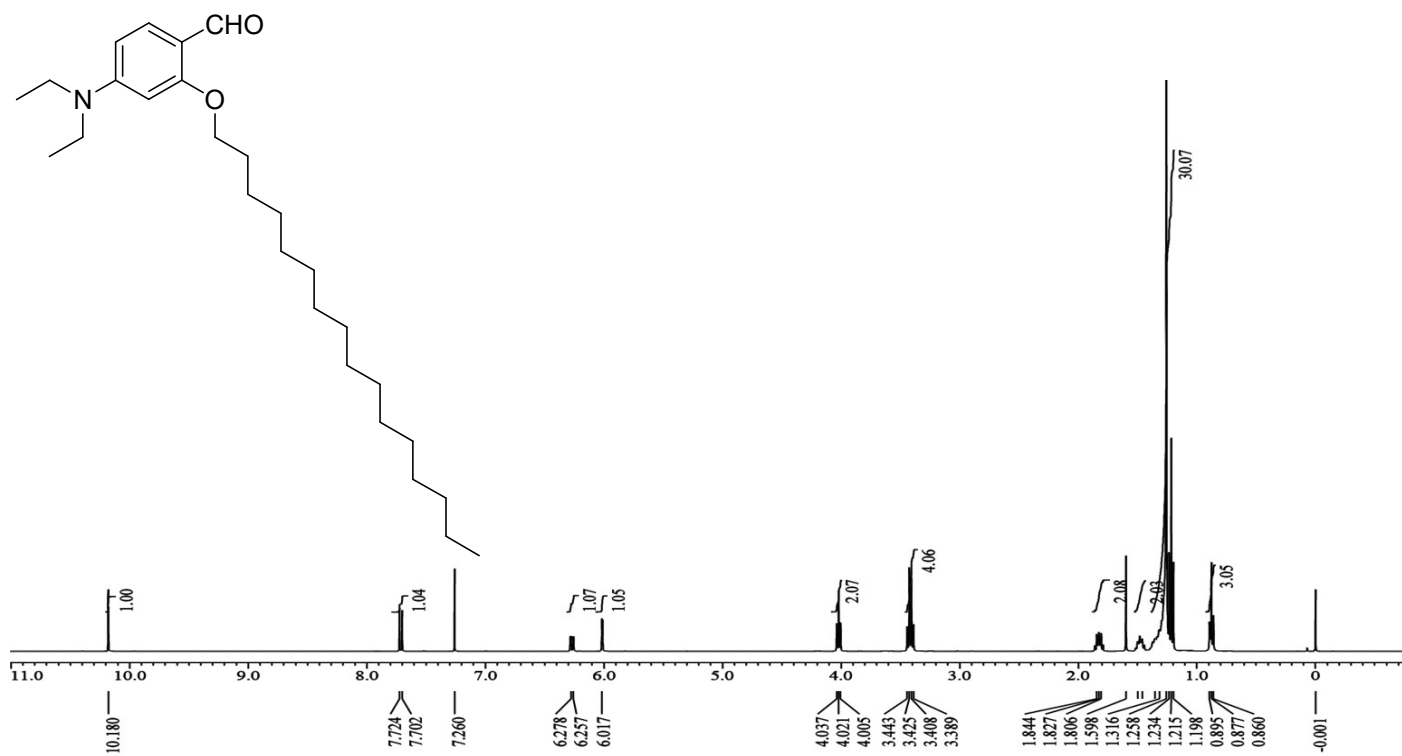

$^{13}\text{C-NMR}$  Spectrum of **5** in  $\text{CDCl}_3$  (100 MHz):

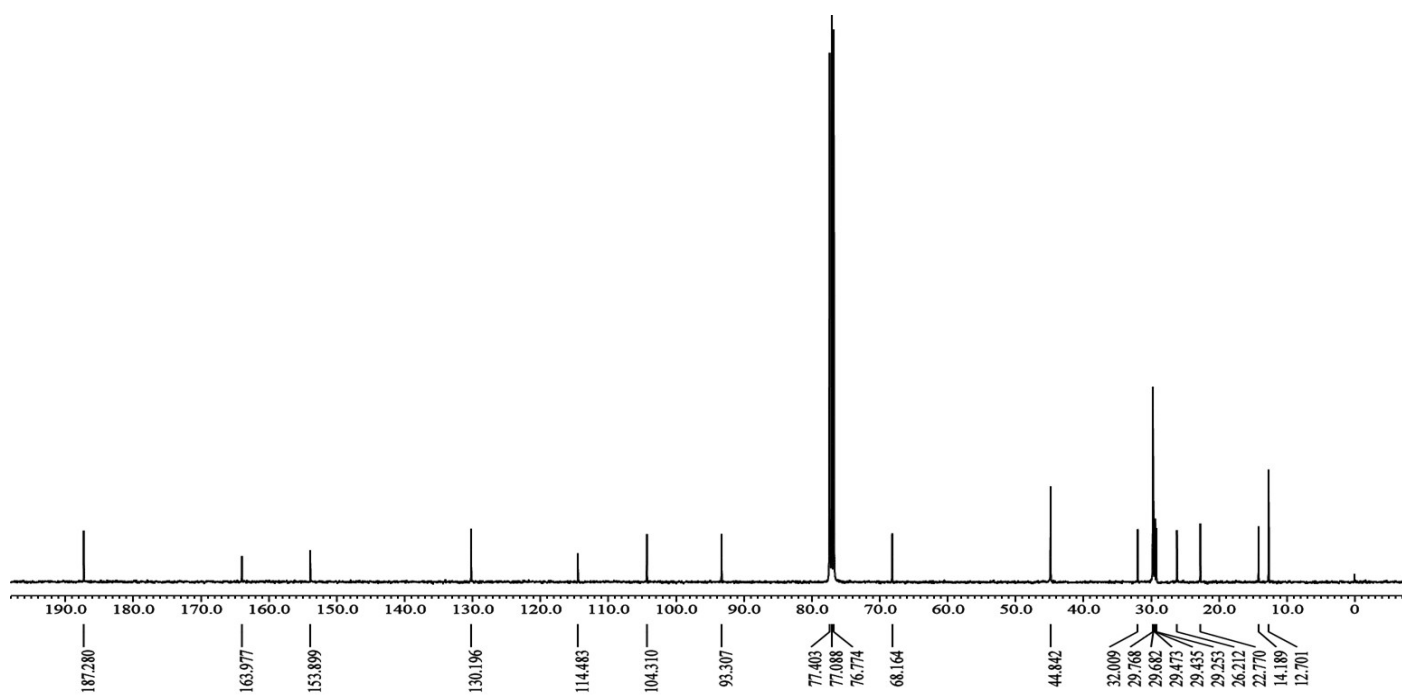

$^1\text{H-NMR}$  Spectrum of **CV4-R** in  $\text{CDCl}_3$  (400 MHz):

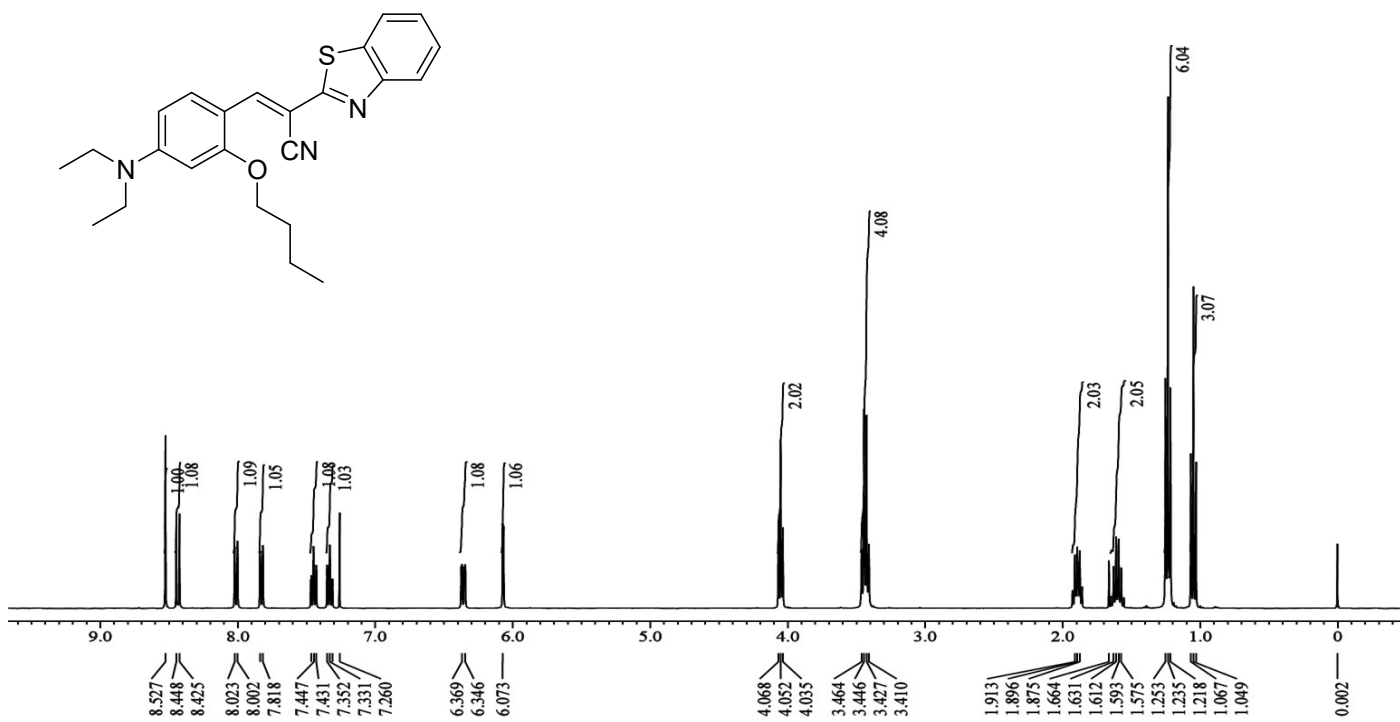

$^{13}\text{C-NMR}$  Spectrum of **CV4-R** in  $\text{CDCl}_3$  (100 MHz):

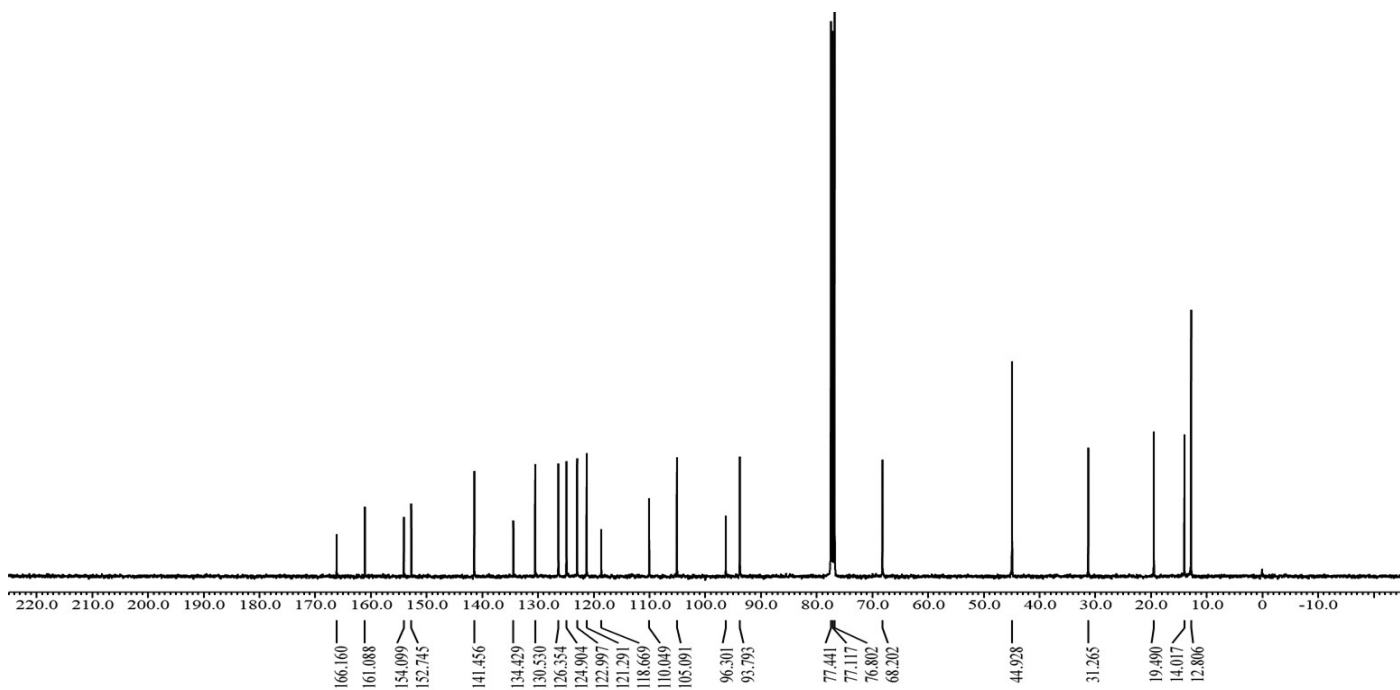



<sup>1</sup>H-NMR Spectrum of CV6-O in CDCl<sub>3</sub> (400 MHz):

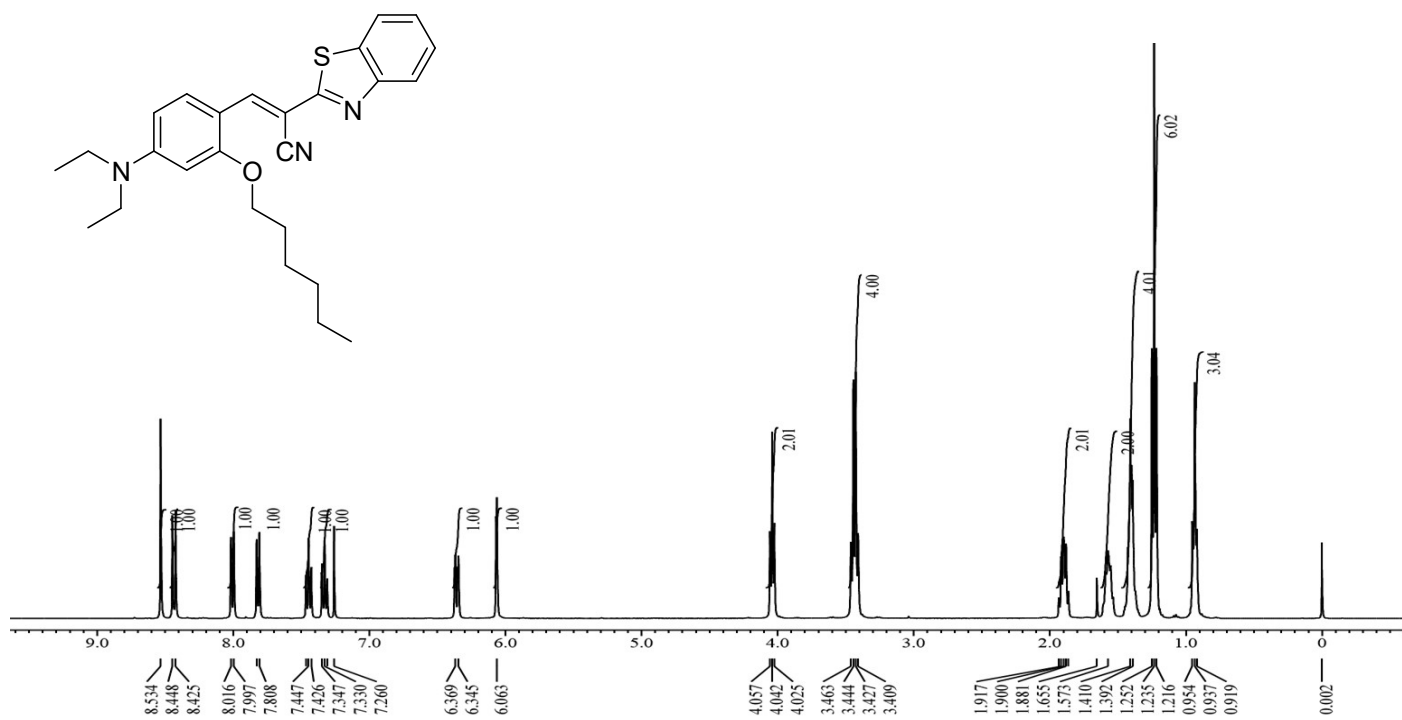

<sup>13</sup>C-NMR Spectrum of CV6-O in CDCl<sub>3</sub> (100 MHz):

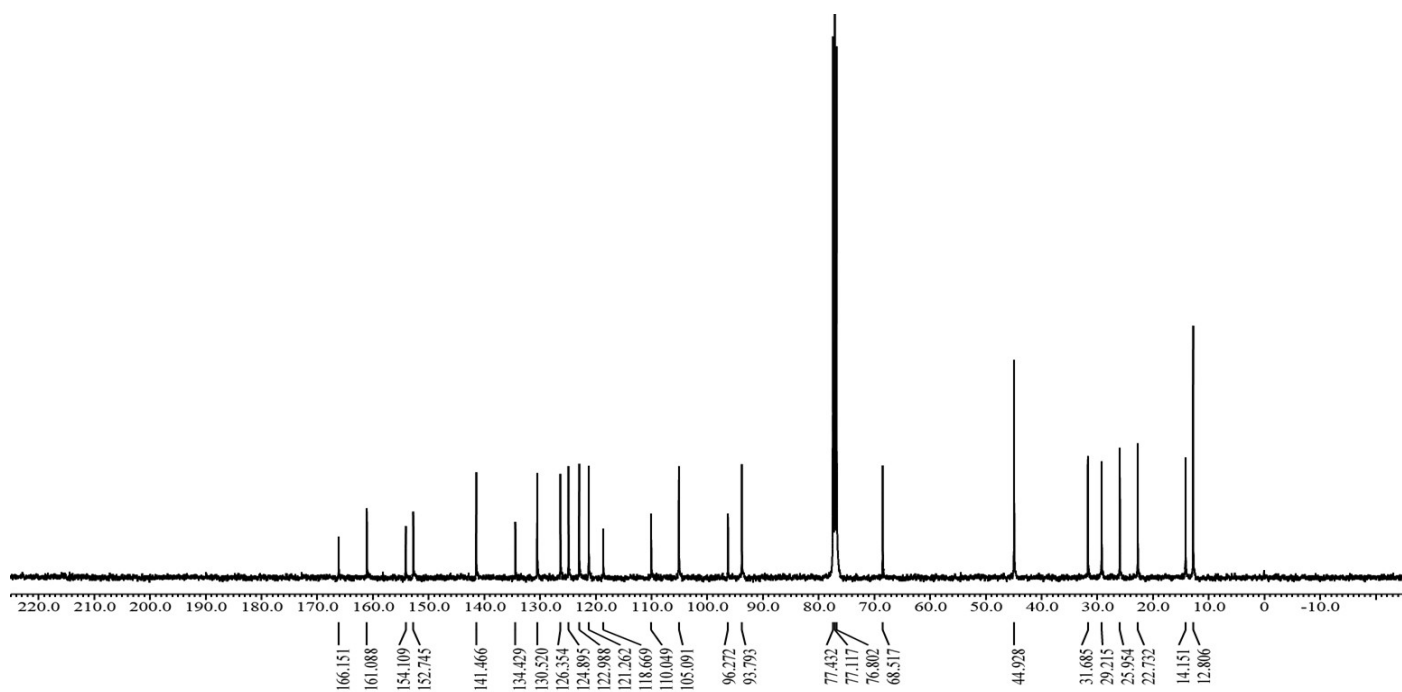

<sup>1</sup>H-NMR Spectrum of CV8-Y in CDCl<sub>3</sub> (400 MHz):

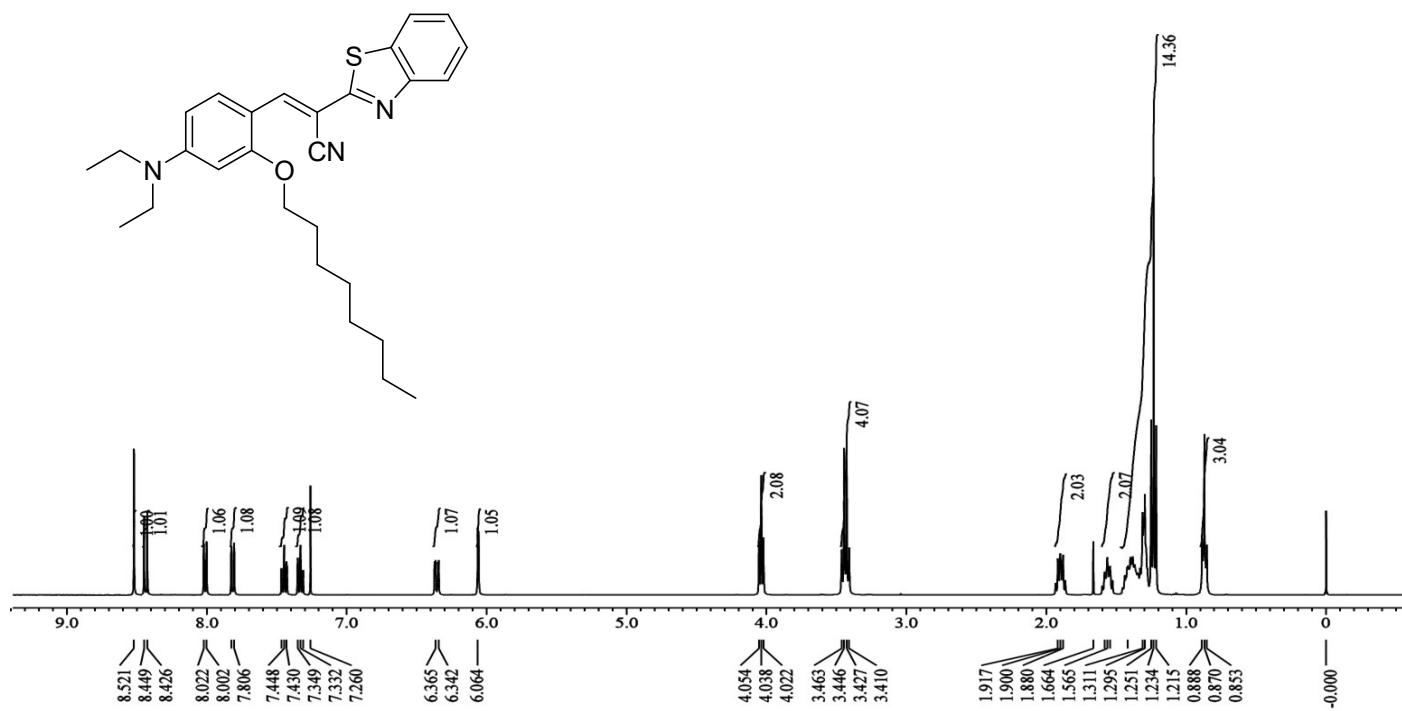

<sup>13</sup>C-NMR Spectrum of CV8-Y in CDCl<sub>3</sub> (100 MHz):

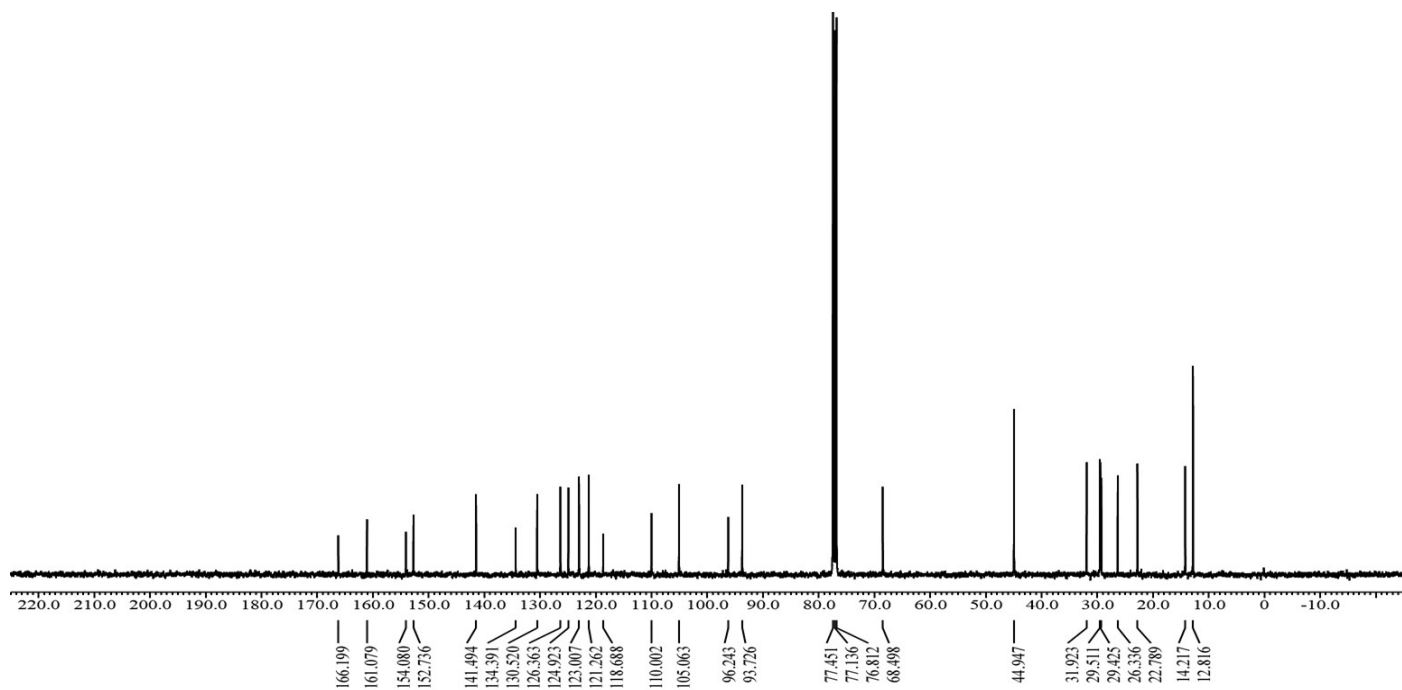

$^1\text{H-NMR}$  Spectrum of **CV10-O** in  $\text{CDCl}_3$  (400 MHz):

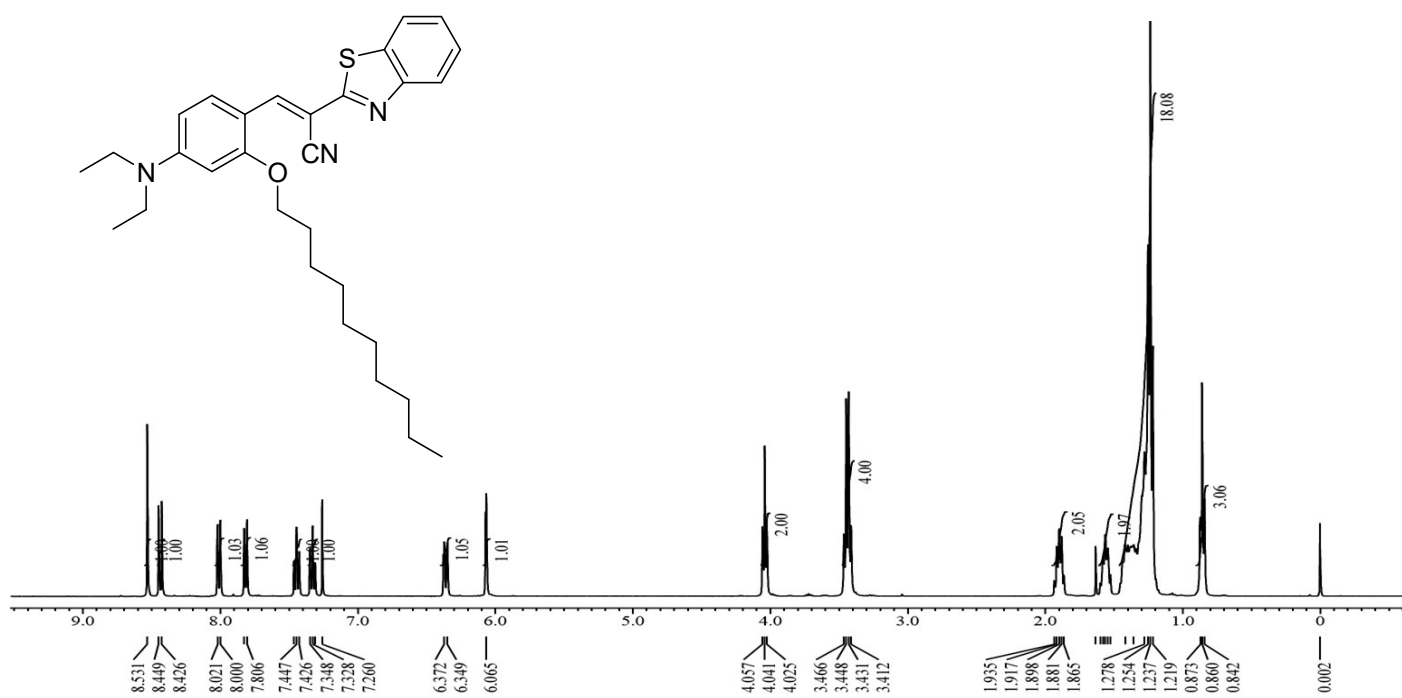

$^{13}\text{C-NMR}$  Spectrum of **CV10-O** in  $\text{CDCl}_3$  (100 MHz):

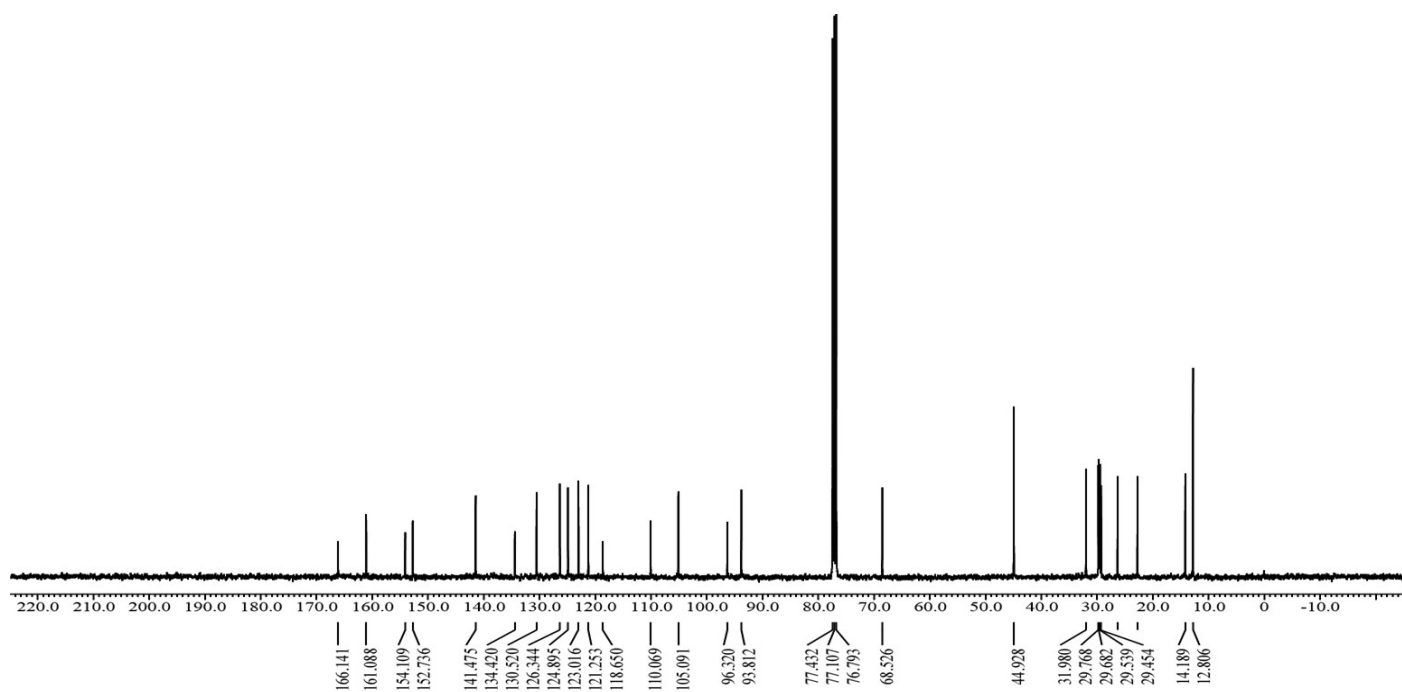

<sup>1</sup>H-NMR Spectrum of CV16-R in CDCl<sub>3</sub> (400 MHz):

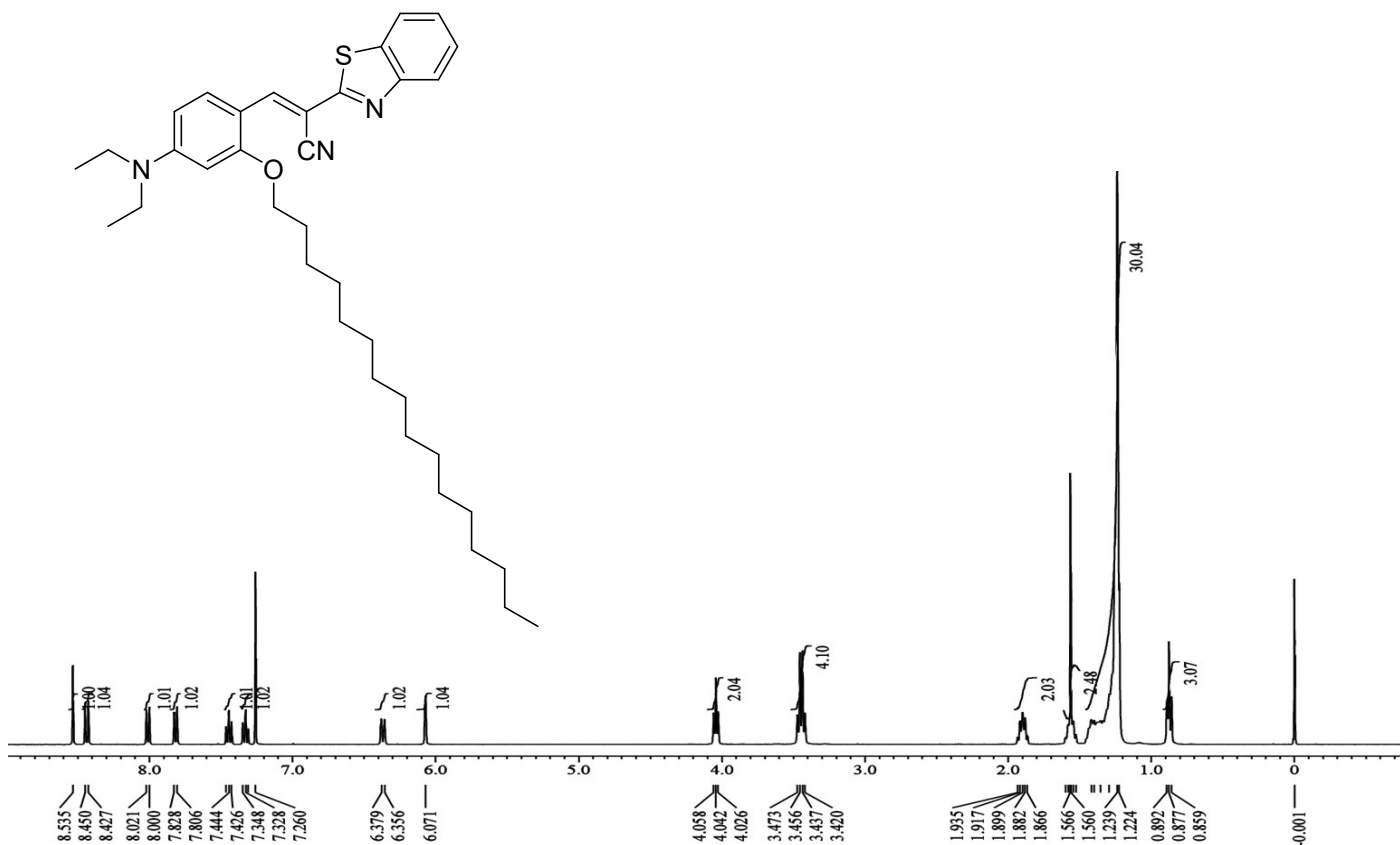

<sup>13</sup>C-NMR Spectrum of CV16-R in CDCl<sub>3</sub> (100 MHz):

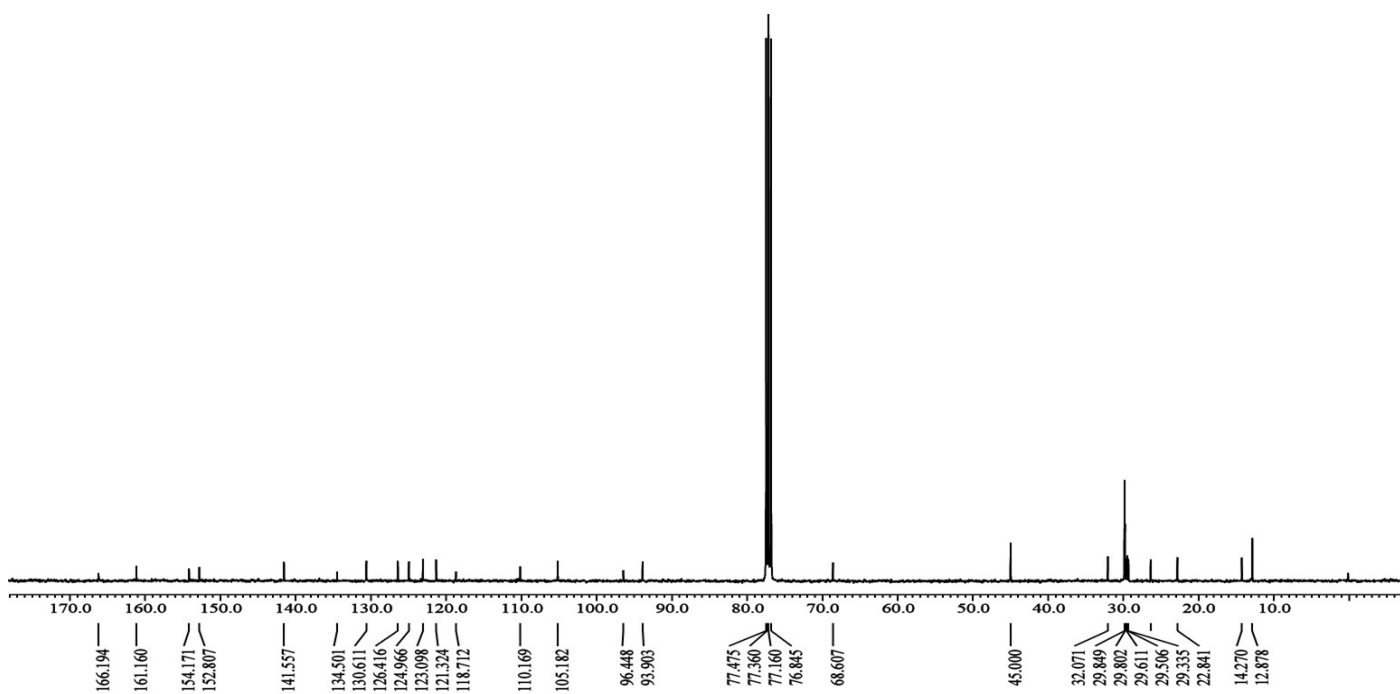

Supplement: d4tc02736a1.pdf [file d4tc02736a1.pdf]
